# Supplementary material for: Validating Uganda's Subnational Health Systems Functionality Index for Universal Health Coverage Outcomes and Revealing Capacity Gaps in Access, Quality, Demand, and Resilience
Source: Research Square preprint supplement (doi:10.21203/rs.3.rs-5743811/v1), 2025-06-04
Supplement: Supplementary file 1 [file 120e7dcea9e1b4f1c48b19d3.xlsx]

## Sheet: 2.FA-UHC Busoga
	UHC-SCI	Func-Access			SUMMARY OUTPUT
BUGIRI	74.1071	74.0385
BUGWERI	33.9286	39.8148			Regression Statistics
BUYENDE	37.5	35.4167			Multiple R	0.816208
IGANGA	80.3571	83.3333			R Square	0.666195
JINJA CITY	34.8214	68.75			Adjusted R Square	0.632814
JINJA D	77.6786	72.2222			Standard Error	12.7972
KALIRO	42.8571	55.7692			Observations	12
KAMULI	67.8571	71.1538
LUUKA	32.1429	29.3478			ANOVA
MAYUGE	79.4643	64.4231				df	SS	MS	F	Significance F
NAMAYINGO	31.25	41.6667			Regression	1	3268.44	3268.44	19.9576	0.00120227
NAMUTUMBA	37.5	50			Residual	10	1637.69	163.769
					Total	11	4906.13
						Coefficients	Standard Error	t Stat	P-value	Lower 95%	Upper 95%	Lower 95.0%	Upper 95.0%
					Intercept	-3.42429	13.0425	-0.262549	0.798228	-32.4847	25.6361	-32.4847	25.6361
					Func-Access	0.977578	0.218825	4.46739	0.00120227	0.490005	1.46515	0.490005	1.46515
					RESIDUAL OUTPUT
					Observation	Predicted UHC-SCI	Residuals
					1	68.954	5.1531
					2	35.4978	-1.56921
					3	31.1982	6.30175
					4	78.0405	2.31664
					5	63.7842	-28.9627
					6	67.1785	10.5
					7	51.0945	-8.23731
					8	66.1341	1.72303
					9	25.2655	6.87737
					10	59.5543	19.91
					11	37.3081	-6.05811
					12	45.4546	-7.95459
