# Supplementary material for: Validating Uganda's Subnational Health Systems Functionality Index for Universal Health Coverage Outcomes and Revealing Capacity Gaps in Access, Quality, Demand, and Resilience
Source: Research Square preprint supplement (doi:10.21203/rs.3.rs-5743811/v1), 2025-06-04
Supplement: Supplementary file 2 [file 1415f1f85cf413517c93b48b.xlsx]

## Sheet: 5.4Func-InherentResUHC
Inherent Resilience	Quality Overall	Demand Overall	Access Overall	Funct ADQinhR	SNUs (Districts)- Region	UHC-SCI		SNUs (Districts)- Region	UHC-SCI	Funct ADQinhR
49	55	67	42	53.25	GOMBA-South Buganda	26		GOMBA-South Buganda	26	53.25
68	73	69	42	63	KALANGALA- South Buganda	26		KALANGALA- South Buganda	26	63
51	64	56	42	53.25	LWENGO- South Buganda	27		LWENGO- South Buganda	27	53.25
33	39	60	44	44	KASESE-Tooro	29		KASESE-Tooro	29	44
59	66	58	42	56.25	MASAKA D- South Buganda	29		MASAKA D- South Buganda	29	56.25
56	58	77	40	57.75	SERERE-Teso	29		SERERE-Teso	29	57.75
80	63	85	45	68.25	KIKUUBE-Bunyoro	29		KIKUUBE-Bunyoro	29	68.25
57	56	73	33	54.75	KAPELEBYONG-Teso	30		KAPELEBYONG-Teso	30	54.75
80	64	73	42	64.75	NAMAYINGO-Busoga	31		NAMAYINGO-Busoga	31	64.75
57	67	60	42	56.5	BUKOMANSIMBI-South Buganda	32		BUKOMANSIMBI-South Buganda	32	56.5
71	55	71	29	56.5	LUUKA-Busoga	32		LUUKA-Busoga	32	56.5
73	63	63	45	61	PAKWACH-West Nil	33		PAKWACH-West Nil	33	61
65	50	77	40	58	BUGWERI-Busoga	34		BUGWERI-Busoga	34	58
80	72	81	38	67.75	NAKAPIRIPIRIT-Karamoja	34		NAKAPIRIPIRIT-Karamoja	34	67.75
44	80	58	69	62.75	JINJA CITY-Busoga	35		JINJA CITY-Busoga	35	62.75
63	83	90	42	69.5	OBONGI-West Nile	35		OBONGI-West Nile	35	69.5		SUMMARY OUTPUT
73	56	67	47	60.75	HOIMA D-Bunyoro	36		HOIMA D-Bunyoro	36	60.75
65	70	67	35	59.25	BUYENDE-Busoga	38		BUYENDE-Busoga	38	59.25		Regression Statistics
79	58	75	39	62.75	KIBAALE-Bunyoro	38		KIBAALE-Bunyoro	38	62.75		Multiple R	0.678132
72	77	73	44	66.5	KWANIA-Lango	38		KWANIA-Lango	38	66.5		R Square	0.459864
72	83	75	50	70	NAMUTUMBA-Busoga	38		NAMUTUMBA-Busoga	38	70		Adjusted R Square	0.452939
71	81	81	47	70	NABILATUK-Karamoja	39		NABILATUK-Karamoja	39	70		Standard Error	16.5685
91	66	69	43	67.25	NTOROKO-Tooro	40		NTOROKO-Tooro	40	67.25		Observations	80
83	80	90	50	75.75	OTUKE-Lango	40		OTUKE-Lango	40	75.75
70	70	94	42	69	RUKIGA-Kigezi	41		RUKIGA-Kigezi	41	69		ANOVA
77	66	79	36	64.5	RUBANDA-Kigezi	42		RUBANDA-Kigezi	42	64.5			df	SS	MS	F	Significance F
72	61	85	46	66	BUKEDEA-Teso	42		BUKEDEA-Teso	42	66		Regression	1	18230	18230	66.408	4.83789e-12
65	53	69	56	60.75	KALIRO-Busoga	43		KALIRO-Busoga	43	60.75		Residual	78	21412.2	274.515
94	91	94	50	82.25	KOLE-Lango	43		KOLE-Lango	43	82.25		Total	79	39642.2
79	89	88	50	76.5	LAMWO-Acholi	44		LAMWO-Acholi	44	76.5
79	67	77	45	67	ALEBTONG-Lango	45		ALEBTONG-Lango	45	67			Coefficients	Standard Error	t Stat	P-value	Lower 95%	Upper 95%	Lower 95.0%	Upper 95.0%
77	77	67	47	67	GULU-Acholi	45		GULU-Acholi	45	67		Intercept	-45.0113	12.9762	-3.46876	0.000854379	-70.8448	-19.1777	-70.8448	-19.1777
88	83	79	49	74.75	AMURU-Acholi	46		AMURU-Acholi	46	74.75		Funct ADQinhR	1.48759	0.182546	8.14911	4.83789e-12	1.12417	1.85101	1.12417	1.85101
62	66	63	71	65.5	KALUNGU- South Buganda	49		KALUNGU- South Buganda	49	65.5
49	41	75	55	55	AMUDAT-Karamoja	54		AMUDAT-Karamoja	54	55
58	70	67	68	65.75	BUTAMBALA-South Buganda	54		BUTAMBALA-South Buganda	54	65.75
67	66	71	65	67.25	MPIGI- South Buganda	56		MPIGI- South Buganda	56	67.25		RESIDUAL OUTPUT
50	66	85	53	63.5	TEREGO-West Nile	57		TEREGO-West Nile	57	63.5
68	69	67	70	68.5	SEMBABULE-S South Buganda	57		SEMBABULE-S South Buganda	57	68.5		Observation	Predicted UHC-SCI	Residuals
73	72	75	78	74.5	MOYO-West Nile	61		MOYO-West Nile	61	74.5		1	34.2029	-8.20291
65	56	73	61	63.75	ARUA CITY-West Nile	62		ARUA CITY-West Nile	62	63.75		2	48.7069	-22.7069
70	67	54	72	65.75	RAKAI- South Buganda	63		RAKAI- South Buganda	63	65.75		3	34.2029	-7.20291
79	70	90	70	77.25	KISORO-Kigezi	63		KISORO-Kigezi	63	77.25		4	20.4427	8.5573
83	89	96	74	85.5	LYANTONDE- South Buganda	64		LYANTONDE- South Buganda	64	85.5		5	38.6657	-9.66568
65	59	67	71	65.5	KAMULI-Busoga	68		KAMULI-Busoga	68	65.5		6	40.8971	-11.8971
64	77	63	75	69.75	MOROTO-Karamoja	68		MOROTO-Karamoja	68	69.75		7	56.5168	-27.5168
82	78	75	78	78.25	BULIISA-Bunyoro	71		BULIISA-Bunyoro	71	78.25		8	36.4343	-6.4343
79	73	88	81	80.25	KUMI-Teso	71		KUMI-Teso	71	80.25		9	51.3102	-20.3102
87	72	92	84	83.75	ABIM-Karamoja	71		ABIM-Karamoja	71	83.75		10	39.0376	-7.03758
82	84	81	77	81	YUMBE-West Nile	72		YUMBE-West Nile	72	81		11	39.0376	-7.03758
58	63	71	79	67.75	NGORA-Teso	74		NGORA-Teso	74	67.75		12	45.7317	-12.7317
79	77	81	74	77.75	BUGIRI-Busoga	74		BUGIRI-Busoga	74	77.75		13	41.269	-7.26897
82	72	79	76	77.25	KAGADI-Bunyoro	76		KAGADI-Bunyoro	76	77.25		14	55.773	-21.773
60	63	79	69	67.75	AMURIA-Teso	77		AMURIA-Teso	77	67.75		15	48.335	-13.335
85	73	79	79	79	MASINDI-Bunyoro	77		MASINDI-Bunyoro	77	79		16	58.3763	-23.3763
57	70	65	72	66	RUKUNGIRI-Kigezi	78		RUKUNGIRI-Kigezi	78	66		17	45.3598	-9.35984
69	72	69	72	70.5	JINJA D-Busoga	78		JINJA D-Busoga	78	70.5		18	43.1285	-5.12845
61	64	67	64	64	MAYUGE-Busoga	79		MAYUGE-Busoga	79	64		19	48.335	-10.335
60	81	90	76	76.75	KATAKWI-Teso	79		KATAKWI-Teso	79	76.75		20	53.9135	-15.9135
69	81	79	83	78	IGANGA-Busoga	80		IGANGA-Busoga	80	78		21	59.12	-21.12
91	81	92	79	85.75	NEBBI-West Nile	80		NEBBI-West Nile	80	85.75		22	59.12	-20.12
65	73	79	74	72.75	KYOTERA- South Buganda	81		KYOTERA- South Buganda	81	72.75		23	55.0292	-15.0292
88	89	88	73	84.5	ADJUMANI-West Nile	81		ADJUMANI-West Nile	81	84.5		24	67.6737	-27.6737
74	69	58	38	59.75	LIRA-Lango	83		LIRA-Lango	83	59.75		25	57.6325	-16.6325
63	70	67	64	66	KALAKI-Teso	83		KALAKI-Teso	83	66		26	50.9383	-8.9383
68	80	79	78	76.25	SOROTI CITY-Teso	83		SOROTI CITY-Teso	83	76.25		27	53.1697	-11.1697
86	88	88	73	83.75	KABERAMAIDO-Teso	83		KABERAMAIDO-Teso	83	83.75		28	45.3598	-2.35984
82	91	79	84	84	GULU C-Acholi	86		GULU C-Acholi	86	84		29	77.343	-34.343
68	67	56	76	66.75	KANUNGU-Kigezi	87		KANUNGU-Kigezi	87	66.75		30	68.7894	-24.7894
79	78	79	92	82	HOIMA C-Bunyoro	88		HOIMA C-Bunyoro	88	82		31	54.6573	-9.65728
81	81	94	83	84.75	BUTEBO-Bukedi	88		BUTEBO-Bukedi	88	84.75		32	54.6573	-9.65728
85	88	90	82	86.25	MBALE D - Bugisu Elgon	88		MBALE D - Bugisu Elgon	88	86.25		33	66.1861	-20.1861
90	92	96	80	89.5	KABALE-Kigezi	88		KABALE-Kigezi	88	89.5		34	52.4259	-3.42589
92	97	94	86	92.25	BUTALEJA-Bukedi	88		BUTALEJA-Bukedi	88	92.25		35	36.8062	17.1938
74	94	77	81	81.5	AGAGO-Acholi	90		AGAGO-Acholi	90	81.5		36	52.7978	1.20221
76	77	77	75	76.25	FORT PORTAL C- Tooro	92		FORT PORTAL C- Tooro	92	76.25		37	55.0292	0.970827
68	38	69	61	59	KABAROLE- Tooro	94		KABAROLE- Tooro	94	59		38	49.4507	7.54929
92	86	88	76	85.5	BUDUDA-Bugisu Elgon	94		BUDUDA-Bugisu Elgon	94	85.5		39	56.8887	0.111339
85	83	85	90	85.75	OYAM-Lango	95		OYAM-Lango	95	85.75		40	65.8142	-4.8142
89	84	81	80	83.5	MANAFWA- Bugisu Elgon	98		MANAFWA- Bugisu Elgon	98	83.5		41	49.8226	12.1774
												42	52.7978	10.2022
												43	69.9051	-6.90507
												44	82.1777	-18.1777
												45	52.4259	15.5741
												46	58.7481	9.25185
												47	71.3927	-0.392664
												48	74.3678	-3.36784
												49	79.5744	-8.57441
												50	75.4835	-3.48354
												51	55.773	18.227
												52	70.6489	3.35113
												53	69.9051	6.09493
												54	55.773	21.227
												55	72.5084	4.49164
												56	53.1697	24.8303
												57	59.8638	18.1362
												58	50.1945	28.8055
												59	69.1613	9.83872
												60	71.0208	8.97923
												61	82.5496	-2.54959
												62	63.2109	17.7891
												63	80.6901	0.309898
												64	43.8722	39.1278
												65	53.1697	29.8303
												66	68.4175	14.5825
												67	79.5744	3.42559
												68	79.9463	6.05369
												69	54.2854	32.7146
												70	76.9711	11.0289
												71	81.062	6.938
												72	83.2934	4.70662
												73	88.1281	-0.128052
												74	92.2189	-4.21892
												75	76.2273	13.7727
												76	68.4175	23.5825
												77	42.7566	51.2434
												78	82.1777	11.8223
												79	82.5496	12.4504
												80	79.2025	18.7975

## Sheet: 6.4Func-TargetedResUHC
SNUs (Districts)- Region	UHC-SCI	Functionality F4TargetedRes
KASESE-Tooro	29	48.8
AMUDAT-Karamoja	54	51		SUMMARY OUTPUT
LWENGO- South Buganda	27	54
BUYENDE-Busoga	38	54.6		Regression Statistics
GOMBA-South Buganda	26	54.8		Multiple R	0.649958
LUUKA-Busoga	32	55.4		R Square	0.422445
BUGWERI-Busoga	34	57		Adjusted R Square	0.41504
MASAKA D- South Buganda	29	57.4		Standard Error	17.1328
BUKOMANSIMBI-South Buganda	32	58.2		Observations	80
KAPELEBYONG-Teso	30	58.4
KALIRO-Busoga	43	58.6		ANOVA
BUKEDEA-Teso	42	58.8			df	SS	MS	F	Significance F
KABAROLE- Tooro	94	58.8		Regression	1	16746.6	16746.6	57.052	6.86473e-11
MAYUGE-Busoga	79	59.6		Residual	78	22895.6	293.533
HOIMA D-Bunyoro	36	60.6		Total	79	39642.2
SERERE-Teso	29	61.4
TEREGO-West Nile	57	61.4			Coefficients	Standard Error	t Stat	P-value	Lower 95%	Upper 95%	Lower 95.0%	Upper 95.0%
NAMAYINGO-Busoga	31	61.8		Intercept	-40.9209	13.4519	-3.04201	0.00320065	-67.7016	-14.1401	-67.7016	-14.1401
LIRA-Lango	83	61.8		Functionality F4TargetedRes	1.4311	0.189468	7.55328	6.86473e-11	1.0539	1.80831	1.0539	1.80831
RAKAI- South Buganda	63	62.2
KALUNGU- South Buganda	49	62.8
KALAKI-Teso	83	63
JINJA D-Busoga	78	63.6		RESIDUAL OUTPUT
RUBANDA-Kigezi	42	63.8
KALANGALA- South Buganda	26	64		Observation	Predicted UHC-SCI	Residuals
KIBAALE-Bunyoro	38	64.4		1	28.917	0.0829738
BUTAMBALA-South Buganda	54	64.4		2	32.0655	21.9345
JINJA CITY-Busoga	35	64.8		3	36.3588	-9.35877
PAKWACH-West Nil	33	65		4	37.2174	0.782566
MPIGI- South Buganda	56	66.4		5	37.5037	-11.5037
ARUA CITY-West Nile	62	66.4		6	38.3623	-6.36232
NAMUTUMBA-Busoga	38	66.6		7	40.6521	-6.65208
MOROTO-Karamoja	68	66.6		8	41.2245	-12.2245
GULU-Acholi	45	67		9	42.3694	-10.3694
SEMBABULE-S South Buganda	57	67.2		10	42.6556	-12.6556
KAMULI-Busoga	68	67.2		11	42.9419	0.0581476
KIKUUBE-Bunyoro	29	68.6		12	43.2281	-1.22807
KANUNGU-Kigezi	87	68.6		13	43.2281	50.7719
NABILATUK-Karamoja	39	69.2		14	44.373	34.627
RUKUNGIRI-Kigezi	78	69.4		15	45.8041	-9.80406
RUKIGA-Kigezi	41	69.6		16	46.9489	-17.9489
ALEBTONG-Lango	45	69.8		17	46.9489	10.0511
KWANIA-Lango	38	70		18	47.5214	-16.5214
NTOROKO-Tooro	40	70		19	47.5214	35.4786
KYOTERA- South Buganda	81	70		20	48.0938	14.9062
NAKAPIRIPIRIT-Karamoja	34	70.2		21	48.9525	0.0475078
NGORA-Teso	74	70.2		22	49.2387	33.7613
OBONGI-West Nile	35	71.2		23	50.0974	27.9026
AMURIA-Teso	77	71.2		24	50.3836	-8.3836
BUGIRI-Busoga	74	73.2		25	50.6698	-24.6698
OTUKE-Lango	40	74.4		26	51.2423	-13.2423
MOYO-West Nile	61	74.8		27	51.2423	2.75774
LAMWO-Acholi	44	75.4		28	51.8147	-16.8147
AMURU-Acholi	46	75.6		29	52.1009	-19.1009
KATAKWI-Teso	79	76.4		30	54.1045	1.89553
IGANGA-Busoga	80	76.8		31	54.1045	7.89553
KAGADI-Bunyoro	76	77.4		32	54.3907	-16.3907
BULIISA-Bunyoro	71	78		33	54.3907	13.6093
KISORO-Kigezi	63	78.4		34	54.9631	-9.96313
MASINDI-Bunyoro	77	78.4		35	55.2494	1.75065
SOROTI CITY-Teso	83	78.6		36	55.2494	12.7506
ABIM-Karamoja	71	79.8		37	57.2529	-28.2529
KUMI-Teso	71	80		38	57.2529	29.7471
YUMBE-West Nile	72	81.2		39	58.1116	-19.1116
NEBBI-West Nile	80	82.2		40	58.3978	19.6022
AGAGO-Acholi	90	82.4		41	58.684	-17.684
LYANTONDE- South Buganda	64	82.6		42	58.9702	-13.9702
FORT PORTAL C- Tooro	92	82.6		43	59.2564	-21.2564
MANAFWA- Bugisu Elgon	98	83.2		44	59.2564	-19.2564
HOIMA C-Bunyoro	88	83.4		45	59.2564	21.7436
KABERAMAIDO-Teso	83	83.6		46	59.5427	-25.5427
BUTEBO-Bukedi	88	83.8		47	59.5427	14.4573
ADJUMANI-West Nile	81	84		48	60.9738	-25.9738
MBALE D - Bugisu Elgon	88	85.2		49	60.9738	16.0262
GULU C-Acholi	86	85.6		50	63.836	10.164
KOLE-Lango	43	86.4		51	65.5533	-25.5533
KABALE-Kigezi	88	86.4		52	66.1257	-5.12575
BUDUDA-Bugisu Elgon	94	86.6		53	66.9844	-22.9844
OYAM-Lango	95	86.8		54	67.2706	-21.2706
BUTALEJA-Bukedi	88	93		55	68.4155	10.5845
				56	68.988	11.012
				57	69.8466	6.15338
				58	70.7053	0.294716
				59	71.2777	-8.27773
				60	71.2777	5.72227
				61	71.5639	11.4361
				62	73.2813	-2.28127
				63	73.5675	-2.56749
				64	75.2848	-3.28482
				65	76.7159	3.28408
				66	77.0021	12.9979
				67	77.2884	-13.2884
				68	77.2884	14.7116
				69	78.147	19.853
				70	78.4332	9.56675
				71	78.7195	4.28053
				72	79.0057	8.99431
				73	79.2919	1.70809
				74	81.0092	6.99076
				75	81.5817	4.41832
				76	82.7266	-39.7266
				77	82.7266	5.27344
				78	83.0128	10.9872
				79	83.299	11.701
				80	92.1719	-4.17185
