# Supplementary material for: Validating Uganda's Subnational Health Systems Functionality Index for Universal Health Coverage Outcomes and Revealing Capacity Gaps in Access, Quality, Demand, and Resilience
Source: Research Square preprint supplement (doi:10.21203/rs.3.rs-5743811/v1), 2025-06-04
Supplement: Supplementary file 3 [file 2df4fb5e695751cd039630ca.xlsx]

## Sheet: 1.F4CorADQR 
	UHC-SCI	Functionality
ABIM	72.9167	78.9362
ADJUMANI	85.4167	88.5106
AGAGO	93.0556	79.0598
ALEBTONG	45.1389	72.5636
AMUDAT	60.0694	57.1739
AMURIA	86.1111	75.2128
AMURU	45.8333	79.2553
ARUA CITY	64.2361	62.3932
BUDUDA	90.625	87.4468
BUGIRI	76.0417	78.2839
BUGWERI	36.4583	61.2869
BUKEDEA	42.0139	56.3559
BUKOMANSIMBI	31.9444	53.0983
BULIISA	68.75	83.9662
BUTALEJA	89.5833	90.8228
BUTAMBALA	54.1667	63.0851
BUTEBO	87.1528	82.7331
BUYENDE	38.1944	52.3504
FORT PORTAL CITY	95.8333	82.4895
GOMBA	26.0417	51.7167
GULU	45.4861	68.5897
GULU CITY	85.4167	85.911
HOIMA	33.6806	64.2553
HOIMA CITY	91.3194	87.3418
IGANGA	86.4583	76.0549
JINJA CITY	34.375	59.2949
JINJA DISTRICT	73.9583	65.7173
KABALE	88.1944	83.6498
KABAROLE	95.8333	71.03
KABERAMAIDO	88.1944	86.5957
KAGADI	79.1667	80.0847
KALAKI	85.0694	65.9188
KALANGALA	25	58.5443
KALIRO	44.0972	67.7966
KALUNGU	47.9167	62.4454
KAMULI	71.1806	68.3263
KANUNGU	89.2361	74.1489
KAPELEBYONG	31.5972	54.5455
KASESE	29.1667	38.0482
KATAKWI	77.0833	70.7265
KIBAALE	38.8889	66.2815
KIKUUBE	29.8611	67.5847
KISORO	61.8056	82.5431
KOLE	45.1389	86.6525
KUMI	70.8333	80.2966
KWANIA	38.5417	67.6907		SUMMARY OUTPUT
KYOTERA	79.1667	67.6907
LAMWO	43.0556	71.7021		Regression Statistics
LIRA	86.1111	63.4615		Multiple R	0.638621
LUUKA	34.0278	62.6609		R Square	0.407837
LWENGO	27.0833	51.4831		Adjusted R Square	0.400245
LYANTONDE	60.0694	82.3718		Standard Error	17.9982
MANAFWA	97.9167	85.2754		Observations	80
MASAKA CITY	30.2083	75.8475
MASINDI	74.6528	82.7004		ANOVA
MAYUGE	80.2083	61.3347			df	SS	MS	F	Significance F
MBALE	92.7083	83.5805		Regression	1	17401.9	17401.9	53.7204	1.84892e-10
MOROTO	66.6667	68.4322		Residual	78	25266.9	323.934
MOYO	57.6389	78.903		Total	79	42668.8
MPIGI	55.9028	65.9188
NABILATUK	42.3611	71.2924			Coefficients	Standard Error	t Stat	P-value	Lower 95%	Upper 95%	Lower 95.0%	Upper 95.0%
NAKAPIRIPIRIT	32.2917	69.8312		Intercept	-38.342	13.6489	-2.80917	0.00627494	-65.5149	-11.1691	-65.5149	-11.1691
NAMAYINGO	32.6389	67.8419		X Variable 1	1.38832	0.189418	7.32942	1.84892e-10	1.01122	1.76542	1.01122	1.76542
NAMUTUMBA	37.1528	70.0212
NEBBI	78.8194	88.2415
NGORA	78.4722	70.4255
NTOROKO	40.2778	70.7265		RESIDUAL OUTPUT
OBONGI	29.5139	74.5745
OTUKE	40.625	73.5169		Observation	Predicted Y	Residuals
OYAM	96.5278	82.8326		1	71.2467	1.66998
PAKWACH	31.9444	70.9402		2	84.5391	0.877549
RAKAI	62.1528	64.089		3	71.4184	21.6372
RUBANDA	40.625	63.0297		4	62.3995	-17.2606
RUKIGA	42.7083	66.7373		5	41.0337	19.0357
RUKUNGIRI	80.5556	69.7872		6	66.0774	20.0337
SEMBABULE	56.9444	64.9573		7	71.6898	-25.8564
SERERE	27.7778	58.944		8	48.2797	15.9564
SOROTI CITY	88.5417	77.8723		9	83.0622	7.56282
TEREGO	66.6667	66.413		10	70.3411	5.70054
YUMBE	79.1667	81.3305		11	46.7439	-10.2855
				12	39.8981	2.1158
				13	35.3754	-3.43099
				14	78.23	-9.48004
				15	87.7491	1.83422
				16	49.2403	4.92633
				17	76.518	10.6348
				18	34.3372	3.85728
				19	76.1798	19.6536
				20	33.4574	-7.41573
				21	56.8825	-11.3964
				22	80.93	4.48666
				23	50.865	-17.1844
				24	82.9164	8.40309
				25	67.2465	19.2118
				26	43.9783	-9.60328
				27	52.8947	21.0637
				28	77.7907	10.4037
				29	60.2705	35.5629
				30	81.8806	6.31381
				31	72.8413	6.32539
				32	53.1744	31.895
				33	42.9362	-17.9362
				34	55.7814	-11.6842
				35	48.3522	-0.435572
				36	56.5168	14.6638
				37	64.6005	24.6356
				38	37.3846	-5.78734
				39	14.4812	14.6855
				40	59.849	17.2343
				41	53.678	-14.7891
				42	55.4873	-25.6262
				43	76.2543	-14.4487
				44	81.9595	-36.8206
				45	73.1354	-2.30208
				46	55.6343	-17.0927
				47	55.6343	23.5323
				48	61.2035	-18.148
				49	49.7629	36.3482
				50	48.6515	-14.6237
				51	33.133	-6.04963
				52	76.0164	-15.947
				53	80.0476	17.8691
				54	66.9586	-36.7502
				55	76.4727	-1.8199
				56	46.8103	33.3981
				57	77.6945	15.0138
				58	56.6638	10.0028
				59	71.2006	-13.5617
				60	53.1744	2.72836
				61	60.6346	-18.2735
				62	58.6061	-26.3144
				63	55.8443	-23.2054
				64	58.8698	-21.7171
				65	84.1655	-5.34606
				66	59.4312	19.041
				67	59.849	-19.5713
				68	65.1912	-35.6774
				69	63.7231	-23.0981
				70	76.6562	19.8716
				71	60.1457	-28.2012
				72	50.634	11.5187
				73	49.1634	-8.53836
				74	54.3107	-11.6024
				75	58.545	22.0105
				76	51.8395	5.10495
				77	43.4911	-15.7133
				78	69.7698	18.7719
				79	53.8606	12.8061
				80	74.5707	4.59592
