# Supplementary material for: Validating Uganda's Subnational Health Systems Functionality Index for Universal Health Coverage Outcomes and Revealing Capacity Gaps in Access, Quality, Demand, and Resilience
Source: Research Square preprint supplement (doi:10.21203/rs.3.rs-5743811/v1), 2025-06-04
Supplement: Supplementary file 4 [file 6f78ff7ca8c99f4806813119.xlsx]

## Sheet: 18.FA-UHC
	UHC-SCI	Func-Access
ABIM	71.4286	84
ADJUMANI	81.25	73		SUMMARY OUTPUT
AGAGO	90.1786	81.25
ALEBTONG	44.6429	45.1923		Regression Statistics
AMUDAT	54.4643	55		Multiple R	0.823051
AMURIA	76.7857	69		R Square	0.677413
AMURU	45.5357	49		Adjusted R Square	0.673278
ARUA CITY	61.6071	61.4583		Standard Error	12.8108
BUDUDA	93.75	76		Observations	80
BUGIRI	74.1071	74.0385
BUGWERI	33.9286	39.8148		ANOVA
BUKEDEA	41.9643	46.1538			df	SS	MS	F	Significance F
BUKOMANSIMBI	32.1429	41.6667		Regression	1	26881.6	26881.6	163.796	7.47711e-21
BULIISA	71.4286	77.7778		Residual	78	12801.1	164.117
BUTALEJA	87.5	86.1111		Total	79	39682.7
BUTAMBALA	54.4643	68
BUTEBO	87.5	82.6923			Coefficients	Standard Error	t Stat	P-value	Lower 95%	Upper 95%	Lower 95.0%	Upper 95.0%
BUYENDE	37.5	35.4167		Intercept	-7.50195	5.43672	-1.37987	0.17157	-18.3256	3.32172	-18.3256	3.32172
FORT PORTAL CITY	91.9643	75		X Variable 1	1.08295	0.0846167	12.7983	7.47711e-21	0.914487	1.2514	0.914487	1.2514
GOMBA	25.8929	42.3913
GULU	44.6429	46.875
GULU CITY	85.7143	83.6538
HOIMA	35.7143	47		RESIDUAL OUTPUT
HOIMA CITY	88.3929	91.6667
IGANGA	80.3571	83.3333		Observation	Predicted Y	Residuals
JINJA CITY	34.8214	68.75		1	83.4655	-12.0369
JINJA D	77.6786	72.2222		2	71.5531	9.69689
KABALE	88.3929	79.6296		3	80.4874	9.69115
KABAROLE	93.75	60.8696		4	41.4389	3.20398
KABERAMAIDO	83.0357	73		5	52.0601	2.4042
KAGADI	75.8929	75.9615		6	67.2213	9.56439
KALAKI	83.0357	63.5417		7	45.5624	-0.0266915
KALANGALA	25.8929	41.6667		8	59.0541	2.55303
KALIRO	42.8571	55.7692		9	74.8019	18.9481
KALUNGU	49.1071	71.0526		10	72.6777	1.42943
KAMULI	67.8571	71.1538		11	35.6153	-1.68677
KANUNGU	86.6071	76		12	42.4802	-0.515889
KAPELEBYONG	30.3571	33.3333		13	37.6208	-5.47794
KASESE	28.5714	44.4444		14	76.7272	-5.29862
KATAKWI	78.5714	76.0417		15	85.7517	1.74826
KIBAALE	37.5	39.2857		16	66.1384	-11.6741
KIKUUBE	29.4643	45.1923		17	82.0494	5.45064
KISORO	62.5	70.4545		18	30.8524	6.64761
KOLE	42.8571	50		19	73.719	18.2453
KUMI	70.5357	80.7692		20	38.4055	-12.5127
KWANIA	38.3929	44.2308		21	43.2611	1.38171
KYOTERA	81.25	74.0385		22	83.0907	2.62363
LAMWO	43.75	50		23	43.3965	-7.68223
LIRA	83.0357	37.5		24	91.7681	-3.37525
LUUKA	32.1429	29.3478		25	82.7436	-2.38641
LWENGO	26.7857	42.3077		26	66.9506	-32.1292
LYANTONDE	64.2857	73.9583		27	70.7108	6.96775
MANAFWA	98.2143	79.8077		28	78.7326	9.66021
MASAKA CITY	29.4643	76.9231		29	58.4165	35.3335
MASINDI	76.7857	78.7037		30	71.5531	11.4826
MAYUGE	79.4643	64.4231		31	74.7603	1.13256
MBALE	88.3929	81.7308		32	61.3102	21.7255
MOROTO	67.8571	75		33	37.6208	-11.7279
MOYO	60.7143	77.7778		34	52.8931	-10.036
MPIGI	56.25	64.5833		35	69.4442	-20.3371
NABILATUK	39.2857	47.1154		36	69.5538	-1.69668
NAKAPIRIPIRIT	33.9286	37.963		37	74.8019	11.8052
NAMAYINGO	31.25	41.6667		38	28.5963	1.76089
NAMUTUMBA	37.5	50		39	40.629	-12.0576
NEBBI	80.3571	78.8462		40	74.8471	3.72436
NGORA	74.1071	79		41	35.0424	2.45764
NTOROKO	40.1786	42.7083		42	41.4389	-11.9746
OBONGI	34.8214	42		43	68.7965	-6.29652
OTUKE	40.1786	50		44	46.6454	-3.78821
OYAM	94.6429	90.2174		45	79.9668	-9.43106
PAKWACH	33.0357	44.7917		46	40.3976	-2.00473
RAKAI	62.5	72.1154		47	72.6777	8.57229
RUBANDA	41.9643	35.5769		48	46.6454	-2.89535
RUKIGA	41.0714	42.3077		49	33.1085	49.9272
RUKUNGIRI	77.6786	72		50	24.2802	7.8627
SEMBABULE	57.1429	69.7917		51	38.315	-11.5293
SERERE	28.5714	39.7727		52	72.5909	-8.30522
SOROTI CITY	83.0357	78		53	78.9255	19.2888
TEREGO	57.1429	52.5		54	75.8016	-46.3373
YUMBE	72.3214	77.1739		55	77.7299	-0.944201
				56	62.2648	17.1995
				57	81.0081	7.38479
				58	73.719	-5.86186
				59	76.7272	-16.0129
				60	62.4383	-6.18832
				61	43.5215	-4.23575
				62	33.6099	0.318681
				63	37.6208	-6.3708
				64	46.6454	-9.14535
				65	77.8842	2.47296
				66	78.0508	-3.94365
				67	38.7489	1.4297
				68	37.9818	-3.16035
				69	46.6454	-6.46678
				70	90.1986	4.44424
				71	41.005	-7.96929
				72	70.5951	-8.09512
				73	31.0259	10.9383
				74	38.315	2.75643
				75	70.4702	7.20841
				76	68.0787	-10.9358
				77	35.5698	-6.99834
				78	76.9678	6.06787
				79	49.3527	7.79014
				80	76.0732	-3.75181

## Sheet: 19.FA-UHC Kigezi
	UHC-SCI	Func-Access			SUMMARY OUTPUT
KABALE	88.3929	79.6296
KANUNGU	86.6071	76			Regression Statistics
KISORO	62.5	70.4545			Multiple R	0.946996
RUBANDA	41.9643	35.5769			R Square	0.896801
RUKIGA	41.0714	42.3077			Adjusted R Square	0.871002
RUKUNGIRI	77.6786	72			Standard Error	7.65796
					Observations	6
					ANOVA
						df	SS	MS	F	Significance F
					Regression	1	2038.49	2038.49	34.7602	0.00413968
					Residual	4	234.577	58.6443
					Total	5	2273.07
						Coefficients	Standard Error	t Stat	P-value	Lower 95%	Upper 95%	Lower 95.0%	Upper 95.0%
					Intercept	-1.03687	11.8527	-0.0874803	0.934494	-33.9451	31.8714	-33.9451	31.8714
					Func-Access	1.07572	0.182455	5.89578	0.00413968	0.569139	1.58229	0.569139	1.58229
					RESIDUAL OUTPUT
					Observation	Predicted UHC-SCI	Residuals
					1	84.622	3.77089
					2	80.7175	5.88962
					3	74.7522	-12.2522
					4	37.2338	4.73051
					5	44.4742	-3.40275
					6	76.4147	1.26392

## Sheet: 20.FA-UHC Busoga
	UHC-SCI	Func-Access			SUMMARY OUTPUT
BUGIRI	74.1071	74.0385
BUGWERI	33.9286	39.8148			Regression Statistics
BUYENDE	37.5	35.4167			Multiple R	0.816208
IGANGA	80.3571	83.3333			R Square	0.666195
JINJA CITY	34.8214	68.75			Adjusted R Square	0.632814
JINJA D	77.6786	72.2222			Standard Error	12.7972
KALIRO	42.8571	55.7692			Observations	12
KAMULI	67.8571	71.1538
LUUKA	32.1429	29.3478			ANOVA
MAYUGE	79.4643	64.4231				df	SS	MS	F	Significance F
NAMAYINGO	31.25	41.6667			Regression	1	3268.44	3268.44	19.9576	0.00120227
NAMUTUMBA	37.5	50			Residual	10	1637.69	163.769
					Total	11	4906.13
						Coefficients	Standard Error	t Stat	P-value	Lower 95%	Upper 95%	Lower 95.0%	Upper 95.0%
					Intercept	-3.42429	13.0425	-0.262549	0.798228	-32.4847	25.6361	-32.4847	25.6361
					Func-Access	0.977578	0.218825	4.46739	0.00120227	0.490005	1.46515	0.490005	1.46515
					RESIDUAL OUTPUT
					Observation	Predicted UHC-SCI	Residuals
					1	68.954	5.1531
					2	35.4978	-1.56921
					3	31.1982	6.30175
					4	78.0405	2.31664
					5	63.7842	-28.9627
					6	67.1785	10.5
					7	51.0945	-8.23731
					8	66.1341	1.72303
					9	25.2655	6.87737
					10	59.5543	19.91
					11	37.3081	-6.05811
					12	45.4546	-7.95459

## Sheet: 21. Func-HS Health Security
	Functionality All	Health Security
ABIM	80.8696	66.4773		SUMMARY OUTPUT
ADJUMANI	83.913	95.4545
AGAGO	80.7018	79.5455		Regression Statistics
ALEBTONG	70.0431	44.3182		Multiple R	0.302428
AMUDAT	49.3182	71.0227		R Square	0.0914626
AMURIA	68.4783	51.1364		Adjusted R Square	0.0798147
AMURU	76.3043	89.2045		Standard Error	19.8787
ARUA CITY	66.0088	64.7727		Observations	80
BUDUDA	86.9565	89.7727
BUGIRI	73.7069	60.2273		ANOVA
BUGWERI	56.4103	31.8182			df	SS	MS	F	Significance F
BUKEDEA	59.0517	36.3636		Regression	1	3102.91	3102.91	7.85228	0.00639929
BUKOMANSIMBI	56.7982	31.25		Residual	78	30822.6	395.161
BULIISA	78.8462	81.8182		Total	79	33925.5
BUTALEJA	92.094	89.2045
BUTAMBALA	63.0435	59.0909			Coefficients	Standard Error	t Stat	P-value	Lower 95%	Upper 95%	Lower 95.0%	Upper 95.0%
BUTEBO	82.5431	29.5455		Intercept	16.2635	15.359	1.05889	0.292919	-14.314	46.841	-14.314	46.841
BUYENDE	54.8246	89.7727		X Variable 1	0.608205	0.217046	2.80219	0.00639929	0.176099	1.04031	0.176099	1.04031
FORT PORTAL CITY	81.4103	25
GOMBA	52.4336	44.3182
GULU	67.7632	82.9545
GULU CITY	85.1293	36.3636		RESIDUAL OUTPUT
HOIMA	62.1739	80.1136
HOIMA CITY	83.3333	72.1591		Observation	Predicted Y	Residuals
IGANGA	75.641	35.2273		1	65.4488	1.02848
JINJA CITY	60.7456	54.5455		2	67.2998	28.1547
JINJA D	64.7436	88.0682		3	65.3467	14.1987
KABALE	85.6838	81.25		4	58.8641	-14.5459
KABAROLE	60.3982	88.0682		5	46.2591	24.7637
KABERAMAIDO	83.0435	71.0227		6	57.9123	-6.77597
KAGADI	78.2328	75		7	62.6722	26.5323
KALAKI	62.5	31.8182		8	56.4104	8.36235
KALANGALA	62.8205	30.1136		9	69.1509	20.6218
KALIRO	59.2672	61.3636		10	61.0924	-0.865144
KALUNGU	62.3853	60.7955		11	50.5725	-18.7543
KAMULI	67.4569	92.6136		12	52.1791	-15.8154
KANUNGU	69.7826	28.9773		13	50.8085	-19.5585
KAPELEBYONG	56.982	39.7727		14	64.2181	17.6
KASESE	45.1389	72.1591		15	72.2756	16.929
KATAKWI	71.9298	37.5		16	54.6069	4.48404
KIBAALE	65.0424	61.9318		17	66.4666	-36.9212
KIKUUBE	68.75	38.6364		18	49.6081	40.1646
KISORO	77.9018	77.2727		19	65.7776	-40.7776
KOLE	85.1293	46.5909		20	48.1539	-3.83572
KUMI	79.5259	68.1818		21	57.4774	25.4771
KWANIA	68.5345	39.7727		22	68.0396	-31.676
KYOTERA	68.75	68.1818		23	54.078	26.0356
LAMWO	73.6957	44.8864		24	66.9473	5.21182
LIRA	63.1579	82.9545		25	62.2688	-27.0415
LUUKA	56.6372	40.3409		26	53.2093	1.33616
LWENGO	52.3707	23.2955		27	55.6409	32.4273
LYANTONDE	81.3596	62.5		28	68.3768	12.8732
MANAFWA	84.2672	88.6364		29	52.998	35.0702
MASAKA CITY	79.3103	36.3636		30	66.771	4.25175
MASINDI	79.9145	76.1364		31	63.8451	11.1549
MAYUGE	59.6983	64.7727		32	54.2763	-22.4581
MBALE	84.4828	85.2273		33	54.4713	-24.3576
MOROTO	66.3793	59.6591		34	52.3101	9.05349
MOYO	74.5726	80.6818		35	54.2066	6.58888
MPIGI	66.0088	61.3636		36	57.2911	35.3225
NABILATUK	67.2414	44.3182		37	58.7056	-29.7284
NAKAPIRIPIRIT	69.4444	33.5227		38	50.9202	-11.1475
NAMAYINGO	63.8158	30.6818		39	43.7172	28.4419
NAMUTUMBA	65.7328	38.6364		40	60.0116	-22.5116
NEBBI	83.1897	78.9773		41	55.8226	6.10921
NGORA	68.2609	71.0227		42	58.0776	-19.4412
NTOROKO	73.2456	46.0227		43	63.6438	13.629
OBONGI	66.5217	38.6364		44	68.0396	-21.4487
OTUKE	73.4914	41.4773		45	64.6315	3.55028
OYAM	86.9469	90.3409		46	57.9465	-18.1738
PAKWACH	65.7895	38.0682		47	58.0776	10.1042
RAKAI	64.8707	67.0455		48	61.0856	-16.1992
RUBANDA	63.7931	34.6591		49	54.6765	28.2781
RUKIGA	66.5948	40.9091		50	50.7105	-10.3696
RUKUNGIRI	67.3913	65.3409		51	48.1156	-24.8202
SEMBABULE	67.3246	32.9545		52	65.7469	-3.24686
SERERE	58.7054	67.0455		53	67.5153	21.1211
SOROTI CITY	76.3043	60.2273		54	64.5005	-28.1368
TEREGO	57.0455	56.8182		55	64.8679	11.2684
YUMBE	81.4159	73.8636		56	52.5723	12.2004
				57	67.6464	17.5809
				58	56.6357	3.02335
				59	61.619	19.0628
				60	56.4104	4.95326
				61	57.1601	-12.8419
				62	58.5	-24.9772
				63	55.0766	-24.3948
				64	56.2425	-17.6061
				65	66.8599	12.1174
				66	57.7801	13.2426
				67	60.8119	-14.7891
				68	56.7224	-18.086
				69	60.9613	-19.4841
				70	69.1451	21.1959
				71	56.277	-18.2088
				72	55.7182	11.3273
				73	55.0628	-20.4037
				74	56.7668	-15.8577
				75	57.2512	8.08967
				76	57.2106	-24.2561
				77	51.9684	15.0771
				78	62.6722	-2.44493
				79	50.9588	5.85934
				80	65.7811	8.08255
