# Supplementary material for: Validating Uganda's Subnational Health Systems Functionality Index for Universal Health Coverage Outcomes and Revealing Capacity Gaps in Access, Quality, Demand, and Resilience
Source: Research Square preprint supplement (doi:10.21203/rs.3.rs-5743811/v1), 2025-06-04
Supplement: Supplementary file 5 [file 8ffb7fb5bb9bd7b91bce4784.xlsx]

## Sheet: Func-Res UHC
Row Labels	UHC-SCI	Func- Resilience
ABIM	71.4286	79.8387
ADJUMANI	81.25	86.2903		SUMMARY OUTPUT
AGAGO	90.1786	77.8226
ALEBTONG	44.6429	79.8387		Regression Statistics
AMUDAT	54.4643	44.7581		Multiple R	0.394224
AMURIA	76.7857	67.7419		R Square	0.155413
AMURU	45.5357	85.0806		Adjusted R Square	0.144585
ARUA CITY	61.6071	68.9516		Standard Error	20.7289
BUDUDA	93.75	91.5323		Observations	80
BUGIRI	74.1071	71.371
BUGWERI	33.9286	61.2903		ANOVA
BUKEDEA	41.9643	58.871			df	SS	MS	F	Significance F
BUKOMANSIMBI	32.1429	59.2742		Regression	1	6167.2	6167.2	14.3528	0.000296595
BULIISA	71.4286	80.2419		Residual	78	33515.5	429.686
BUTALEJA	87.5	93.1452		Total	79	39682.7
BUTAMBALA	54.4643	58.4677
BUTEBO	87.5	80.6452			Coefficients	Standard Error	t Stat	P-value	Lower 95%	Upper 95%	Lower 95.0%	Upper 95.0%
BUYENDE	37.5	56.0484		Intercept	4.58871	14.7097	0.311951	0.75591	-24.696	33.8735	-24.696	33.8735
FORT PORTAL CITY	91.9643	86.2903		X Variable 1	0.769166	0.203026	3.78851	0.000296595	0.364972	1.17336	0.364972	1.17336
GOMBA	25.8929	52.8226
GULU	44.6429	73.7903
GULU CITY	85.7143	85.4839
HOIMA	35.7143	68.9516		RESIDUAL OUTPUT
HOIMA CITY	88.3929	81.8548
IGANGA	80.3571	70.1613		Observation	Predicted Y	Residuals
JINJA CITY	34.8214	53.2258		1	65.9979	5.43062
JINJA DISTRICT	77.6786	58.871		2	70.9603	10.2897
KABALE	88.3929	84.6774		3	64.4472	25.7314
KABAROLE	93.75	64.5161		4	65.9979	-21.3551
KABERAMAIDO	83.0357	85.0806		5	39.0151	15.4492
KAGADI	75.8929	80.6452		6	56.6935	20.0922
KALAKI	83.0357	59.2742		7	70.0299	-24.4942
KALANGALA	25.8929	68.1452		8	57.624	3.98318
KALIRO	42.8571	60.4839		9	74.9922	18.7578
KALUNGU	49.1071	58.871		10	59.4848	14.6223
KAMULI	67.8571	68.1452		11	51.7312	-17.8026
KANUNGU	86.6071	70.5645		12	49.8703	-7.90598
KAPELEBYONG	30.3571	62.0968		13	50.1804	-18.0376
KASESE	28.5714	43.9516		14	66.3081	5.12048
KATAKWI	78.5714	64.5161		15	76.2328	11.2672
KIBAALE	37.5	76.6129		16	49.5601	4.90416
KIKUUBE	29.4643	77.0161		17	66.6182	20.8818
KISORO	62.5	80.2419		18	47.6992	-10.1992
KOLE	42.8571	96.7742		19	70.9603	21.004
KUMI	70.5357	79.0323		20	45.2181	-19.3252
KWANIA	38.3929	75.8065		21	61.3457	-16.7029
KYOTERA	81.25	63.3065		22	70.34	15.3743
LAMWO	43.75	76.6129		23	57.624	-21.9097
LIRA	83.0357	72.5806		24	67.5487	20.8442
LUUKA	32.1429	64.5161		25	58.5544	21.8027
LWENGO	26.7857	52.8226		26	45.5282	-10.7068
LYANTONDE	64.2857	79.4355		27	49.8703	27.8083
MANAFWA	98.2143	86.6935		28	69.7197	18.6731
MASAKA CITY	29.4643	78.2258		29	54.2123	39.5377
MASINDI	76.7857	82.2581		30	70.0299	13.0058
MAYUGE	79.4643	55.2419		31	66.6182	9.27461
MBALE	88.3929	83.871		32	50.1804	32.8553
MOROTO	67.8571	60.8871		33	57.0037	-31.1108
MOYO	60.7143	73.7903		34	51.1109	-8.25372
MPIGI	56.25	65.7258		35	49.8703	-0.763126
NABILATUK	39.2857	69.3548		36	57.0037	10.8535
NAKAPIRIPIRIT	33.9286	80.2419		37	58.8646	27.7426
NAMAYINGO	31.25	70.5645		38	52.3515	-21.9943
NAMUTUMBA	37.5	66.129		39	38.3948	-9.82338
NEBBI	80.3571	83.871		40	54.2123	24.3591
NGORA	74.1071	64.9194		41	63.5168	-26.0168
NTOROKO	40.1786	87.9032		42	63.8269	-34.3626
OBONGI	34.8214	67.7419		43	66.3081	-3.80809
OTUKE	40.1786	78.629		44	79.0241	-36.167
OYAM	94.6429	87.0968		45	65.3777	5.15806
PAKWACH	33.0357	75.4032		46	62.8965	-24.5036
RAKAI	62.5	63.3065		47	53.2819	27.9681
RUBANDA	41.9643	72.1774		48	63.5168	-19.7668
RUKIGA	41.0714	70.5645		49	60.4153	22.6204
RUKUNGIRI	77.6786	65.3226		50	54.2123	-22.0695
SEMBABULE	57.1429	66.129		51	45.2181	-18.4323
SERERE	28.5714	62.0968		52	65.6878	-1.40208
SOROTI CITY	83.0357	74.1935		53	71.2705	26.9438
TEREGO	57.1429	50.8065		54	64.7574	-35.2931
YUMBE	72.3214	82.2581		55	67.8588	8.92688
				56	47.0789	32.3853
				57	69.0994	19.2934
				58	51.421	16.4361
				59	61.3457	-0.631446
				60	55.1428	1.10722
				61	57.9341	-18.6484
				62	66.3081	-32.3795
				63	58.8646	-27.6146
				64	55.4529	-17.9529
				65	69.0994	11.2577
				66	54.5225	19.5847
				67	72.2009	-32.0223
				68	56.6935	-21.8721
				69	65.0675	-24.8889
				70	71.5806	23.0623
				71	62.5863	-29.5506
				72	53.2819	9.21811
				73	60.1051	-18.1409
				74	58.8646	-17.7931
				75	54.8326	22.8459
				76	55.4529	1.68993
				77	52.3515	-23.78
				78	61.6559	21.3798
				79	43.6673	13.4755
				80	67.8588	4.4626
