# Supplementary material for: Validating Uganda's Subnational Health Systems Functionality Index for Universal Health Coverage Outcomes and Revealing Capacity Gaps in Access, Quality, Demand, and Resilience
Source: Research Square preprint supplement (doi:10.21203/rs.3.rs-5743811/v1), 2025-06-04
Supplement: Supplementary file 6 [file b7b2b977e3093627ba43da1b.xlsx]

## Sheet: Functionality Raw
Region	Acholi	Acholi	Acholi	Acholi	Acholi	Acholi	Acholi	Acholi	Acholi	Bugisu-Elgon	Bugisu-Elgon	Bugisu-Elgon	Bugisu-Elgon	Bugisu-Elgon	Bukedi	Bukedi	Bukedi	Bunyoro	Bunyoro	Bunyoro	Bunyoro	Bunyoro	Bunyoro	Bunyoro	Bunyoro	Busoga	Busoga	Busoga	Busoga	Busoga	Busoga	Busoga	Busoga	Busoga	Busoga	Busoga	Busoga	Busoga	Karamoja	Karamoja	Karamoja	Karamoja	Karamoja	Karamoja	Kigezi	Kigezi	Kigezi	Kigezi	Kigezi
SNU (District / City)	AGAGO	AMURU	GULU	GULU CITY	KITGUM	LAMWO	NWOYA	OMORO		BUDUDA	MANAFWA	MBALE	MBALE CITY		BUTALEJA	BUTEBO		BULIISA	HOIMA	HOIMA CITY	KAGADI	KIBAALE	KIKUUBE	MASINDI		BUGIRI	BUGWERI	BUYENDE	IGANGA	JINJA CITY	JINJA DISTRICT	KALIRO	KAMULI	LUUKA	MAYUGE	NAMAYINGO	NAMUTUMBA		ABIM	AMUDAT	MOROTO	NABILATUK	NAKAPIRIPIRIT		KABALE	KANUNGU	KISORO	RUBANDA	RUKIGA
Financial Access	81.25	62.5	100	100	100	100	100	93.75	92.1875	68.75	75	81.25	81.25	76.5625	87.5	75	81.25	93.75	93.75	100	68.75	62.5	100	81.25	85.7143	75	56.25	56.25	87.5	75	93.75	93.75	81.25	50	68.75	87.5	62.5	73.9583	68.75	68.75	93.75	100	75	81.25	100	75	68.75	43.75	56.25
(blank)	81.25	62.5	100	100	100	100	100	93.75	92.1875	68.75	75	81.25	81.25	76.5625	87.5	75	81.25	93.75	93.75	100	68.75	62.5	100	81.25	85.7143	75	56.25	56.25	87.5	75	93.75	93.75	81.25	50	68.75	87.5	62.5	73.9583	68.75	68.75	93.75	100	75	81.25	100	75	68.75	43.75	56.25
There are mechanisms to identify and support indigent users to access services	100	100	100	100	100	100	100	75	96.875	100	100	100	100	100	100	100	100	75	75	100	50	50	100	100	78.5714	100	50	75	75	75	75	75	100	75	50	100	75	77.0833	75	75	75	100	75	80	100	75	100	25	75
Users of services are not expected to pay access inpatient services	75	75	100	100	100	100	100	100	93.75	50	75	75	75	68.75	100	75	87.5	100	100	100	75	100	100	75	92.8571	100	75	75	100	75	100	100	100	50	75	75	75	83.3333	100	50	100	100	75	85	100	75	75	75	75
Users of services are not expected to pay access specialist clinics	75	0	100	100	100	100	100	100	84.375	50	50	75	75	62.5	75	50	62.5	100	100	100	75	0	100	75	78.5714	0	0	0	75	75	100	100	75	0	75	100	0	50	0	100	100	100	75	75	100	75	25	0	0
Users of services are not expected to pay to access outpatient services	75	75	100	100	100	100	100	100	93.75	75	75	75	75	75	75	75	75	100	100	100	75	100	100	75	92.8571	100	100	75	100	75	100	100	50	75	75	75	100	85.4167	100	50	100	100	75	85	100	75	75	75	75
Physical Access	76.5625	35.2941	23.4375	80.5556	70.8333	26.4706	82.8125	23.4375	52.4254	80.8824	81.9444	81.9444	77.9412	80.6781	82.8947	83.3333	83.114	73.6842	29.4118	88.1579	73.6111	30	26.3889	76.3158	56.7957	79.1667	30.2632	23.4375	78.9474	65.625	69.7368	44.4444	70.8333	16.6667	62.5	23.4375	40.2778	50.4447	85.2941	50	75	26.3889	23.6842	52.0734	73.6842	79.4118	66.0714	27.7778	30.5556
(blank)	76.5625	35.2941	23.4375	80.5556	70.8333	26.4706	82.8125	23.4375	52.4254	80.8824	81.9444	81.9444	77.9412	80.6781	82.8947	83.3333	83.114	73.6842	29.4118	88.1579	73.6111	30	26.3889	76.3158	56.7957	79.1667	30.2632	23.4375	78.9474	65.625	69.7368	44.4444	70.8333	16.6667	62.5	23.4375	40.2778	50.4447	85.2941	50	75	26.3889	23.6842	52.0734	73.6842	79.4118	66.0714	27.7778	30.5556
80% of health facilities are available in the sub national unit as per country norms (eg Within 5km of radius)	75	25	25	62.5	37.5	25	75	25	43.75	50	25	87.5	50	53.125	87.5	62.5	75	75	25	87.5	100	25	0	75	55.3571	100	37.5	25	75	75	62.5	50	62.5	25	50	25	0	48.9583	87.5	25	75	0	0	37.5	87.5	87.5	100	25	37.5
80% of health facilities are physically accessible all year round (eg No changes to access with changes in weather, transport, etc)	87.5	37.5	37.5	62.5	87.5	37.5	87.5	37.5	59.375	50	75	87.5	87.5	75	87.5	87.5	87.5	87.5	37.5	87.5	87.5	37.5	25	87.5	64.2857	75	37.5	25	87.5	50	87.5	37.5	62.5	25	50	25	37.5	50	87.5	50	87.5	37.5	25	57.5	75	87.5	100	25	37.5
Clinical staff (doctors, nurses, midwives) are available in at least 80% of facilities as per norms	75	87.5	0	87.5	75	25	87.5	25	57.8125	87.5	87.5	87.5	75	84.375	75	87.5	81.25	50	37.5	87.5	62.5	25	25	75	51.7857	75	25	0	75	50	62.5	87.5	62.5	0	62.5	25	25	45.8333	87.5	75	62.5	25	25	55	50	100	87.5	25	37.5
Clinical support staff (pharmacists, etc) are available in at least 80% of facilities as per norms	75	25	0	100	100	0	100	0	50	87.5	87.5	50	75	75	62.5	100	81.25	62.5	0	87.5	62.5	25	0	62.5	42.8571	100	0	0	100	50	62.5	62.5	62.5	0	50	25	25	44.7917	75	25	75	25	25	45	37.5	25	75	0	0
Health commodities (blood and blood products) are available in 80% of facilities	62.5	25	0	62.5	50	25	100	25	43.75	100	75	75	75	81.25	100	100	100	50	0	100	62.5	25	37.5	75	50	75	37.5	0	62.5	50	62.5	0	75	0	62.5	62.5	62.5	45.8333	75	50	100	25	25	55	25	75	75	0	25
Health commodities (tracer medicines) are available in 80% of facilities	100	0	25	87.5	25	0	25	0	32.8125	87.5	87.5	62.5	62.5	75	87.5	62.5	75	62.5	0	87.5	87.5	25	25	62.5	50	87.5	37.5	37.5	75	87.5	87.5	25	87.5	0	62.5	0	25	51.0417	87.5	62.5	75	25	25	55	87.5	62.5	37.5	25	25
Health commodities (vaccines ) are available in 80% of facilities	25	37.5	25	87.5	87.5	37.5	87.5	0	48.4375	87.5	87.5	87.5	87.5	87.5	87.5	87.5	87.5	87.5	37.5	87.5	87.5	37.5	37.5	87.5	66.0714	87.5	37.5	37.5	75	75	62.5	25	87.5	25	62.5	25	62.5	55.2083	87.5	25	87.5	37.5	25	52.5	87.5	87.5	62.5	37.5	37.5
Health equipment (blood pressure apparatus, stethoscope, adult and infant scale, thermometer) are available in 80% of facilities	87.5	37.5	37.5	87.5	87.5	37.5	75	0	56.25	87.5	87.5	87.5	87.5	87.5	87.5	87.5	87.5	87.5	37.5	87.5	87.5	37.5	37.5	75	64.2857	62.5	25	25	75	62.5	87.5	37.5	75	25	75	0	87.5	53.125	75	50	75	25	25	50	87.5	75	25	37.5	37.5
Management and administrative staff are available in at least 80% of facilities as per norms	75	0	0	100	62.5	0	100	37.5	46.875	87.5	87.5	87.5	87.5	87.5	87.5	87.5	87.5	75	37.5	87.5	50	25	25	75	53.5714	75	25	0	87.5	75	50	62.5	75	0	100	0	0	45.8333	100	50	87.5	0	25	52.5	87.5	100	25	37.5	0
Outreach and mobile services are conducted in the last 3 months for at least 80% of hard to reach areas	87.5	37.5	37.5	87.5	87.5	37.5	87.5	37.5	62.5	62.5	87.5	87.5	75	78.125	75	87.5	81.25	87.5	37.5	87.5	50	37.5	25	87.5	58.9286	75	25	37.5	87.5	75	62.5	37.5	62.5	25	62.5	0	37.5	48.9583	87.5	50	37.5	37.5	25	47.5	87.5	87.5	75	37.5	37.5
Socio-cultural Access	100	93.75	87.5	81.25	93.75	100	93.75	75	90.625	62.5	75	81.25	93.75	78.125	100	87.5	93.75	81.25	75	100	93.75	62.5	75	87.5	82.1429	50	68.75	62.5	100	75	62.5	68.75	62.5	56.25	68.75	68.75	81.25	68.75	93.75	56.25	56.25	87.5	68.75	72.5	87.5	62.5	87.5	62.5	81.25
(blank)	100	93.75	87.5	81.25	93.75	100	93.75	75	90.625	62.5	75	81.25	93.75	78.125	100	87.5	93.75	81.25	75	100	93.75	62.5	75	87.5	82.1429	50	68.75	62.5	100	75	62.5	68.75	62.5	56.25	68.75	68.75	81.25	68.75	93.75	56.25	56.25	87.5	68.75	72.5	87.5	62.5	87.5	62.5	81.25
Cultural practices that negatively impact women's and children's health are being addressed	100	100	100	75	100	100	100	75	93.75	0	0	100	100	50	100	100	100	75	75	100	100	75	75	75	82.1429	75	100	75	100	75	75	75	75	50	75	50	75	75	100	75	75	100	75	85	100	75	100	75	100
Literary and education initiatives for the boy child are being implemented	100	75	75	75	75	100	100	75	84.375	75	100	50	100	81.25	100	75	87.5	75	75	100	100	25	75	75	75	25	25	25	100	75	25	75	25	25	50	75	50	47.9167	100	25	50	100	50	65	50	25	75	25	75
Most of the young and adolescent girls are participating in formal schooling	100	100	75	75	100	100	75	75	87.5	100	100	100	100	100	100	100	100	75	75	100	100	75	75	100	85.7143	75	100	75	100	75	100	50	75	75	75	75	100	81.25	100	50	25	50	50	55	100	75	75	75	75
Social barriers to hindering women from accessing and using services are known and being addressed	100	100	100	100	100	100	100	75	96.875	75	100	75	75	81.25	100	75	87.5	100	75	100	75	75	75	100	85.7143	25	50	75	100	75	50	75	75	75	75	75	100	70.8333	75	75	75	100	100	85	100	75	100	75	75
Grand Total	81.25	49	46.875	83.6538	78.8462	50	87.5	43.75	65.1094	76	79.8077	81.7308	81	79.6346	86.1111	82.6923	84.4017	77.7778	47	91.6667	75.9615	39.2857	45.1923	78.7037	65.084	74.0385	39.8148	35.4167	83.3333	68.75	72.2222	55.7692	71.1538	29.3478	64.4231	41.6667	50	57.1613	84	55	75	47.1154	37.963	59.8157	79.6296	76	70.4545	35.5769	42.3077
																																												#DIV/0!
Health Seeking Behaviours	75	87.5	66.6667	79.1667	100	87.5	95.8333	100	86.4583	83.3333	75	95.8333	62.5	79.1667	95.8333	95.8333	95.8333	70.8333	66.6667	66.6667	70.8333	75	87.5	83.3333	74.4048	79.1667	79.1667	66.6667	75	45.8333	62.5	70.8333	66.6667	75	66.6667	66.6667	75	69.0972	91.6667	75	50	79.1667	91.6667	77.5	91.6667	41.6667	87.5	83.3333	100
(blank)	75	87.5	66.6667	79.1667	100	87.5	95.8333	100	86.4583	83.3333	75	95.8333	62.5	79.1667	95.8333	95.8333	95.8333	70.8333	66.6667	66.6667	70.8333	75	87.5	83.3333	74.4048	79.1667	79.1667	66.6667	75	45.8333	62.5	70.8333	66.6667	75	66.6667	66.6667	75	69.0972	91.6667	75	50	79.1667	91.6667	77.5	91.6667	41.6667	87.5	83.3333	100
Processes to monitor and encourage appropriate health seeking behavior are available for at least 80% of adolescent females	75	100	75	75	100	100	100	100	90.625	75	50	100	75	75	100	100	100	75	75	50	75	75	75	100	75	75	75	75	75	25	75	75	75	75	75	100	75	72.9167	100	75	50	75	100	80	100	25	75	75	100
Processes to monitor and encourage appropriate health seeking behavior are available for at least 80% of adolescent males	75	75	75	75	100	100	100	100	87.5	75	50	75	75	68.75	100	100	100	50	75	50	50	50	75	75	60.7143	75	75	50	50	25	50	75	75	100	50	0	75	58.3333	100	75	50	75	100	80	75	25	75	75	100
Processes to monitor and encourage appropriate health seeking behavior are available for at least 80% of adults	75	75	75	100	100	100	100	100	90.625	100	75	100	25	75	100	100	100	75	50	50	50	75	100	75	67.8571	100	75	75	75	25	75	75	50	75	75	75	75	70.8333	75	75	50	75	75	70	100	25	100	75	100
Processes to monitor and encourage appropriate health seeking behavior are available for at least 80% of elderly persons	25	75	25	75	100	25	100	100	65.625	50	75	100	25	62.5	75	75	75	50	50	50	50	50	75	75	57.1429	75	75	50	75	100	50	75	50	50	50	75	75	66.6667	75	75	50	50	75	65	75	25	75	75	100
Processes to monitor and encourage appropriate health seeking behavior are available for at least 80% of pregnant mothers and newborns	100	100	75	75	100	100	75	100	90.625	100	100	100	75	93.75	100	100	100	75	75	100	100	100	100	100	92.8571	75	100	75	75	50	75	50	75	75	75	75	75	72.9167	100	75	50	100	100	85	100	75	100	100	100
Processes to monitor and encourage appropriate health seeking behavior are available for at least 80% of under 5 year old children	100	100	75	75	100	100	100	100	93.75	100	100	100	100	100	100	100	100	100	75	100	100	100	100	75	92.8571	75	75	75	100	50	50	75	75	75	75	75	75	72.9167	100	75	50	100	100	85	100	75	100	100	100
Individual Health Action	79.1667	70.8333	66.6667	79.1667	100	87.5	75	95.8333	81.7708	91.6667	87.5	83.3333	70.8333	83.3333	91.6667	91.6667	91.6667	79.1667	66.6667	91.6667	87.5	75	83.3333	75	79.7619	83.3333	75	66.6667	83.3333	70.8333	75	66.6667	66.6667	66.6667	66.6667	79.1667	75	72.9167	91.6667	75	75	83.3333	70.8333	79.1667	100	70.8333	91.6667	75	87.5
(blank)	79.1667	70.8333	66.6667	79.1667	100	87.5	75	95.8333	81.7708	91.6667	87.5	83.3333	70.8333	83.3333	91.6667	91.6667	91.6667	79.1667	66.6667	91.6667	87.5	75	83.3333	75	79.7619	83.3333	75	66.6667	83.3333	70.8333	75	66.6667	66.6667	66.6667	66.6667	79.1667	75	72.9167	91.6667	75	75	83.3333	70.8333	79.1667	100	70.8333	91.6667	75	87.5
Programs for promoting health and wellbeing for individuals are available for at least 80% of adolescent females	100	75	75	75	100	100	75	100	87.5	100	75	75	75	81.25	100	100	100	75	75	100	75	75	75	75	78.5714	75	75	75	100	100	75	75	75	75	75	75	75	79.1667	100	75	75	75	75	80	100	100	75	75	75
Programs for promoting health and wellbeing for individuals are available for at least 80% of adolescent males	75	75	75	75	100	100	75	100	84.375	100	75	75	75	81.25	100	100	100	75	75	100	75	50	75	50	71.4286	75	75	50	100	25	75	75	75	50	50	75	50	64.5833	100	75	75	50	75	75	100	25	75	25	75
Programs for promoting health and wellbeing for individuals are available for at least 80% of adults	75	75	75	75	100	100	75	100	84.375	100	100	100	75	93.75	100	75	87.5	75	50	100	75	75	75	75	75	100	75	75	75	25	75	50	50	50	75	100	75	68.75	75	75	75	100	75	80	100	75	100	75	100
Programs for promoting health and wellbeing for individuals are available for at least 80% of elderly persons	25	25	25	75	100	25	75	100	56.25	50	75	75	50	62.5	50	75	62.5	50	50	50	100	50	75	75	64.2857	50	75	50	50	100	75	50	50	50	50	75	75	62.5	75	75	75	75	50	70	100	25	100	75	75
Programs for promoting health and wellbeing for individuals are available for at least 80% of pregnant mothers and newborns	100	100	75	100	100	100	75	100	93.75	100	100	75	75	87.5	100	100	100	100	75	100	100	100	100	100	96.4286	100	75	75	75	100	75	75	75	100	75	75	100	83.3333	100	75	75	100	75	85	100	100	100	100	100
Programs for promoting health and wellbeing for individuals are available for at least 80% of under 5 year old children	100	75	75	75	100	100	75	75	84.375	100	100	100	75	93.75	100	100	100	100	75	100	100	100	100	75	92.8571	100	75	75	100	75	75	75	75	75	75	75	75	79.1667	100	75	75	100	75	85	100	100	100	100	100
Grand Total	77.0833	79.1667	66.6667	79.1667	100	87.5	85.4167	97.9167	84.1146	87.5	81.25	89.5833	66.6667	81.25	93.75	93.75	93.75	75	66.6667	79.1667	79.1667	75	85.4167	79.1667	77.0833	81.25	77.0833	66.6667	79.1667	58.3333	68.75	68.75	66.6667	70.8333	66.6667	72.9167	75	71.0069	91.6667	75	62.5	81.25	81.25	78.3333	95.8333	56.25	89.5833	79.1667	93.75
									#DIV/0!					#DIV/0!			#DIV/0!								#DIV/0!													#DIV/0!						#DIV/0!
Effectiveness of Care	85	80	80	85	95	95	70	30	77.5	80	85	90	65	80	95	85	90	85	35	80	85	35	35	85	62.8571	75	35	85	75	85	75	60	60	30	60	70	90	66.6667	65	25	100	60	25	55	90	75	70	40	40
At least 80% of clinical staff have received continuing professional development focusing on their area of work in the past 1 year	75	100	100	75	100	100	100	25	84.375	100	100	100	75	93.75	100	100	100	100	75	100	100	75	75	75	85.7143	75	50	100	75	75	75	100	50	75	75	25	75	70.8333	50	25	100	100	50	65	100	75	25	100	75
At least 80% of hospitals have a functional therapeutics committee	75	75	75	75	75	75	50	25	65.625	75	75	50	25	56.25	100	25	62.5	50	0	50	100	0	0	75	39.2857	75	0	75	75	100	75	25	75	0	50	75	100	60.4167	50	25	100	0	0	35	100	100	25	0	25
At least 80% of hospitals have clinical governance committees / forums involving patient groups to ensure excellent clinical care	100	100	75	100	100	100	25	0	75	50	75	100	75	75	100	100	100	100	0	75	50	0	0	100	46.4286	75	50	100	75	75	75	50	50	0	50	100	75	64.5833	75	25	100	0	0	40	75	25	100	0	0
At least 80% of hospitals have results of clinical audits they have conducted in the past 1 year	100	25	75	75	100	100	75	0	68.75	75	75	100	75	81.25	75	100	87.5	75	0	75	75	0	0	75	42.8571	75	0	75	75	100	75	50	50	0	50	75	100	60.4167	50	25	100	100	0	55	75	100	100	0	0
Standard management guidelines are used across at least 80% of facilities	75	100	75	100	100	100	100	100	93.75	100	100	100	75	93.75	100	100	100	100	100	100	100	100	100	100	100	75	75	75	75	75	75	75	75	75	75	75	100	77.0833	100	25	100	100	75	80	100	75	100	100	100
User Experiences	100	95.8333	75	91.6667	95.8333	100	66.6667	83.3333	88.5417	91.6667	91.6667	87.5	70.8333	85.4167	95.8333	79.1667	87.5	79.1667	70.8333	87.5	75	75	75	70.8333	76.1905	66.6667	66.6667	66.6667	91.6667	83.3333	83.3333	58.3333	66.6667	70.8333	75	54.1667	87.5	72.5694	70.8333	50	62.5	91.6667	95.8333	74.1667	95.8333	70.8333	83.3333	79.1667	91.6667
An independent process exists to review and follow up feedback on user experiences exists in at least 80% of facilities	100	75	75	75	75	100	75	25	75	100	75	75	50	75	100	75	87.5	75	50	100	100	50	75	50	71.4286	25	25	75	100	75	75	50	50	50	50	25	75	56.25	100	25	75	100	100	80	75	25	100	75	100
Mechanisms to ensure confidentiality of users is assured as they receive care exist in at least 80% of facilities	100	100	75	100	100	100	75	75	90.625	100	100	75	75	87.5	100	75	87.5	100	100	100	100	100	100	100	100	75	75	75	100	100	100	75	100	50	75	100	100	85.4167	50	75	75	100	100	80	100	100	100	100	100
Mechanisms to ensure users are treated with dignity as they receive care exist in at least 80% of facilities	100	100	75	75	100	100	100	100	93.75	100	100	75	100	93.75	100	50	75	100	75	100	75	100	75	75	85.7143	100	75	75	100	75	75	75	50	75	75	25	100	75	75	75	75	100	100	85	100	75	100	75	100
Mechanisms to ensure users have access to social support during care exist in at least 80% of facilities	100	100	75	100	100	100	25	100	87.5	75	75	100	75	81.25	100	100	100	75	50	75	50	75	75	75	67.8571	100	75	75	75	100	100	25	75	100	100	100	75	83.3333	100	25	50	100	75	70	100	75	75	75	75
Mechanisms to ensure users have choice of providers for their care exist	100	100	75	100	100	100	25	100	87.5	75	100	100	50	81.25	75	75	75	50	75	50	50	50	50	50	53.5714	50	75	50	100	75	75	50	50	75	75	50	75	66.6667	25	25	50	50	100	50	100	75	25	75	75
Mechanisms to ensure users receive prompt attention when they seek care exist in at least 80% of facilities	100	100	75	100	100	100	100	100	96.875	100	100	100	75	93.75	100	100	100	75	75	100	75	75	75	75	78.5714	50	75	50	75	75	75	75	75	75	75	25	100	68.75	75	75	50	100	100	80	100	75	100	75	100
User Safety	95	70	75	95	100	70	75	85	83.125	85	75	85	55	75	100	80	90	70	60	65	55	60	75	65	64.2857	90	45	60	75	70	55	40	50	60	55	70	70	61.6667	80	45	70	90	90	75	90	55	55	75	75
At least 80% of health facilities are monitoring the 8 common causes of poor safety: (1) medical errors, (2) health care associated infections, (3) unsafe surgical procedures, (4) unsafe injections, (5) diagnostic errors, (6)unsafe transfusions, (7) sepsis and (8) blood clots	100	75	75	75	100	75	75	50	78.125	75	75	100	75	81.25	100	75	87.5	75	50	50	25	50	75	75	57.1429	75	25	50	75	75	50	25	25	50	25	75	75	52.0833	100	25	75	75	100	75	100	75	50	75	75
Health facilities have in place vigilance and awareness initiatives involving users, to eliminate harm to users	100	100	75	100	100	75	75	100	90.625	100	75	100	25	75	100	100	100	75	75	75	75	75	75	75	75	100	25	75	75	75	50	50	50	50	75	75	100	66.6667	100	25	75	100	75	75	100	75	75	75	75
Mechanisms to identify, and respond to adverse events following care provision is functional in at least 80% of facilities	100	75	75	100	100	75	100	100	90.625	75	75	100	75	81.25	100	100	100	75	75	75	75	75	100	75	78.5714	100	75	100	75	100	75	50	75	50	75	75	75	77.0833	100	75	75	100	75	85	100	75	100	75	100
Processes to prevent, monitor and act on medical errors is in place in at least 80% of facilities	100	75	75	100	100	100	100	75	90.625	100	100	100	50	87.5	100	100	100	75	75	75	75	75	75	50	71.4286	100	75	50	75	75	75	50	75	75	75	50	75	70.8333	100	75	50	75	100	80	75	25	25	75	100
Surveys of patient safety are conducted at least once every 2 years in up to 80% of facilities	75	25	75	100	100	25	25	100	65.625	75	50	25	50	50	100	25	62.5	50	25	50	25	25	50	50	39.2857	75	25	25	75	25	25	25	25	75	25	75	25	41.6667	0	25	75	100	100	60	75	25	25	75	25
Grand Total	93.75	82.8125	76.5625	90.625	96.875	89.0625	70.3125	67.1875	83.3984	85.9375	84.375	87.5	64.0625	80.4688	96.875	81.25	89.0625	78.125	56.25	78.125	71.875	57.8125	62.5	73.4375	68.3036	76.5625	50	70.3125	81.25	79.6875	71.875	53.125	59.375	54.6875	64.0625	64.0625	82.8125	67.3177	71.875	40.625	76.5625	81.25	71.875	68.4375	92.1875	67.1875	70.3125	65.625	70.3125
									#DIV/0!					#DIV/0!			#DIV/0!								#DIV/0!													#DIV/0!						#DIV/0!
Inherent Resilience	74.2647	87.5	77.2059	82.3529	90.4412	79.4118	88.9706	66.9118	80.8824	91.9118	88.9706	85.2941	69.8529	84.0074	91.9118	80.8824	86.3971	81.6176	72.7941	78.6765	82.3529	79.4118	80.1471	85.2941	80.042	78.6765	64.7059	65.4412	69.1176	44.1176	69.1176	64.7059	65.4412	70.5882	61.0294	80.1471	72.0588	67.0956	86.7647	49.2647	63.9706	70.5882	80.1471	70.1471	89.7059	68.3824	78.6765	77.2059	69.8529
Awareness of the system	80	85	80	80	70	80	85	65	78.125	100	90	85	65	85	95	65	80	80	65	80	75	80	75	75	75.7143	75	65	65	65	25	50	65	60	70	50	75	55	60	85	45	60	75	70	67	75	70	80	75	80
Simulation exercises have been conducted in the past 1 year, assessing capacity to respond to potential shock events of highest risk of occurrence	75	100	50	75	25	75	100	25	65.625	100	100	75	50	81.25	100	50	75	50	50	100	50	50	50	50	57.1429	25	50	25	50	25	25	75	75	50	75	50	25	45.8333	75	25	50	25	50	45	25	25	25	25	25
There are agreed standard operating procedures for ensuring functional staff, supplies and infrastructure in the event of a shock event	75	75	75	100	100	100	100	100	90.625	100	100	75	50	81.25	100	75	87.5	75	75	50	50	75	75	100	71.4286	100	75	75	75	25	50	50	75	50	50	100	25	62.5	100	50	50	50	75	65	100	75	100	75	100
There is a functional surveillance network reporting both weekly on notifiable diseases, and monthly on health system capacity changes	100	75	100	75	100	100	100	100	93.75	100	100	100	100	100	100	100	100	100	100	100	100	100	100	100	100	100	75	75	75	25	75	75	50	100	75	75	75	72.9167	100	100	100	100	75	95	100	100	100	100	100
There is documented up to date (under 1 year old) mapping of potential shocks â€“ covering acute and chronic disease, environmental, economic, and political shocks	75	100	75	75	25	25	100	25	62.5	100	75	75	50	75	75	25	50	75	50	50	75	75	50	50	60.7143	50	50	75	75	25	50	50	50	75	25	75	75	56.25	50	25	50	100	75	60	75	75	75	75	75
There is documented up to date (under 1 year old) mapping of the health system assets â€“ specifically staff, infrastructure, commodities	75	75	100	75	100	100	25	75	78.125	100	75	100	75	87.5	100	75	87.5	100	50	100	100	100	100	75	89.2857	100	75	75	50	25	50	75	50	75	25	75	75	62.5	100	25	50	100	75	70	75	75	100	100	100
Diversity in Provision of Services	68.3333	83.3333	75	88.3333	93.3333	80	81.6667	61.6667	78.9583	81.6667	83.3333	80	66.6667	77.9167	86.6667	76.6667	81.6667	81.6667	70	86.6667	83.3333	76.6667	76.6667	80	79.2857	76.6667	55	68.3333	65	26.6667	73.3333	66.6667	63.3333	73.3333	68.3333	85	76.6667	66.5278	83.3333	61.6667	71.6667	71.6667	85	74.6667	96.6667	80	75	75	70
Health facilities are aware of the range of essential services they are expected to provide, and have plans to expand their capacity to provide these	75	100	100	75	100	100	100	100	93.75	100	100	100	75	93.75	100	100	100	100	100	100	100	100	75	100	96.4286	100	50	75	75	25	100	100	50	75	75	75	75	72.9167	100	75	100	100	75	90	100	100	100	100	100
Health facilities are utilizing multiple service delivery approaches: fixed sites, outreaches, mobile clinics, e-referrals, etc to take services to their population	75	100	100	75	100	100	100	100	93.75	75	75	100	100	87.5	100	100	100	75	75	100	75	75	100	75	82.1429	75	50	75	0	25	75	100	75	75	75	100	75	66.6667	100	100	100	100	75	95	100	100	75	100	75
Health facilities have functional therapeutics committees that are monitoring rare / uncommon events impacting service provision	75	75	75	100	50	50	75	25	65.625	75	75	75	75	75	50	50	50	75	50	75	100	50	75	50	67.8571	75	50	50	75	25	50	25	75	50	50	75	50	54.1667	75	50	50	25	100	60	100	75	25	50	25
Health facilities have micro-plans, to take essential services to hard to reach populations in their areas of responsibility	100	100	75	100	100	100	100	75	93.75	100	100	100	75	93.75	100	100	100	75	75	100	75	75	50	75	75	100	75	75	75	25	50	75	50	100	75	100	75	72.9167	100	75	100	100	75	90	100	100	100	100	75
Health facility staff have the required decision, authority and protocols to initiate action and spend funds in event of shock events	75	75	75	75	100	100	100	100	87.5	25	75	25	25	37.5	50	25	37.5	75	75	100	100	100	100	100	92.8571	25	50	75	75	50	75	75	75	75	75	75	75	66.6667	75	50	25	25	100	55	75	75	100	75	75
Mechanisms exist for coordinating additional capacities (staff, infrastructure, medical supplies) mobilized to respond to threats	75	75	75	75	100	100	100	25	78.125	100	100	75	75	87.5	75	75	75	75	75	100	100	75	100	100	89.2857	100	75	75	75	25	50	75	75	75	75	75	75	70.8333	75	75	50	100	100	80	100	75	100	75	75
The primary care (front line) facilities have the needed epidemiology and other technical skills to identify and isolate health threats	25	100	75	100	100	100	25	100	78.125	100	75	100	75	87.5	75	100	87.5	100	75	75	75	75	75	100	82.1429	75	25	50	75	25	75	50	75	75	75	75	100	64.5833	75	25	50	75	100	65	75	75	75	75	50
There are no stock outs in the past 1 year for common supportive drugs and supplies used in emergency (Oxygen, analgesics, PPEs, and other supportive supplies)	25	25	25	100	100	25	25	25	43.75	50	50	25	25	37.5	100	25	62.5	75	25	50	50	75	50	50	53.5714	50	50	75	75	25	100	25	50	50	50	100	100	62.5	75	25	75	25	75	55	100	25	25	25	75
There are standard operating procedures to allow health facility staff to repurpose their infrastructure, staff and medical supplies when facing potential threats	75	100	75	100	100	75	100	25	81.25	100	100	100	75	93.75	100	100	100	100	100	100	75	75	100	100	92.8571	75	50	50	75	25	75	75	75	75	75	75	75	66.6667	50	50	50	100	75	65	100	75	100	75	75
There exist processes to guide facilities on how to identify and shield staff, infrastructure and medical supplies for continuing essential services provision during threats	75	100	75	75	100	75	100	25	78.125	100	100	100	50	87.5	100	100	100	75	75	75	100	75	75	100	82.1429	75	75	75	75	25	75	75	50	100	75	75	75	70.8333	75	75	50	75	100	75	100	100	100	75	75
Mobilization and deployment capacity	75	85	75	80	85	70	95	70	79.375	100	85	95	75	88.75	100	95	97.5	85	90	85	85	100	75	90	87.1429	90	80	75	75	70	65	75	70	70	60	80	70	73.3333	90	40	70	65	85	70	90	60	90	85	80
Public, and private sources of additional capacities (staff, infrastructure, medical supplies) for surge capacity are known and procedures to bring these on board are available	75	75	75	75	75	75	75	25	68.75	100	75	100	75	87.5	100	100	100	75	75	50	75	100	50	75	71.4286	75	75	75	75	50	50	75	75	75	75	75	50	68.75	50	25	50	75	75	55	75	50	75	75	25
There are functional mechanisms for communication and engagement with community groups in the area of responsibility of public facilities	75	100	75	100	100	75	100	100	90.625	100	100	75	75	87.5	100	100	100	75	100	100	100	100	100	100	96.4286	100	100	75	75	75	75	75	75	50	50	100	75	77.0833	100	75	75	100	100	90	100	75	75	100	100
There are functional mechanisms for communication and engagement with non-public health providers working in the area of responsibility of public facilities â€“ such as private sector, NGOs, CSOs, and others	75	100	75	75	75	75	100	100	84.375	100	100	100	100	100	100	100	100	75	75	75	100	100	75	100	85.7143	100	75	75	75	75	75	75	75	75	75	75	75	77.0833	100	50	75	25	100	70	100	100	100	100	100
There are functional mechanisms for communication and engagement with other health related sectors in the area of responsibility of public facilities â€“ such as agriculture, water, security, etc	75	75	75	75	100	50	100	100	81.25	100	75	100	75	87.5	100	100	100	100	100	100	75	100	75	100	92.8571	100	75	75	75	75	75	75	75	75	50	75	75	75	100	25	100	100	75	80	100	50	100	75	100
There are pre-agreed mechanisms for sharing of personnel, funds and capacities amongst stakeholders working within their areas of responsibility of facilities	75	75	75	75	75	75	100	25	71.875	100	75	100	50	81.25	100	75	87.5	100	100	100	75	100	75	75	89.2857	75	75	75	75	75	50	75	50	75	50	75	75	68.75	100	25	50	25	75	55	75	25	100	75	75
Transformation Capacity	80.5556	97.2222	80.5556	75	100	83.3333	100	75	86.4583	100	100	88.8889	75	90.9722	94.4444	88.8889	91.6667	80.5556	72.2222	61.1111	83.3333	72.2222	91.6667	97.2222	79.7619	77.7778	72.2222	55.5556	75	69.4444	75	55.5556	69.4444	66.6667	55.5556	75	75	68.5185	91.6667	36.1111	50	69.4444	75	64.4444	86.1111	52.7778	77.7778	77.7778	58.3333
Process documentation and intelligence generation is planned for shock events, and a repository of such lessons exists	75	75	75	75	100	50	100	25	71.875	100	100	50	75	81.25	50	50	50	75	50	50	50	50	75	75	60.7143	100	100	50	75	75	75	50	75	50	50	75	75	70.8333	25	25	50	25	75	40	75	25	50	50	25
There are agreed protocols to guide absorption of resources and skills mobilized during a response to an event into the routine system	75	100	75	75	100	75	100	100	87.5	100	100	100	75	93.75	100	100	100	75	100	50	100	75	75	100	82.1429	100	75	50	75	50	75	50	75	75	50	50	75	66.6667	100	50	50	100	75	75	100	75	75	75	25
There are protocols to constantly monitor essential service provision during a shock event exist	75	100	75	75	100	75	100	100	87.5	100	100	100	100	100	100	100	100	75	75	75	100	75	100	100	85.7143	100	100	50	75	75	75	50	75	75	75	75	75	75	100	50	50	75	75	70	100	25	75	75	100
There is guidance on comprehensive recovery planning based on assessment, and investment across the health system	100	100	100	75	100	100	100	25	87.5	100	100	75	50	81.25	100	75	87.5	75	50	50	75	50	100	100	71.4286	75	25	50	75	75	75	50	75	75	50	100	75	66.6667	100	25	50	25	75	55	50	50	75	75	25
There is regularly updated information on the level of functionality of the health system	75	100	75	75	100	100	100	100	90.625	100	100	100	75	93.75	100	100	100	100	75	75	75	100	100	100	89.2857	25	75	75	75	75	75	75	50	50	50	75	75	64.5833	100	25	50	100	75	70	100	75	100	100	100
Targeted Resilience	82.1429	82.1429	69.6429	89.2857	100	73.2143	87.5	89.2857	84.1518	91.0714	83.9286	82.1429	83.9286	85.2679	94.6429	80.3571	87.5	78.5714	64.2857	85.7143	78.5714	73.2143	73.2143	78.5714	76.0204	62.5	57.1429	44.6429	71.4286	64.2857	46.4286	55.3571	71.4286	57.1429	48.2143	58.9286	58.9286	58.0357	71.4286	39.2857	57.1429	67.8571	80.3571	63.2143	78.5714	73.2143	82.1429	66.0714	71.4286
There exists adequate capacity for coordination and communication in response to potential threats	75	87.5	62.5	93.75	100	56.25	100	81.25	82.0312	87.5	87.5	62.5	87.5	81.25	93.75	62.5	78.125	75	50	87.5	81.25	56.25	68.75	62.5	68.75	43.75	56.25	37.5	62.5	43.75	56.25	56.25	87.5	50	37.5	68.75	56.25	54.6875	50	31.25	62.5	68.75	81.25	58.75	81.25	75	75	62.5	75
Established Emergency operations coordination centre	75	100	50	100	100	25	100	100	81.25	100	75	75	100	87.5	100	75	87.5	75	50	100	75	50	75	75	71.4286	25	25	25	75	25	25	50	75	25	25	75	50	41.6667	25	25	50	75	75	50	75	100	100	75	100
Monitor, Manage and Report Radiation emergencies	25	50	50	75	100	25	100	25	56.25	50	100	0	50	50	75	0	37.5	75	25	50	50	25	50	25	42.8571	0	50	25	50	25	25	25	100	0	25	75	50	37.5	0	25	25	0	75	25	50	25	25	25	0
Requisite skilled workforce to monitor and detect health risk	100	100	75	100	100	100	100	100	96.875	100	100	75	100	93.75	100	75	87.5	75	50	100	100	75	75	75	78.5714	50	75	50	75	100	100	75	75	100	75	50	75	75	100	50	75	100	75	80	100	75	75	75	100
Risk communication	100	100	75	100	100	75	100	100	93.75	100	75	100	100	93.75	100	100	100	75	75	100	100	75	75	75	82.1429	100	75	50	50	25	75	75	100	75	25	75	50	64.5833	75	25	100	100	100	80	100	100	100	75	100
There exists appropriate capacity for laboratory systems to detect health risk	87.5	87.5	81.25	87.5	100	81.25	87.5	100	89.0625	93.75	93.75	87.5	93.75	92.1875	93.75	75	84.375	81.25	75	100	81.25	81.25	81.25	93.75	84.8214	81.25	50	56.25	75	68.75	56.25	68.75	68.75	75	62.5	62.5	68.75	66.1458	75	43.75	62.5	81.25	81.25	68.75	81.25	81.25	87.5	75	68.75
Linking public health with law and multisectoral rapid response	75	75	75	75	100	75	75	100	81.25	100	100	100	100	100	100	75	87.5	75	75	100	75	75	75	100	82.1429	75	25	50	75	75	50	50	75	75	75	75	50	62.5	75	25	50	75	75	60	75	75	100	75	100
Medical countermeasures and personnel deployment	75	75	75	75	100	100	75	100	84.375	100	100	100	100	100	100	100	100	75	75	100	75	75	75	100	82.1429	75	50	25	75	25	75	75	75	75	50	50	100	62.5	75	25	50	50	75	55	75	100	75	75	25
Real-time surveillance of infectious diseases or health hazards	100	100	75	100	100	100	100	100	96.875	100	100	100	100	100	100	75	87.5	75	75	100	75	75	100	75	82.1429	100	75	100	75	100	25	75	75	100	75	75	75	79.1667	75	50	75	100	100	80	75	75	100	75	75
Safety and standards	100	100	100	100	100	50	100	100	93.75	75	75	50	75	68.75	75	50	62.5	100	75	100	100	100	75	100	92.8571	75	50	50	75	75	75	75	50	50	50	50	50	60.4167	75	75	75	100	75	80	100	75	75	75	75
There exists appropriate capacity for Leadership and governance for targeted shock events	75	83.3333	58.3333	91.6667	100	75	66.6667	75	78.125	91.6667	75	83.3333	75	81.25	91.6667	91.6667	91.6667	75	58.3333	66.6667	75	75	66.6667	66.6667	69.0476	50	66.6667	41.6667	75	66.6667	41.6667	33.3333	50	58.3333	33.3333	58.3333	50	52.0833	66.6667	41.6667	50	50	83.3333	58.3333	58.3333	75	83.3333	50	58.3333
Enforcement of Food safety regulations	75	75	75	100	100	100	100	100	90.625	100	75	75	50	75	75	75	75	75	50	75	75	75	100	75	75	25	100	25	75	75	25	25	25	50	25	25	50	43.75	25	25	50	25	75	40	75	75	100	75	100
IHR coordination, communication and advocacy	75	100	75	100	100	100	75	100	90.625	100	75	100	100	93.75	100	100	100	75	75	50	75	75	75	75	71.4286	50	50	75	75	75	75	50	75	75	50	75	50	64.5833	100	75	50	100	75	80	75	75	75	75	75
Monitoring and reporting Antimicrobial resistance (AMR)	75	75	25	75	100	25	25	25	53.125	75	75	75	75	75	100	100	100	75	50	75	75	75	25	50	60.7143	75	50	25	75	50	25	25	50	50	25	75	50	47.9167	75	25	50	25	100	55	25	75	75	0	0
There exists appropriate capacity for monitoring level of preparedness	91.6667	66.6667	75	83.3333	100	83.3333	91.6667	100	86.4583	91.6667	75	100	75	85.4167	100	100	100	83.3333	75	83.3333	75	83.3333	75	91.6667	80.9524	75	58.3333	41.6667	75	83.3333	25	58.3333	75	41.6667	58.3333	41.6667	58.3333	57.6389	100	41.6667	50	66.6667	75	66.6667	91.6667	58.3333	83.3333	75	83.3333
Detection and control of Zoonotic disease	100	75	50	75	100	100	100	100	87.5	100	75	100	75	87.5	100	100	100	100	75	100	75	75	75	100	85.7143	75	50	50	75	75	25	50	75	75	50	50	50	58.3333	100	25	50	100	75	70	75	75	75	75	100
Effecting Biosafety and biosecurity regulations	75	75	100	100	100	50	75	100	84.375	75	75	100	50	75	100	100	100	75	75	75	75	75	75	75	75	75	50	25	75	100	25	50	75	50	75	50	75	60.4167	100	50	50	100	75	75	100	25	75	75	75
Monitoring and enforcing Immunization according to IHR including cross border regulations (PoE)	100	50	75	75	100	100	100	100	87.5	100	75	100	100	93.75	100	100	100	75	75	75	75	100	75	100	82.1429	75	75	50	75	75	25	75	75	0	50	25	50	54.1667	100	50	50	0	75	55	100	75	100	75	75
Grand Total	77.8226	85.0806	73.7903	85.4839	94.7581	76.6129	88.3065	77.0161	82.3589	91.5323	86.6935	83.871	76.2097	84.5766	93.1452	80.6452	86.8952	80.2419	68.9516	81.8548	80.6452	76.6129	77.0161	82.2581	78.2258	71.371	61.2903	56.0484	70.1613	53.2258	58.871	60.4839	68.1452	64.5161	55.2419	70.5645	66.129	63.004	79.8387	44.7581	60.8871	69.3548	80.2419	67.0161	84.6774	70.5645	80.2419	72.1774	70.5645
[truncated: 50 more columns]

## Sheet:  Raw Interventions Func-Outcome
Region	Row Labels	Inherent Resilience	Awareness of the system	Simulation exercises have been conducted in the past 1 year, assessing capacity to respond to potential shock events of highest risk of occurrence	There are agreed standard operating procedures for ensuring functional staff, supplies and infrastructure in the event of a shock event	There is a functional surveillance network reporting both weekly on notifiable diseases, and monthly on health system capacity changes	There is documented up to date (under 1 year old) mapping of potential shocks â€“ covering acute and chronic disease, environmental, economic, and political shocks	There is documented up to date (under 1 year old) mapping of the health system assets â€“ specifically staff, infrastructure, commodities	Diversity in Provision of Services	Health facilities are aware of the range of essential services they are expected to provide, and have plans to expand their capacity to provide these	Health facilities are utilizing multiple service delivery approaches: fixed sites, outreaches, mobile clinics, e-referrals, etc to take services to their population	Health facilities have functional therapeutics committees that are monitoring rare / uncommon events impacting service provision	Health facilities have micro-plans, to take essential services to hard to reach populations in their areas of responsibility	Health facility staff have the required decision, authority and protocols to initiate action and spend funds in event of shock events	Mechanisms exist for coordinating additional capacities (staff, infrastructure, medical supplies) mobilized to respond to threats	The primary care (front line) facilities have the needed epidemiology and other technical skills to identify and isolate health threats	There are no stock outs in the past 1 year for common supportive drugs and supplies used in emergency (Oxygen, analgesics, PPEs, and other supportive supplies)	There are standard operating procedures to allow health facility staff to repurpose their infrastructure, staff and medical supplies when facing potential threats	There exist processes to guide facilities on how to identify and shield staff, infrastructure and medical supplies for continuing essential services provision during threats	Mobilization and deployment capacity	Public, and private sources of additional capacities (staff, infrastructure, medical supplies) for surge capacity are known and procedures to bring these on board are available	There are functional mechanisms for communication and engagement with community groups in the area of responsibility of public facilities	There are functional mechanisms for communication and engagement with non-public health providers working in the area of responsibility of public facilities â€“ such as private sector, NGOs, CSOs, and others	There are functional mechanisms for communication and engagement with other health related sectors in the area of responsibility of public facilities â€“ such as agriculture, water, security, etc	There are pre-agreed mechanisms for sharing of personnel, funds and capacities amongst stakeholders working within their areas of responsibility of facilities	Transformation Capacity	Process documentation and intelligence generation is planned for shock events, and a repository of such lessons exists	There are agreed protocols to guide absorption of resources and skills mobilized during a response to an event into the routine system	There are protocols to constantly monitor essential service provision during a shock event exist	There is guidance on comprehensive recovery planning based on assessment, and investment across the health system	There is regularly updated information on the level of functionality of the health system	Targeted Resilience	There exists adequate capacity for coordination and communication in response to potential threats	Established Emergency operations coordination centre	Monitor, Manage and Report Radiation emergencies	Requisite skilled workforce to monitor and detect health risk	Risk communication	There exists appropriate capacity for laboratory systems to detect health risk	Linking public health with law and multisectoral rapid response	Medical countermeasures and personnel deployment	Real-time surveillance of infectious diseases or health hazards	Safety and standards	There exists appropriate capacity for Leadership and governance for targeted shock events	Enforcement of Food safety regulations	IHR coordination, communication and advocacy	Monitoring and reporting Antimicrobial resistance (AMR)	There exists appropriate capacity for monitoring level of preparedness	Detection and control of Zoonotic disease	Effecting Biosafety and biosecurity regulations
Acholi	AGAGO	74.2647	80	75	75	100	75	75	68.3333	75	75	75	100	75	75	25	25	75	75	75	75	75	75	75	75	80.5556	75	75	75	100	75	82.1429	75	75	25	100	100	87.5	75	75	100	100	75	75	75	75	91.6667	100	75
Acholi	AMURU	87.5	85	100	75	75	100	75	83.3333	100	100	75	100	75	75	100	25	100	100	85	75	100	100	75	75	97.2222	75	100	100	100	100	82.1429	87.5	100	50	100	100	87.5	75	75	100	100	83.3333	75	100	75	66.6667	75	75
Acholi	GULU	77.2059	80	50	75	100	75	100	75	100	100	75	75	75	75	75	25	75	75	75	75	75	75	75	75	80.5556	75	75	75	100	75	69.6429	62.5	50	50	75	75	81.25	75	75	75	100	58.3333	75	75	25	75	50	100
Acholi	GULU CITY	82.3529	80	75	100	75	75	75	88.3333	75	75	100	100	75	75	100	100	100	75	80	75	100	75	75	75	75	75	75	75	75	75	89.2857	93.75	100	75	100	100	87.5	75	75	100	100	91.6667	100	100	75	83.3333	75	100
Acholi	KITGUM	90.4412	70	25	100	100	25	100	93.3333	100	100	50	100	100	100	100	100	100	100	85	75	100	75	100	75	100	100	100	100	100	100	100	100	100	100	100	100	100	100	100	100	100	100	100	100	100	100	100	100
Acholi	LAMWO	79.4118	80	75	100	100	25	100	80	100	100	50	100	100	100	100	25	75	75	70	75	75	75	50	75	83.3333	50	75	75	100	100	73.2143	56.25	25	25	100	75	81.25	75	100	100	50	75	100	100	25	83.3333	100	50
Acholi	NWOYA	88.9706	85	100	100	100	100	25	81.6667	100	100	75	100	100	100	25	25	100	100	95	75	100	100	100	100	100	100	100	100	100	100	87.5	100	100	100	100	100	87.5	75	75	100	100	66.6667	100	75	25	91.6667	100	75
Acholi	OMORO	66.9118	65	25	100	100	25	75	61.6667	100	100	25	75	100	25	100	25	25	25	70	25	100	100	100	25	75	25	100	100	25	100	89.2857	81.25	100	25	100	100	100	100	100	100	100	75	100	100	25	100	100	100
Bugisu-Elgon	BUDUDA	91.9118	100	100	100	100	100	100	81.6667	100	75	75	100	25	100	100	50	100	100	100	100	100	100	100	100	100	100	100	100	100	100	91.0714	87.5	100	50	100	100	93.75	100	100	100	75	91.6667	100	100	75	91.6667	100	75
Bugisu-Elgon	MANAFWA	88.9706	90	100	100	100	75	75	83.3333	100	75	75	100	75	100	75	50	100	100	85	75	100	100	75	75	100	100	100	100	100	100	83.9286	87.5	75	100	100	75	93.75	100	100	100	75	75	75	75	75	75	75	75
Bugisu-Elgon	MBALE	85.2941	85	75	75	100	75	100	80	100	100	75	100	25	75	100	25	100	100	95	100	75	100	100	100	88.8889	50	100	100	75	100	82.1429	62.5	75	0	75	100	87.5	100	100	100	50	83.3333	75	100	75	100	100	100
Bugisu-Elgon	MBALE CITY	69.8529	65	50	50	100	50	75	66.6667	75	100	75	75	25	75	75	25	75	50	75	75	75	100	75	50	75	75	75	100	50	75	83.9286	87.5	100	50	100	100	93.75	100	100	100	75	75	50	100	75	75	75	50
Bukedi	BUTALEJA	91.9118	95	100	100	100	75	100	86.6667	100	100	50	100	50	75	75	100	100	100	100	100	100	100	100	100	94.4444	50	100	100	100	100	94.6429	93.75	100	75	100	100	93.75	100	100	100	75	91.6667	75	100	100	100	100	100
Bukedi	BUTEBO	80.8824	65	50	75	100	25	75	76.6667	100	100	50	100	25	75	100	25	100	100	95	100	100	100	100	75	88.8889	50	100	100	75	100	80.3571	62.5	75	0	75	100	75	75	100	75	50	91.6667	75	100	100	100	100	100
Bunyoro	BULIISA	81.6176	80	50	75	100	75	100	81.6667	100	75	75	75	75	75	100	75	100	75	85	75	75	75	100	100	80.5556	75	75	75	75	100	78.5714	75	75	75	75	75	81.25	75	75	75	100	75	75	75	75	83.3333	100	75
Bunyoro	HOIMA	72.7941	65	50	75	100	50	50	70	100	75	50	75	75	75	75	25	100	75	90	75	100	75	100	100	72.2222	50	100	75	50	75	64.2857	50	50	25	50	75	75	75	75	75	75	58.3333	50	75	50	75	75	75
Bunyoro	HOIMA CITY	78.6765	80	100	50	100	50	100	86.6667	100	100	75	100	100	100	75	50	100	75	85	50	100	75	100	100	61.1111	50	50	75	50	75	85.7143	87.5	100	50	100	100	100	100	100	100	100	66.6667	75	50	75	83.3333	100	75
Bunyoro	KAGADI	82.3529	75	50	50	100	75	100	83.3333	100	75	100	75	100	100	75	50	75	100	85	75	100	100	75	75	83.3333	50	100	100	75	75	78.5714	81.25	75	50	100	100	81.25	75	75	75	100	75	75	75	75	75	75	75
Bunyoro	KIBAALE	79.4118	80	50	75	100	75	100	76.6667	100	75	50	75	100	75	75	75	75	75	100	100	100	100	100	100	72.2222	50	75	75	50	100	73.2143	56.25	50	25	75	75	81.25	75	75	75	100	75	75	75	75	83.3333	75	75
Bunyoro	KIKUUBE	80.1471	75	50	75	100	50	100	76.6667	75	100	75	50	100	100	75	50	100	75	75	50	100	75	75	75	91.6667	75	75	100	100	100	73.2143	68.75	75	50	75	75	81.25	75	75	100	75	66.6667	100	75	25	75	75	75
Bunyoro	MASINDI	85.2941	75	50	100	100	50	75	80	100	75	50	75	100	100	100	50	100	100	90	75	100	100	100	75	97.2222	75	100	100	100	100	78.5714	62.5	75	25	75	75	93.75	100	100	75	100	66.6667	75	75	50	91.6667	100	75
Busoga	BUGIRI	78.6765	75	25	100	100	50	100	76.6667	100	75	75	100	25	100	75	50	75	75	90	75	100	100	100	75	77.7778	100	100	100	75	25	62.5	43.75	25	0	50	100	81.25	75	75	100	75	50	25	50	75	75	75	75
Busoga	BUGWERI	64.7059	65	50	75	75	50	75	55	50	50	50	75	50	75	25	50	50	75	80	75	100	75	75	75	72.2222	100	75	100	25	75	57.1429	56.25	25	50	75	75	50	25	50	75	50	66.6667	100	50	50	58.3333	50	50
Busoga	BUYENDE	65.4412	65	25	75	75	75	75	68.3333	75	75	50	75	75	75	50	75	50	75	75	75	75	75	75	75	55.5556	50	50	50	50	75	44.6429	37.5	25	25	50	50	56.25	50	25	100	50	41.6667	25	75	25	41.6667	50	25
Busoga	IGANGA	69.1176	65	50	75	75	75	50	65	75	0	75	75	75	75	75	75	75	75	75	75	75	75	75	75	75	75	75	75	75	75	71.4286	62.5	75	50	75	50	75	75	75	75	75	75	75	75	75	75	75	75
Busoga	JINJA CITY	44.1176	25	25	25	25	25	25	26.6667	25	25	25	25	50	25	25	25	25	25	70	50	75	75	75	75	69.4444	75	50	75	75	75	64.2857	43.75	25	25	100	25	68.75	75	25	100	75	66.6667	75	75	50	83.3333	75	100
Busoga	JINJA DISTRICT	69.1176	50	25	50	75	50	50	73.3333	100	75	50	50	75	50	75	100	75	75	65	50	75	75	75	50	75	75	75	75	75	75	46.4286	56.25	25	25	100	75	56.25	50	75	25	75	41.6667	25	75	25	25	25	25
Busoga	KALIRO	64.7059	65	75	50	75	50	75	66.6667	100	100	25	75	75	75	50	25	75	75	75	75	75	75	75	75	55.5556	50	50	50	50	75	55.3571	56.25	50	25	75	75	68.75	50	75	75	75	33.3333	25	50	25	58.3333	50	50
Busoga	KAMULI	65.4412	60	75	75	50	50	50	63.3333	50	75	75	50	75	75	75	50	75	50	70	75	75	75	75	50	69.4444	75	75	75	75	50	71.4286	87.5	75	100	75	100	68.75	75	75	75	50	50	25	75	50	75	75	75
Busoga	LUUKA	70.5882	70	50	50	100	75	75	73.3333	75	75	50	100	75	75	75	50	75	100	70	75	50	75	75	75	66.6667	50	75	75	75	50	57.1429	50	25	0	100	75	75	75	75	100	50	58.3333	50	75	50	41.6667	75	50
Busoga	MAYUGE	61.0294	50	75	50	75	25	25	68.3333	75	75	50	75	75	75	75	50	75	75	60	75	50	75	50	50	55.5556	50	50	75	50	50	48.2143	37.5	25	25	75	25	62.5	75	50	75	50	33.3333	25	50	25	58.3333	50	75
Busoga	NAMAYINGO	80.1471	75	50	100	75	75	75	85	75	100	75	100	75	75	75	100	75	75	80	75	100	75	75	75	75	75	50	75	100	75	58.9286	68.75	75	75	50	75	62.5	75	50	75	50	58.3333	25	75	75	41.6667	50	50
Busoga	NAMUTUMBA	72.0588	55	25	25	75	75	75	76.6667	75	75	50	75	75	75	100	100	75	75	70	50	75	75	75	75	75	75	75	75	75	75	58.9286	56.25	50	50	75	50	68.75	50	100	75	50	50	50	50	50	58.3333	50	75
Karamoja	ABIM	86.7647	85	75	100	100	50	100	83.3333	100	100	75	100	75	75	75	75	50	75	90	50	100	100	100	100	91.6667	25	100	100	100	100	71.4286	50	25	0	100	75	75	75	75	75	75	66.6667	25	100	75	100	100	100
Karamoja	AMUDAT	49.2647	45	25	50	100	25	25	61.6667	75	100	50	75	50	75	25	25	50	75	40	25	75	50	25	25	36.1111	25	50	50	25	25	39.2857	31.25	25	25	50	25	43.75	25	25	50	75	41.6667	25	75	25	41.6667	25	50
Karamoja	MOROTO	63.9706	60	50	50	100	50	50	71.6667	100	100	50	100	25	50	50	75	50	50	70	50	75	75	100	50	50	50	50	50	50	50	57.1429	62.5	50	25	75	100	62.5	50	50	75	75	50	50	50	50	50	50	50
Karamoja	NABILATUK	70.5882	75	25	50	100	100	100	71.6667	100	100	25	100	25	100	75	25	100	75	65	75	100	25	100	25	69.4444	25	100	75	25	100	67.8571	68.75	75	0	100	100	81.25	75	50	100	100	50	25	100	25	66.6667	100	100
Karamoja	NAKAPIRIPIRIT	80.1471	70	50	75	75	75	75	85	75	75	100	75	100	100	100	75	75	100	85	75	100	100	75	75	75	75	75	75	75	75	80.3571	81.25	75	75	75	100	81.25	75	75	100	75	83.3333	75	75	100	75	75	75
Kigezi	KABALE	89.7059	75	25	100	100	75	75	96.6667	100	100	100	100	75	100	75	100	100	100	90	75	100	100	100	75	86.1111	75	100	100	50	100	78.5714	81.25	75	50	100	100	81.25	75	75	75	100	58.3333	75	75	25	91.6667	75	100
Kigezi	KANUNGU	68.3824	70	25	75	100	75	75	80	100	100	75	100	75	75	75	25	75	100	60	50	75	100	50	25	52.7778	25	75	25	50	75	73.2143	75	100	25	75	100	81.25	75	100	75	75	75	75	75	75	58.3333	75	25
Kigezi	KISORO	78.6765	80	25	100	100	75	100	75	100	75	25	100	100	100	75	25	100	100	90	75	75	100	100	100	77.7778	50	75	75	75	100	82.1429	75	100	25	75	100	87.5	100	75	100	75	83.3333	100	75	75	83.3333	75	75
Kigezi	RUBANDA	77.2059	75	25	75	100	75	100	75	100	100	50	100	75	75	75	25	75	75	85	75	100	100	75	75	77.7778	50	75	75	75	100	66.0714	62.5	75	25	75	75	75	75	75	75	75	50	75	75	0	75	75	75
Kigezi	RUKIGA	69.8529	80	25	100	100	75	100	70	100	75	25	75	75	75	50	75	75	75	80	25	100	100	100	75	58.3333	25	25	100	25	100	71.4286	75	100	0	100	100	68.75	100	25	75	75	58.3333	100	75	0	83.3333	100	75
Kigezi	RUKUNGIRI	57.3529	40	25	25	100	25	25	60	100	75	25	50	75	75	75	25	50	75	60	25	75	75	75	50	61.1111	50	50	50	50	100	75	56.25	50	25	75	75	81.25	75	75	100	75	83.3333	75	75	100	83.3333	75	75
Lango	ALEBTONG	79.4118	75	50	75	100	75	75	75	75	100	75	75	75	75	100	25	100	75	85	75	75	100	100	75	86.1111	75	75	75	100	100	80.3571	75	75	25	100	100	87.5	75	75	100	100	66.6667	100	75	25	91.6667	75	100
Lango	AMOLATAR	83.0882	90	100	100	100	75	75	80	75	75	100	100	100	100	100	25	75	75	80	75	100	100	75	50	86.1111	75	100	100	50	100	87.5	100	100	100	100	100	93.75	100	75	100	100	50	100	25	25	100	100	100
Lango	KOLE	94.1176	80	75	100	100	25	100	93.3333	100	100	50	100	100	100	100	100	100	100	100	100	100	100	100	100	100	100	100	100	100	100	100	100	100	100	100	100	100	100	100	100	100	100	100	100	100	100	100	100
Lango	KWANIA	72.0588	75	50	75	100	75	75	68.3333	75	75	50	100	75	75	75	25	75	75	75	75	75	75	75	75	75	75	75	75	75	75	80.3571	81.25	75	75	75	100	87.5	75	100	100	75	75	75	75	75	75	75	75
Lango	LIRA	73.5294	65	100	75	100	25	25	66.6667	100	100	25	75	25	75	75	25	75	100	90	75	100	100	100	75	80.5556	75	75	75	75	100	71.4286	62.5	25	25	100	100	100	100	100	100	100	25	25	25	25	91.6667	100	75
Lango	OTUKE	83.0882	85	75	75	100	75	100	81.6667	100	100	75	100	75	50	100	25	100	100	90	75	75	100	100	100	80.5556	75	75	75	75	100	73.2143	81.25	75	75	75	100	75	75	75	75	75	58.3333	75	75	25	75	75	75
Lango	OYAM	85.2941	40	25	25	100	25	25	90	100	100	100	100	100	100	100	25	100	100	95	75	100	100	100	100	97.2222	75	100	100	100	100	89.2857	81.25	100	25	100	100	100	100	100	100	100	91.6667	100	100	75	83.3333	100	50
South Buganda	BUKOMANSIMBI	56.6176	45	25	50	75	25	50	58.3333	50	75	50	75	50	50	75	25	75	75	65	75	50	75	75	50	55.5556	50	50	50	50	75	62.5	62.5	75	25	75	75	68.75	50	75	75	75	58.3333	50	75	50	58.3333	75	25
South Buganda	BUTAMBALA	58.0882	40	25	50	75	25	25	60	75	75	50	75	50	50	75	25	75	50	45	50	50	50	50	25	72.2222	50	75	75	75	75	58.9286	62.5	75	25	75	75	62.5	75	50	75	50	58.3333	50	75	50	50	75	25
South Buganda	GOMBA	49.2647	35	25	25	75	25	25	55	75	75	25	75	50	50	75	25	50	50	50	50	50	50	50	50	47.2222	25	50	50	50	50	57.1429	62.5	75	25	75	75	56.25	50	50	75	50	58.3333	50	75	50	50	50	25
South Buganda	KALANGALA	68.3824	40	25	50	75	25	25	78.3333	75	100	50	100	75	75	75	100	50	50	65	75	75	75	50	50	69.4444	25	75	75	75	75	67.8571	62.5	75	25	75	75	75	75	75	75	75	75	75	75	75	58.3333	75	25
South Buganda	KALUNGU	61.7647	65	75	75	75	50	50	66.6667	75	75	50	75	75	50	75	50	75	75	65	50	75	75	75	50	50	50	50	50	50	50	55.3571	62.5	75	25	75	75	56.25	50	50	75	50	50	50	50	50	50	75	25
South Buganda	KYOTERA	65.4412	35	25	50	50	25	25	68.3333	75	75	50	75	75	75	75	50	75	75	75	75	75	75	75	75	72.2222	50	75	75	75	75	60.7143	62.5	75	25	75	75	56.25	50	50	75	50	66.6667	50	75	75	58.3333	75	25
South Buganda	LWENGO	50.7353	35	25	50	50	25	25	55	75	75	25	75	50	50	75	25	50	50	40	25	50	50	50	25	58.3333	25	50	75	50	75	55.3571	62.5	75	25	75	75	50	50	50	50	50	58.3333	50	75	50	50	50	25
South Buganda	LYANTONDE	83.0882	75	25	100	75	75	100	78.3333	75	100	50	100	75	100	100	25	100	100	100	100	100	100	100	100	86.1111	75	75	100	75	100	75	68.75	100	0	100	75	75	75	75	75	75	83.3333	75	100	75	75	75	75
South Buganda	MASAKA	58.8235	50	25	50	75	50	50	65	75	100	25	75	75	75	75	25	75	75	60	25	75	75	75	50	52.7778	25	50	50	50	75	60.7143	62.5	75	25	75	75	62.5	50	50	75	75	58.3333	50	75	50	58.3333	75	25
South Buganda	MASAKA CITY	80.8824	80	100	75	75	75	75	88.3333	100	100	75	100	75	75	75	100	75	75	75	75	75	75	75	75	72.2222	50	75	75	75	75	75	68.75	100	25	75	75	81.25	75	100	75	75	66.6667	75	75	50	83.3333	75	100
South Buganda	MPIGI	66.9118	60	25	75	75	50	75	75	100	100	50	100	75	75	75	25	75	75	70	50	75	75	75	75	55.5556	50	50	50	75	50	64.2857	68.75	100	25	75	75	68.75	50	75	75	75	58.3333	50	75	50	58.3333	75	25
South Buganda	RAKAI	69.8529	65	25	75	75	75	75	68.3333	75	75	50	100	75	75	75	25	75	75	70	75	75	50	75	75	75	75	75	75	75	75	55.3571	62.5	75	25	75	75	56.25	50	50	75	50	50	25	75	50	50	50	25
South Buganda	SSEMBABULE	67.6471	50	25	50	75	50	50	70	75	100	50	75	50	75	75	50	75	75	70	75	75	75	50	75	72.2222	50	75	75	75	75	64.2857	62.5	75	25	75	75	68.75	50	75	75	75	58.3333	50	75	50	66.6667	75	50
Teso	AMURIA	60.2941	60	25	50	100	25	100	60	75	75	25	75	50	75	75	25	75	75	85	75	100	100	100	50	47.2222	25	0	75	25	100	76.7857	68.75	0	75	100	100	81.25	75	75	100	75	75	75	100	50	83.3333	75	75
Teso	BUKEDEA	72.0588	75	25	75	100	75	100	68.3333	75	75	25	100	25	75	75	75	75	75	75	50	100	75	100	50	75	75	75	75	50	100	42.8571	62.5	25	75	75	75	37.5	25	25	75	25	33.3333	50	25	25	33.3333	25	50
Teso	KABERAMAIDO	86.0294	80	75	75	100	75	75	85	100	100	75	100	75	75	75	75	75	75	85	75	75	100	100	75	91.6667	75	100	100	75	100	83.9286	87.5	75	75	100	100	87.5	100	75	100	75	75	100	75	50	83.3333	75	75
Teso	KALAKI	62.5	65	25	50	100	50	100	63.3333	75	75	50	100	50	50	100	25	50	50	70	50	100	75	75	50	55.5556	50	50	50	50	75	55.3571	50	0	50	75	75	62.5	75	50	75	50	33.3333	0	75	25	75	75	75
Teso	KAPELEBBYONG	57.3529	55	25	25	100	25	100	58.3333	75	75	75	75	50	50	75	25	25	25	75	50	100	100	100	25	47.2222	25	25	50	25	100	67.8571	50	0	0	100	100	87.5	100	75	100	75	50	25	75	50	83.3333	75	75
Teso	KATAKWI	60.2941	65	75	25	100	25	100	65	100	100	75	75	25	25	75	25	50	50	45	25	75	25	75	25	58.3333	25	75	75	25	75	69.6429	56.25	25	0	100	100	62.5	75	25	75	75	83.3333	75	100	75	83.3333	75	75
Teso	KUMI	79.4118	65	25	75	100	25	100	78.3333	100	100	100	50	100	100	100	25	25	100	95	100	75	100	100	100	80.5556	25	100	100	50	100	78.5714	75	25	75	100	100	100	100	100	100	100	58.3333	75	75	25	75	25	100
Teso	NGORA	58.0882	50	25	25	100	25	75	58.3333	100	75	25	100	25	25	75	50	25	25	75	25	100	100	75	75	52.7778	75	25	50	25	100	73.2143	68.75	0	75	100	100	93.75	100	75	100	100	41.6667	25	75	25	83.3333	75	75
Teso	SERERE	55.8824	60	25	25	100	50	100	55	100	75	50	50	25	75	75	25	25	25	70	25	100	100	75	50	47.2222	75	25	25	25	100	69.6429	62.5	0	75	100	75	81.25	75	50	100	100	50	50	75	25	83.3333	75	75
Teso	SOROTI CITY	67.6471	55	25	25	100	25	100	73.3333	100	100	50	100	50	100	100	50	25	25	80	50	100	100	50	100	58.3333	75	50	50	25	100	82.1429	75	25	75	100	100	87.5	100	75	100	75	83.3333	100	100	50	83.3333	75	75
Tooro-Rwenzori	FORT PORTAL CITY	76.4706	70	100	100	50	0	100	76.6667	100	100	75	100	25	25	100	100	25	25	70	25	100	75	75	75	83.3333	100	25	100	100	100	98.2143	100	100	100	100	100	100	100	100	100	100	91.6667	75	100	100	100	100	100
Tooro-Rwenzori	KABAROLE	67.6471	85	100	100	100	25	100	66.6667	100	100	0	100	25	100	50	25	75	100	70	25	100	100	100	25	58.3333	25	100	100	25	25	60.7143	81.25	100	25	100	100	56.25	25	25	100	75	50	25	100	25	50	100	50
Tooro-Rwenzori	KASESE	33.0882	40	50	50	50	25	25	36.6667	50	50	25	50	25	25	50	25	25	25	30	50	25	25	25	25	25	25	25	25	25	25	57.1429	56.25	75	25	75	50	75	50	75	100	75	50	25	100	25	41.6667	75	25
Tooro-Rwenzori	NTOROKO	91.1765	100	100	100	100	100	100	80	100	100	25	100	100	100	100	25	100	100	100	100	100	100	100	100	100	100	100	100	100	100	83.9286	62.5	100	25	25	100	81.25	25	100	100	100	100	100	100	100	100	100	100
West Nile	ADJUMANI	88.2353	100	100	100	100	100	100	75	100	75	75	100	75	100	75	25	50	75	95	75	100	100	100	100	100	100	100	100	100	100	83.9286	81.25	100	25	100	100	100	100	100	100	100	50	25	100	25	100	100	100
West Nile	ARUA CITY	65.4412	65	75	75	75	50	50	68.3333	75	75	75	75	75	75	50	50	50	75	70	50	75	75	75	75	58.3333	25	75	75	50	50	73.2143	68.75	75	50	75	75	75	75	75	75	75	75	75	75	75	75	75	75
West Nile	MOYO	72.7941	65	25	75	75	75	75	68.3333	75	75	75	75	75	75	75	25	75	75	80	75	75	75	100	75	80.5556	75	75	75	75	100	75	75	75	25	100	100	81.25	75	75	100	75	58.3333	75	75	25	83.3333	75	75
West Nile	NEBBI	91.1765	70	50	100	100	50	50	100	100	100	100	100	100	100	100	100	100	100	90	100	100	100	100	50	88.8889	50	100	100	75	100	75	81.25	75	75	100	75	87.5	75	75	100	100	58.3333	50	75	50	66.6667	75	75
West Nile	OBONGI	63.2353	70	25	25	100	100	100	65	100	75	100	100	25	25	75	25	25	25	80	75	100	100	100	25	47.2222	75	25	100	25	25	73.2143	81.25	100	25	100	100	87.5	75	75	100	100	50	25	100	25	66.6667	100	100
West Nile	PAKWACH	72.7941	85	25	100	100	100	100	78.3333	100	100	50	100	50	100	75	25	100	100	90	50	100	100	100	100	47.2222	75	25	50	75	25	78.5714	62.5	25	25	100	100	100	100	100	100	100	50	25	100	25	100	100	100
West Nile	TEREGO	50	55	25	25	75	75	75	51.6667	100	75	75	25	25	75	25	25	25	25	65	25	100	75	75	50	36.1111	25	25	75	25	25	51.7857	56.25	75	25	50	75	62.5	50	25	100	75	41.6667	25	75	25	41.6667	75	50
West Nile	YUMBE	82.3529	90	100	75	100	75	100	81.6667	100	100	75	100	50	100	50	50	100	75	90	75	100	100	100	75	75	75	75	75	50	100	82.1429	93.75	100	75	100	100	68.75	50	50	100	75	91.6667	100	75	100	75	100	50
	Grand Total	72.5034	67.907	50.8721	69.186	88.9535	56.1047	74.4186	72.6163	87.7907	85.1744	58.4302	84.8837	65.6977	75.5814	76.1628	46.5116	72.3837	73.8372	77.2093	65.407	85.7558	83.7209	82.2674	68.8953	72.2545	60.1744	71.2209	77.6163	65.407	80.814	71.7193	69.3314	66.2791	41.2791	84.8837	84.8837	77.8343	73.8372	72.6744	87.2093	77.6163	64.6318	62.7907	78.1977	52.907	73.8372	77.0349	68.8953
[truncated: 91 more columns]

## Sheet: All Functionality Outcomes Cond
Inherent Resilience	Awareness Capacity	Diversity Capacity	Mobilization Capacity	Transformation Capacity	Targeted Resilience	Coordination Capacity	Laboratory Capacity	Leadership Capacity	Monitoring Capacity	Resilience Overall	Effectiveness of Care	User Experiences	User Safety	Quality Overall	Health Seeking Behaviours	Individual Health Action	Demand Overall	Financial Access	Physical Access	Socio-cultural Access	Access Overall		Functionality Overall		Districts- Region		Outcomes Overall		Determinants of Health	Economic/Commerical Determinants	Environmental Determinants	Political and Security Determinants	Social Determinants	Health Security Maximization	Detection of Health Threats	Organization and Leadership	Prevention of Health Threats	Response to Health Threats	Universal Health Coverage	All Life Chorts Essential Services	Coverage of Essential Services	Financial Risk Protection	PHC	Stakeholder Alignment	Empower Individuals & Communities	Financing	Human Resources for Health	Knowledge production capacity	Technology
74.2647	80	68.3333	75	80.5556	82.1429	75	87.5	75	91.6667	77.8226	85	100	95	93.75	75	79.1667	77.0833	81.25	76.5625	100	81.25		80.7018		AGAGO-Acholi		71.25		69.7917	75	80	54.1667	71.875	79.5455	95	77.5	72.9167	75	73.8924	69.3182	90.1786	71.4844	57	78.125	25	55	78.125	68.75	37.5
87.5	85	83.3333	85	97.2222	82.1429	87.5	87.5	83.3333	66.6667	85.0806	80	95.8333	70	82.8125	87.5	70.8333	79.1667	62.5	35.2941	93.75	49		76.3043		AMURU-Acholi		60.5833		77.6042	70	87.5	89.5833	67.1875	89.2045	100	82.5	95.8333	79.1667	49.3671	43.1818	45.5357	57.4219	54.5	53.125	59.375	62.5	53.125	34.375	62.5
77.2059	80	75	75	80.5556	69.6429	62.5	81.25	58.3333	75	73.7903	80	75	75	76.5625	66.6667	66.6667	66.6667	100	23.4375	87.5	46.875		67.7632		GULU-Acholi		39.5833		37.5	37.5	42.5	37.5	34.375	44.3182	50	50	41.6667	37.5	40.3481	36.7424	44.6429	42.1875	35	37.5	37.5	37.5	34.375	25	37.5
82.3529	80	88.3333	80	75	89.2857	93.75	87.5	91.6667	83.3333	85.4839	85	91.6667	95	90.625	79.1667	79.1667	79.1667	100	80.5556	81.25	83.6538		85.1293		GULU CITY-Acholi		81.5		70.8333	75	70	75	65.625	82.9545	80	95	79.1667	79.1667	86.5506	76.5152	85.7143	97.2656	74.5	75	75	75	75	71.875	75
90.4412	70	93.3333	85	100	100	100	100	100	100	94.7581	95	95.8333	100	96.875	100	100	100	100	70.8333	93.75	78.8462		92.0259		KITGUM
79.4118	80	80	70	83.3333	73.2143	56.25	81.25	75	83.3333	76.6129	95	100	70	89.0625	87.5	87.5	87.5	100	26.4706	100	50		73.6957		LAMWO-Acholi		40.5		35.9375	30	32.5	31.25	45.3125	44.8864	47.5	40	47.9167	43.75	41.6139	40.5303	43.75	41.7969	37.5	37.5	37.5	37.5	37.5	37.5	37.5
88.9706	85	81.6667	95	100	87.5	100	87.5	66.6667	91.6667	88.3065	70	66.6667	75	70.3125	95.8333	75	85.4167	100	82.8125	93.75	87.5		85.307		NWOYA- Acholi
66.9118	65	61.6667	70	75	89.2857	81.25	100	75	100	77.0161	30	83.3333	85	67.1875	100	95.8333	97.9167	93.75	23.4375	75	43.75		70.8333		OMORO- Acholi
91.9118	100	81.6667	100	100	91.0714	87.5	93.75	91.6667	91.6667	91.5323	80	91.6667	85	85.9375	83.3333	91.6667	87.5	68.75	80.8824	62.5	76		86.9565		BUDUDA-Bugisu-Elgon		79.0833		81.7708	67.5	85	87.5	84.375	89.7727	97.5	85	79.1667	97.9167	79.7468	83.3333	93.75	69.9219	65	93.75	100	60	56.25	21.875	59.375
88.9706	90	83.3333	85	100	83.9286	87.5	93.75	75	75	86.6935	85	91.6667	75	84.375	75	87.5	81.25	75	81.9444	75	79.8077		84.2672		MANAFWA-Bugisu-Elgon		78.3333		81.7708	67.5	90	95.8333	75	88.6364	95	80	85.4167	93.75	79.5886	85.9848	98.2143	64.8438	62	84.375	90.625	42.5	59.375	56.25	43.75
85.2941	85	80	95	88.8889	82.1429	62.5	87.5	83.3333	100	83.871	90	87.5	85	87.5	95.8333	83.3333	89.5833	81.25	81.9444	81.25	81.7308		84.4828		MBALE-Bugisu-Elgon		74.6667		74.4792	65	77.5	70.8333	81.25	85.2273	92.5	85	89.5833	75	74.6835	81.4394	88.3929	61.7188	65.5	87.5	100	35	50	78.125	50
69.8529	65	66.6667	75	75	83.9286	87.5	93.75	75	75	76.2097	65	70.8333	55	64.0625	62.5	70.8333	66.6667	81.25	77.9412	93.75	81		74.5652		MBALE CITY-Bugisu-Elgon
91.9118	95	86.6667	100	94.4444	94.6429	93.75	93.75	91.6667	100	93.1452	95	95.8333	100	96.875	95.8333	91.6667	93.75	87.5	82.8947	100	86.1111		92.094		BUTALEJA-Bukedi		77.0833		79.6875	72.5	100	66.6667	81.25	89.2045	95	92.5	85.4167	85.4167	76.7405	84.0909	87.5	64.4531	65	93.75	75	25	62.5	87.5	56.25
80.8824	65	76.6667	95	88.8889	80.3571	62.5	75	91.6667	100	80.6452	85	79.1667	80	81.25	95.8333	91.6667	93.75	75	83.3333	87.5	82.6923		82.5431		BUTEBO-Bukedi		63.5833		61.4583	65	70	50	62.5	77.8409	87.5	75	70.8333	79.1667	63.2911	78.7879	87.5	36.7188	54	75	75	30	46.875	65.625	37.5
81.6176	80	81.6667	85	80.5556	78.5714	75	81.25	75	83.3333	80.2419	85	79.1667	70	78.125	70.8333	79.1667	75	93.75	73.6842	81.25	77.7778		78.8462		BULIISA-Bunyoro		68.5833		69.7917	65	80	75	62.5	81.8182	90	82.5	70.8333	85.4167	65.8228	66.2879	71.4286	62.8906	64.5	75	75	40	75	62.5	65.625
72.7941	65	70	90	72.2222	64.2857	50	75	58.3333	75	68.9516	35	70.8333	60	56.25	66.6667	66.6667	66.6667	93.75	29.4118	75	47		62.1739		HOIMA-Bunyoro		28.8333		25.5208	0	35	22.9167	37.5	36.3636	42.5	40	29.1667	35.4167	29.2722	28.0303	35.7143	27.7344	24	37.5	43.75	2.5	31.25	18.75	15.625
78.6765	80	86.6667	85	61.1111	85.7143	87.5	100	66.6667	83.3333	81.8548	80	87.5	65	78.125	66.6667	91.6667	79.1667	100	88.1579	100	91.6667		83.3333		HOIMA CITY-Bunyoro		75.75		74.4792	75	75	72.9167	75	80.1136	90	72.5	68.75	89.5833	79.5886	79.5455	88.3929	75.7812	61	87.5	71.875	70	25	59.375	50
82.3529	75	83.3333	85	83.3333	78.5714	81.25	81.25	75	75	80.6452	85	75	55	71.875	70.8333	87.5	79.1667	68.75	73.6111	93.75	75.9615		78.2328		KAGADI-Bunyoro		65.6667		57.2917	42.5	80	52.0833	56.25	71.0227	72.5	77.5	66.6667	68.75	72.1519	68.1818	75.8929	74.6094	48.5	62.5	75	50	40.625	25	37.5
79.4118	80	76.6667	100	72.2222	73.2143	56.25	81.25	75	83.3333	76.6129	35	75	60	57.8125	75	75	75	62.5	30	62.5	39.2857		65.0424		KIBAALE-Bunyoro		36.5		34.8958	37.5	37.5	35.4167	31.25	37.5	37.5	35	39.5833	37.5	38.9241	36.3636	37.5	42.1875	29.5	37.5	43.75	22.5	21.875	25	28.125
80.1471	75	76.6667	75	91.6667	73.2143	68.75	81.25	66.6667	75	77.0161	35	75	75	62.5	87.5	83.3333	85.4167	100	26.3889	75	45.1923		68.75		KIKUUBE-Bunyoro		33.0833		29.6875	17.5	32.5	29.1667	35.9375	38.6364	42.5	37.5	35.4167	39.5833	34.8101	29.9242	29.4643	42.1875	26	37.5	37.5	25	21.875	15.625	18.75
85.2941	75	80	90	97.2222	78.5714	62.5	93.75	66.6667	91.6667	82.2581	85	70.8333	65	73.4375	83.3333	75	79.1667	81.25	76.3158	87.5	78.7037		79.9145		MASINDI-Bunyoro		68.3333		67.1875	67.5	75	70.8333	59.375	76.1364	75	80	70.8333	79.1667	68.5127	57.9545	76.7857	75.7812	62	68.75	68.75	55	68.75	56.25	56.25
78.6765	75	76.6667	90	77.7778	62.5	43.75	81.25	50	75	71.371	75	66.6667	90	76.5625	79.1667	83.3333	81.25	75	79.1667	50	74.0385		73.7069		BUGIRI-Busoga		69.3333		61.4583	65	60	47.9167	70.3125	60.2273	85	45	50	62.5	74.3671	72.7273	74.1071	76.1719	69	81.25	96.875	67.5	56.25	62.5	50
64.7059	65	55	80	72.2222	57.1429	56.25	50	66.6667	58.3333	61.2903	35	66.6667	45	50	79.1667	75	77.0833	56.25	30.2632	68.75	39.8148		56.4103		BUGWERI-Busoga		28.1667		27.0833	30	32.5	31.25	18.75	31.8182	27.5	35	29.1667	35.4167	29.5886	28.7879	33.9286	28.5156	21.5	31.25	31.25	17.5	12.5	18.75	18.75
65.4412	65	68.3333	75	55.5556	44.6429	37.5	56.25	41.6667	41.6667	56.0484	85	66.6667	60	70.3125	66.6667	66.6667	66.6667	56.25	23.4375	62.5	35.4167		54.8246		BUYENDE-Busoga		28.1667		30.2083	17.5	37.5	41.6667	25	29.5455	22.5	27.5	35.4167	31.25	27.6899	25	37.5	26.1719	26.5	37.5	37.5	17.5	21.875	28.125	18.75
69.1176	65	65	75	75	71.4286	62.5	75	75	75	70.1613	75	91.6667	75	81.25	75	83.3333	79.1667	87.5	78.9474	100	83.3333		75.641		IGANGA-Busoga		75.5833		57.2917	35	72.5	70.8333	51.5625	72.1591	82.5	47.5	79.1667	77.0833	84.4937	77.2727	80.3571	93.75	68	68.75	90.625	52.5	62.5	62.5	75
44.1176	25	26.6667	70	69.4444	64.2857	43.75	68.75	66.6667	83.3333	53.2258	85	83.3333	70	79.6875	45.8333	70.8333	58.3333	75	65.625	75	68.75		60.7456		JINJA CITY-Busoga		32.0833		33.3333	35	35	33.3333	31.25	35.2273	37.5	32.5	33.3333	37.5	30.538	26.1364	34.8214	33.2031	33	37.5	37.5	32.5	31.25	28.125	31.25
69.1176	50	73.3333	65	75	46.4286	56.25	56.25	41.6667	25	58.871	75	83.3333	55	71.875	62.5	75	68.75	93.75	69.7368	62.5	72.2222		64.7436		JINJA DISTRICT-Busoga		67.5		60.4167	57.5	60	72.9167	53.125	54.5455	45	60	54.1667	58.3333	74.3671	53.7879	77.6786	94.1406	64	56.25	84.375	50	100	53.125	43.75
64.7059	65	66.6667	75	55.5556	55.3571	56.25	68.75	33.3333	58.3333	60.4839	60	58.3333	40	53.125	70.8333	66.6667	68.75	93.75	44.4444	68.75	55.7692		59.2672		KALIRO-Busoga		34		36.9792	32.5	42.5	37.5	35.9375	30.1136	35	32.5	22.9167	31.25	37.6582	34.4697	42.8571	38.6719	23	28.125	18.75	27.5	25	12.5	25
65.4412	60	63.3333	70	69.4444	71.4286	87.5	68.75	50	75	68.1452	60	66.6667	50	59.375	66.6667	66.6667	66.6667	81.25	70.8333	62.5	71.1538		67.4569		KAMULI-Busoga		70.5		55.2083	35	60	75	50	60.7955	57.5	80	70.8333	37.5	78.9557	63.2576	67.8571	100	67	100	93.75	40	78.125	40.625	56.25
70.5882	70	73.3333	70	66.6667	57.1429	50	75	58.3333	41.6667	64.5161	30	70.8333	60	54.6875	75	66.6667	70.8333	50	16.6667	56.25	29.3478		56.6372		LUUKA-Busoga		34.75		30.2083	35	27.5	27.0833	31.25	40.3409	45	40	39.5833	37.5	35.7595	34.0909	32.1429	39.0625	31	34.375	34.375	30	31.25	34.375	21.875
61.0294	50	68.3333	60	55.5556	48.2143	37.5	62.5	33.3333	58.3333	55.2419	60	75	55	64.0625	66.6667	66.6667	66.6667	68.75	62.5	68.75	64.4231		59.6983		MAYUGE-Busoga		68.3333		64.5833	77.5	67.5	66.6667	53.125	64.7727	67.5	55	70.8333	64.5833	75.1582	75	79.4643	73.4375	53.5	56.25	65.625	52.5	71.875	37.5	37.5
80.1471	75	85	80	75	58.9286	68.75	62.5	58.3333	41.6667	70.5645	70	54.1667	70	64.0625	66.6667	79.1667	72.9167	87.5	23.4375	68.75	41.6667		63.8158		NAMAYINGO-Busoga		35.25		41.1458	35	45	45.8333	39.0625	30.6818	30	25	35.4167	31.25	34.1772	29.1667	31.25	40.625	37	37.5	28.125	32.5	40.625	31.25	53.125
72.0588	55	76.6667	70	75	58.9286	56.25	68.75	50	58.3333	66.129	90	87.5	70	82.8125	75	75	75	62.5	40.2778	81.25	50		65.7328		NAMUTUMBA-Busoga		36.6667		34.8958	35	30	39.5833	34.375	38.6364	37.5	40	41.6667	35.4167	37.1835	37.1212	37.5	37.1094	35	34.375	37.5	35	37.5	37.5	28.125
86.7647	85	83.3333	90	91.6667	71.4286	50	75	66.6667	100	79.8387	65	70.8333	80	71.875	91.6667	91.6667	91.6667	68.75	85.2941	93.75	84		80.8696		ABIM-Karamoja		63.3333		64.0625	65	45	66.6667	73.4375	66.4773	65	75	56.25	70.8333	68.3544	60.6061	71.4286	75	44	56.25	56.25	30	62.5	25	37.5
49.2647	45	61.6667	40	36.1111	39.2857	31.25	43.75	41.6667	41.6667	44.7581	25	50	45	40.625	75	75	75	68.75	50	56.25	55		49.3182		AMUDAT-Karamoja		52.0833		39.5833	25	25	54.1667	46.875	71.0227	72.5	57.5	58.3333	93.75	51.8987	39.7727	54.4643	63.2812	48	68.75	59.375	42.5	53.125	21.875	43.75
63.9706	60	71.6667	70	50	57.1429	62.5	62.5	50	50	60.8871	100	62.5	70	76.5625	50	75	62.5	93.75	75	56.25	75		66.3793		MOROTO-Karamoja		65.6667		43.2292	40	42.5	50	40.625	59.6591	72.5	70	47.9167	52.0833	77.5316	70.4545	67.8571	89.0625	55	56.25	75	65	40.625	50	40.625
70.5882	75	71.6667	65	69.4444	67.8571	68.75	81.25	50	66.6667	69.3548	60	91.6667	90	81.25	79.1667	83.3333	81.25	100	26.3889	87.5	47.1154		67.2414		NABILATUK-Karamoja		35.0833		31.7708	20	25	31.25	43.75	44.3182	47.5	50	47.9167	33.3333	33.0696	27.6515	39.2857	35.9375	36.5	50	34.375	50	37.5	25	18.75
80.1471	70	85	85	75	80.3571	81.25	81.25	83.3333	75	80.2419	25	95.8333	90	71.875	91.6667	70.8333	81.25	75	23.6842	68.75	37.963		69.4444		NAKAPIRIPIRIT-Karamoja		34.75		38.0208	35	30	37.5	45.3125	33.5227	30	40	33.3333	31.25	34.6519	34.4697	33.9286	35.1562	33	37.5	50	22.5	43.75	21.875	25
																									NAPAK-Karamoja		60.5		72.3958	75	70	81.25	65.625	68.75	82.5	57.5	70.8333	64.5833	51.2658	71.2121	83.0357	16.7969	71	81.25	93.75	45	96.875	37.5	78.125
89.7059	75	96.6667	90	86.1111	78.5714	81.25	81.25	58.3333	91.6667	84.6774	90	95.8333	90	92.1875	91.6667	100	95.8333	100	73.6842	87.5	79.6296		85.6838		KABALE-Kigezi		83.5833		77.0833	70	85	85.4167	70.3125	88.0682	90	90	85.4167	87.5	87.0253	84.4697	88.3929	89.0625	75	93.75	100	77.5	50	78.125	50
68.3824	70	80	60	52.7778	73.2143	75	81.25	75	58.3333	70.5645	75	70.8333	55	67.1875	41.6667	70.8333	56.25	75	79.4118	62.5	76		69.7826		KANUNGU-Kigezi		82.6667		75	70	87.5	77.0833	68.75	92.6136	95	90	85.4167	100	84.8101	86.7424	86.6071	82.0312	74.5	81.25	71.875	65	96.875	71.875	62.5
78.6765	80	75	90	77.7778	82.1429	75	87.5	83.3333	83.3333	80.2419	70	83.3333	55	70.3125	87.5	91.6667	89.5833	68.75	66.0714	87.5	70.4545		77.9018		KISORO-Kigezi		65.0833		61.4583	60	60	66.6667	59.375	77.2727	80	80	75	75	63.9241	70.4545	62.5	57.8125	61.5	71.875	62.5	50	100	50	37.5
77.2059	75	75	85	77.7778	66.0714	62.5	75	50	75	72.1774	40	79.1667	75	65.625	83.3333	75	79.1667	43.75	27.7778	62.5	35.5769		63.7931		RUBANDA-Kigezi		35.3333		27.6042	25	32.5	22.9167	29.6875	34.6591	37.5	32.5	29.1667	39.5833	38.9241	39.0152	41.9643	37.5	32	34.375	43.75	30	31.25	25	28.125
69.8529	80	70	80	58.3333	71.4286	75	68.75	58.3333	83.3333	70.5645	40	91.6667	75	70.3125	100	87.5	93.75	56.25	30.5556	81.25	42.3077		66.5948		RUKIGA-Kigezi		39.1667		31.25	37.5	27.5	29.1667	31.25	40.9091	40	40	41.6667	41.6667	43.3544	40.9091	41.0714	46.875	32	37.5	43.75	35	28.125	28.125	18.75
57.3529	40	60	60	61.1111	75	56.25	81.25	83.3333	83.3333	65.3226	70	75	65	70.3125	66.6667	62.5	64.5833	56.25	76.4706	68.75	72		67.3913		RUKUNGIRI-Kigezi		69.4167		67.1875	72.5	60	79.1667	59.375	65.3409	60	82.5	66.6667	54.1667	76.4241	73.4848	77.6786	78.9062	53	25	78.125	40	62.5	56.25	59.375
79.4118	75	75	85	86.1111	80.3571	75	87.5	66.6667	91.6667	79.8387	65	70.8333	65	67.1875	75	79.1667	77.0833	100	26.3889	75	45.1923		70.0431		ALEBTONG-Lango		41.0833		35.9375	42.5	35	37.5	31.25	44.3182	47.5	45	41.6667	43.75	42.7215	38.2576	44.6429	46.4844	38	37.5	37.5	40	40.625	31.25	40.625
83.0882	90	80	80	86.1111	87.5	100	93.75	50	100	85.0806	80	91.6667	75	82.8125	75	75	75	100	82.5	93.75	86.6071		84.1102		AMOLATAR-Lango
94.1176	80	93.3333	100	100	100	100	100	100	100	96.7742	85	100	85	90.625	87.5	100	93.75	100	27.7778	100	50		85.1293		KOLE-Lango		40.9167		36.9792	40	37.5	37.5	34.375	46.5909	50	45	50	41.6667	42.4051	39.3939	42.8571	45.3125	35	46.875	37.5	40	34.375	18.75	31.25
72.0588	75	68.3333	75	75	80.3571	81.25	87.5	75	75	75.8065	85	75	70	76.5625	70.8333	75	72.9167	93.75	26.3889	75	44.2308		68.5345		KWANIA-Lango		38.6667		34.8958	37.5	32.5	37.5	32.8125	39.7727	40	45	35.4167	39.5833	40.1899	36.7424	38.3929	44.5312	36.5	37.5	40.625	37.5	37.5	31.25	34.375
73.5294	65	66.6667	90	80.5556	71.4286	62.5	100	25	91.6667	72.5806	55	75	75	68.75	50	66.6667	58.3333	25	28.125	87.5	37.5		63.1579		LIRA-Lango		76.5833		73.9583	55	50	83.3333	93.75	82.9545	75	72.5	93.75	87.5	79.1139	78.7879	83.0357	77.7344	65.5	75	90.625	52.5	81.25	50	46.875
83.0882	85	81.6667	90	80.5556	73.2143	81.25	75	58.3333	75	78.629	75	83.3333	80	79.6875	87.5	91.6667	89.5833	100	29.1667	93.75	50		73.4914		OTUKE-Lango		39.0833		38.5417	37.5	40	39.5833	37.5	41.4773	47.5	37.5	41.6667	39.5833	38.9241	34.4697	40.1786	42.9688	38	40.625	37.5	37.5	37.5	34.375	40.625
85.2941	40	90	95	97.2222	89.2857	81.25	100	91.6667	83.3333	87.0968	90	95.8333	60	82.8125	83.3333	87.5	85.4167	100	85	100	90.2174		86.9469		OYAM-Lango		78.5833		69.7917	40	80	62.5	87.5	90.3409	100	80	89.5833	91.6667	79.7468	84.4697	94.6429	68.3594	73	84.375	87.5	40	68.75	75	90.625
																									BUIKWE-North Buganda		65.4167		59.8958	55	65	52.0833	65.625	67.6136	62.5	60	79.1667	66.6667	71.8354	72.3485	87.5	64.4531	48.5	75	71.875	25	40.625	40.625	43.75
																									KIBOGA-North Buganda		65.4167		43.75	55	40	37.5	43.75	61.9318	72.5	45	64.5833	64.5833	77.5316	75	86.6071	76.1719	51	75	87.5	25	46.875	25	53.125
56.6176	45	58.3333	65	55.5556	62.5	62.5	68.75	58.3333	58.3333	59.2742	60	75	65	67.1875	58.3333	62.5	60.4167	93.75	20.3125	75	41.6667		56.7982		BUKOMANSIMBI-South Buganda		33.75		29.1667	32.5	32.5	27.0833	26.5625	31.25	37.5	30	31.25	27.0833	38.1329	29.1667	32.1429	50	26.5	25	37.5	20	34.375	21.875	21.875
58.0882	40	60	45	72.2222	58.9286	62.5	62.5	58.3333	50	58.4677	70	75	65	70.3125	66.6667	66.6667	66.6667	100	58.8235	75	68		63.0435		BUTAMBALA-South Buganda		59.8333		46.875	35	60	50	43.75	59.0909	75	65	45.8333	54.1667	68.5127	43.9394	54.4643	100	45.5	37.5	50	45	53.125	50	37.5
49.2647	35	55	50	47.2222	57.1429	62.5	56.25	58.3333	50	52.8226	25	75	60	54.6875	66.6667	66.6667	66.6667	100	18.3333	75	42.3913		52.4336		GOMBA-South Buganda		27.6667		23.4375	17.5	30	22.9167	23.4375	25	30	27.5	20.8333	22.9167	33.0696	19.697	25.8929	50	17	18.75	15.625	20	15.625	15.625	15.625
68.3824	40	78.3333	65	69.4444	67.8571	62.5	75	75	58.3333	68.1452	75	79.1667	65	73.4375	66.6667	70.8333	68.75	93.75	23.6842	75	41.6667		62.8205		KALANGALA-South Buganda		31.1667		29.1667	25	32.5	31.25	28.125	31.8182	37.5	30	29.1667	31.25	34.1772	22.3485	25.8929	50	23	21.875	28.125	17.5	31.25	21.875	18.75
61.7647	65	66.6667	65	50	55.3571	62.5	56.25	50	50	58.871	70	66.6667	60	65.625	58.3333	66.6667	62.5	93.75	61.3636	75	71.0526		62.3853		KALUNGU-South Buganda		59.0833		44.7917	42.5	50	47.9167	40.625	61.3636	65	60	56.25	64.5833	68.5127	48.4848	49.1071	97.6562	41	31.25	65.625	45	53.125	34.375	15.625
65.4412	35	68.3333	75	72.2222	60.7143	62.5	56.25	66.6667	58.3333	63.3065	75	79.1667	65	73.4375	79.1667	79.1667	79.1667	100	63.8889	93.75	74.0385		68.75		KYOTERA-South Buganda		70.3333		59.375	50	70	70.8333	50	68.1818	80	60	58.3333	75	82.4367	65.9091	81.25	100	44.5	56.25	68.75	30	56.25	40.625	18.75
50.7353	35	55	40	58.3333	55.3571	62.5	50	58.3333	50	52.8226	70	70.8333	50	64.0625	54.1667	58.3333	56.25	93.75	23.6111	75	42.3077		52.3707		LWENGO-South Buganda		28.4167		22.9167	15	25	29.1667	21.875	23.2955	25	30	22.9167	16.6667	33.5443	20.4545	26.7857	50	22	18.75	25	22.5	21.875	25	18.75
83.0882	75	78.3333	100	86.1111	75	68.75	75	83.3333	75	79.4355	80	100	85	89.0625	95.8333	95.8333	95.8333	62.5	70.3125	100	73.9583		81.3596		LYANTONDE-South Buganda		65.6667		54.1667	40	57.5	62.5	54.6875	62.5	70	62.5	62.5	56.25	75.7911	57.197	64.2857	100	47.5	40.625	56.25	47.5	43.75	62.5	34.375
58.8235	50	65	60	52.7778	60.7143	62.5	62.5	58.3333	58.3333	59.6774	65	75	55	65.625	50	66.6667	58.3333	100	18.3333	75	42.3913		56.8584		MASAKA DISTRICT-South Buganda		32.9167		28.6458	30	35	29.1667	23.4375	36.3636	37.5	37.5	33.3333	37.5	35.443	23.8636	29.4643	50	26	21.875	28.125	22.5	37.5	31.25	15.625
80.8824	80	88.3333	75	72.2222	75	68.75	81.25	66.6667	83.3333	78.2258	75	83.3333	75	78.125	87.5	95.8333	91.6667	100	66.6667	100	76.9231		79.3103		MASAKA CITY
66.9118	60	75	70	55.5556	64.2857	68.75	68.75	58.3333	58.3333	65.7258	60	75	60	65.625	66.6667	75	70.8333	93.75	54.6875	75	64.5833		66.0088		MPIGI-South Buganda		64.25		62.5	55	65	70.8333	59.375	61.3636	65	55	62.5	62.5	70.7278	48.4848	56.25	100	48	37.5	68.75	50	62.5	31.25	37.5
69.8529	65	68.3333	70	75	55.3571	62.5	56.25	50	50	63.3065	70	75	55	67.1875	54.1667	54.1667	54.1667	100	65.2778	75	72.1154		64.8707		RAKAI-South Buganda		63.3333		45.8333	47.5	45	45.8333	45.3125	67.0455	75	65	66.6667	62.5	73.7342	53.0303	62.5	100	44	40.625	50	40	46.875	59.375	28.125
67.6471	50	70	70	72.2222	64.2857	62.5	68.75	58.3333	66.6667	66.129	65	75	65	68.75	62.5	70.8333	66.6667	100	59.375	81.25	69.7917		67.3246		SEMBABULE-South Buganda		61.75		60.4167	50	65	70.8333	56.25	60.2273	70	60	54.1667	58.3333	68.3544	42.4242	57.1429	100	43.5	37.5	65.625	45	68.75	25	18.75
60.2941	60	60	85	47.2222	76.7857	68.75	81.25	75	83.3333	67.7419	60	62.5	65	62.5	75	83.3333	79.1667	62.5	70.5882	68.75	69		68.4783		AMURIA-Teso		61.3333		71.875	60	70	79.1667	75	51.1364	35	70	45.8333	54.1667	64.557	59.8485	76.7857	64.0625	50	62.5	75	45	43.75	25	50
72.0588	75	68.3333	75	75	42.8571	62.5	37.5	33.3333	33.3333	58.871	40	70.8333	70	60.9375	87.5	83.3333	85.4167	75	31.9444	81.25	46.1538		59.0517		BUKEDEA-Teso		31.1667		35.9375	32.5	35	37.5	37.5	36.3636	42.5	22.5	41.6667	37.5	31.3291	31.4394	41.9643	26.5625	21.5	28.125	50	5	21.875	12.5	15.625
86.0294	80	85	85	91.6667	83.9286	87.5	87.5	75	83.3333	85.0806	85	91.6667	85	87.5	83.3333	91.6667	87.5	93.75	67.6471	75	73		83.0435		KABERAMAIDO-Teso		79.0833		73.9583	80	80	70.8333	68.75	88.0682	92.5	82.5	89.5833	87.5	83.7025	79.9242	83.0357	87.8906	61.5	68.75	75	55	46.875	71.875	53.125
62.5	65	63.3333	70	55.5556	55.3571	50	62.5	33.3333	75	59.2742	70	66.6667	75	70.3125	66.6667	66.6667	66.6667	56.25	65.625	62.5	63.5417		62.5		KALAKI-Teso		65		66.6667	77.5	67.5	66.6667	59.375	75	100	55	83.3333	62.5	61.0759	60.6061	83.0357	51.9531	67	87.5	100	67.5	34.375	59.375	53.125
57.3529	55	58.3333	75	47.2222	67.8571	50	87.5	50	83.3333	62.0968	40	62.5	65	56.25	75	70.8333	72.9167	56.25	13.4615	75	33.3333		56.982		KAPELEBYONG-Teso		27.3333		28.6458	25	27.5	29.1667	31.25	28.9773	37.5	25	27.0833	27.0833	27.057	25	30.3571	27.7344	25.5	28.125	37.5	32.5	18.75	21.875	12.5
60.2941	65	65	45	58.3333	69.6429	56.25	62.5	83.3333	83.3333	64.5161	70	83.3333	90	81.25	87.5	91.6667	89.5833	68.75	71.875	100	76.0417		71.9298		KATAKWI-Teso		64.4167		62.5	50	75	62.5	62.5	72.1591	82.5	72.5	77.0833	58.3333	67.5633	65.9091	78.5714	64.4531	49.5	53.125	65.625	45	43.75	50	40.625
79.4118	65	78.3333	95	80.5556	78.5714	75	100	58.3333	75	79.0323	90	75	55	73.4375	100	75	87.5	81.25	79.1667	87.5	80.7692		79.5259		KUMI-Teso		68.1667		64.5833	60	75	79.1667	50	68.1818	75	60	66.6667	70.8333	70.7278	65.5303	70.5357	76.1719	63.5	68.75	100	65	37.5	59.375	50
58.0882	50	58.3333	75	52.7778	73.2143	68.75	93.75	41.6667	83.3333	64.9194	70	54.1667	65	62.5	66.6667	75	70.8333	62.5	85.2941	68.75	79		68.2609		NGORA-Teso		61.5		58.8542	65	60	45.8333	64.0625	71.0227	90	55	68.75	70.8333	61.8671	61.3636	74.1071	57.0312	54.5	75	100	47.5	28.125	40.625	37.5
55.8824	60	55	70	47.2222	69.6429	62.5	81.25	50	83.3333	62.0968	40	70.8333	60	57.8125	79.1667	75	77.0833	75	21.4286	68.75	39.7727		58.7054		SERERE-Teso		30.5		31.7708	30	32.5	35.4167	29.6875	32.9545	42.5	27.5	37.5	25	29.5886	26.8939	28.5714	32.8125	30	34.375	50	15	25	31.25	28.125
67.6471	55	73.3333	80	58.3333	82.1429	75	87.5	83.3333	83.3333	74.1935	90	75	75	79.6875	83.3333	75	79.1667	68.75	80.8824	75	78		76.3043		SOROTI CITY-Teso		74.3333		71.3542	77.5	77.5	72.9167	62.5	67.0455	87.5	60	70.8333	52.0833	79.2722	76.5152	83.0357	80.4688	68	75	100	75	37.5	56.25	62.5
																									BUNYANGABU-Tooro-Rwenzori		37.8333		26.0417	25	25	29.1667	25	43.75	55	72.5	25	29.1667	42.0886	40.9091	37.5	45.3125	30.5	59.375	25	25	25	25	25
76.4706	70	76.6667	70	83.3333	98.2143	100	100	91.6667	100	86.2903	85	75	70	76.5625	79.1667	75	77.0833	62.5	75	87.5	75		81.4103		FORT PORTAL CITY-Tooro-Rwenzori		69.4167		60.9375	45	87.5	50	62.5	89.7727	85	90	83.3333	100	71.8354	80.6818	91.9643	53.9062	52	62.5	100	55	25	25	43.75
67.6471	85	66.6667	70	58.3333	60.7143	81.25	56.25	50	50	64.5161	40	33.3333	40	37.5	75	62.5	68.75	56.25	66.6667	43.75	60.8696		60.3982		KABAROLE-Tooro-Rwenzori		76.0833		92.1875	87.5	100	79.1667	100	81.25	97.5	42.5	85.4167	95.8333	72.7848	78.7879	93.75	57.4219	66.5	100	96.875	47.5	50	37.5	71.875
33.0882	40	36.6667	30	25	57.1429	56.25	75	50	41.6667	43.9516	45	25	50	39.0625	54.1667	66.6667	60.4167	75	40	25	44.4444		45.1389		KASESE-Tooro-Rwenzori		31.75		25	25	25	25	25	39.7727	42.5	62.5	33.3333	25	33.7025	26.5152	28.5714	43.3594	25	25	25	25	25	25	25
																									KYENJOJO-Tooro-Rwenzori		27.8333		25	25	25	25	25	27.8409	25	37.5	25	25	29.5886	25	28.5714	34.7656	25	25	25	25	25	25	25
91.1765	100	80	100	100	83.9286	62.5	81.25	100	100	87.9032	25	70.8333	100	65.625	75	62.5	68.75	62.5	28.125	81.25	42.7083		73.2456		NTOROKO-Tooro-Rwenzori		34.0833		35.9375	30	30	33.3333	45.3125	46.0227	42.5	40	50	50	33.2278	28.4091	40.1786	35.1562	24.5	28.125	50	15	31.25	12.5	12.5
88.2353	100	75	95	100	83.9286	81.25	100	50	100	86.2903	85	95.8333	85	89.0625	87.5	87.5	87.5	75	67.6471	93.75	73		83.913		ADJUMANI-West Nile		82.6667		83.8542	75	95	89.5833	78.125	95.4545	100	100	87.5	95.8333	82.7532	86.3636	81.25	79.6875	70	65.625	100	55	93.75	43.75	65.625
65.4412	65	68.3333	70	58.3333	73.2143	68.75	75	75	75	68.9516	55	58.3333	55	56.25	62.5	83.3333	72.9167	50	60.9375	75	61.4583		66.0088		ARUA CITY-West Nile		60.5		63.5417	72.5	57.5	75	53.125	64.7727	70	75	66.6667	50	61.3924	58.3333	61.6071	64.4531	51	75	75	25	50	43.75	43.75
72.7941	65	68.3333	80	80.5556	75	75	81.25	58.3333	83.3333	73.7903	80	75	60	71.875	75	75	75	93.75	75	75	77.7778		74.5726		MOYO-West Nile		66.5		70.8333	55	70	83.3333	71.875	80.6818	85	95	75	70.8333	64.2405	55.303	60.7143	75	57	75	37.5	65	75	37.5	50
91.1765	70	100	90	88.8889	75	81.25	87.5	58.3333	66.6667	83.871	90	83.3333	70	81.25	83.3333	100	91.6667	81.25	75	93.75	78.8462		83.1897		NEBBI-West Nile		71.5		73.4375	85	75	66.6667	70.3125	78.9773	80	90	72.9167	75	70.4114	71.5909	80.3571	64.8438	66.5	75	87.5	50	87.5	40.625	62.5
63.2353	70	65	80	47.2222	73.2143	81.25	87.5	50	66.6667	67.7419	65	95.8333	85	82.8125	91.6667	87.5	89.5833	75	25	81.25	42		66.5217		OBONGI-West Nile		34.75		36.4583	30	40	29.1667	43.75	38.6364	40	35	37.5	41.6667	35.1266	31.4394	34.8214	39.0625	28.5	34.375	37.5	40	28.125	9.375	18.75
72.7941	85	78.3333	90	47.2222	78.5714	62.5	100	50	100	75.4032	60	75	50	62.5	75	50	62.5	100	25	68.75	44.7917		65.7895		PAKWACH-West Nile		35.3333		33.3333	32.5	35	29.1667	35.9375	38.0682	42.5	37.5	35.4167	37.5	37.6582	36.3636	33.0357	41.0156	27.5	37.5	31.25	12.5	21.875	28.125	37.5
50	55	51.6667	65	36.1111	51.7857	56.25	62.5	41.6667	41.6667	50.8065	70	50	80	65.625	95.8333	75	85.4167	93.75	39.5833	50	52.5		57.0455		TEREGO-West Nile		55.6667		52.0833	25	75	33.3333	68.75	56.8182	75	55	41.6667	58.3333	59.4937	56.0606	57.1429	64.0625	46	81.25	50	45	50	25	25
82.3529	90	81.6667	90	75	82.1429	93.75	68.75	91.6667	75	82.2581	100	75	80	84.375	66.6667	95.8333	81.25	93.75	71.6667	81.25	77.1739		81.4159		YUMBE-West Nile		69.5833		63.0208	40	75	68.75	65.625	73.8636	92.5	70	77.0833	58.3333	74.8418	62.1212	72.3214	89.0625	55.5	75	100	40	43.75	25	53.125
72.5034	67.907	72.6163	77.2093	72.2545	71.7193	69.3314	77.8343	64.6318	73.8372	72.1493	68.2558	76.938	69.6512	71.9477	75.9205	77.907	76.9138	81.032	54.9245	78.2703	62.8555		72		Grand Total		54.9431		51.7647	47.3824	54.9706	53.2843	51.3603	58.75	63.7059	57.8529	56.8627	57.2549	57.4926	53.2665	59.916	60.7904	46.5882	55.0368	60.6985	40.1471	46.9485	38.8603	39.4485
