# Supplementary material for: Validating Uganda's Subnational Health Systems Functionality Index for Universal Health Coverage Outcomes and Revealing Capacity Gaps in Access, Quality, Demand, and Resilience
Source: Research Square preprint supplement (doi:10.21203/rs.3.rs-5743811/v1), 2025-06-04
Supplement: Supplementary file 7 [file cd96ff8ba713ed91f3ae64b0.xlsx]

## Sheet: 3.F3CorADQ
	UHC-SCI	Func-R
ABIM	71.4286	82.0755		SUMMARY OUTPUT
ADJUMANI	81.25	81.1321
AGAGO	90.1786	84.1346		Regression Statistics
ALEBTONG	44.6429	58.7963		Multiple R	0.753247
AMUDAT	54.4643	55.2083		R Square	0.567381
AMURIA	76.7857	69.3396		Adjusted R Square	0.561834
AMURU	45.5357	66.0377		Standard Error	14.8356
ARUA CITY	61.6071	62.5		Observations	80
BUDUDA	93.75	81.6038
BUGIRI	74.1071	76.3889		ANOVA
BUGWERI	33.9286	50.9091			df	SS	MS	F	Significance F
BUKEDEA	41.9643	59.2593		Regression	1	22515.2	22515.2	102.297	7.61454e-16
BUKOMANSIMBI	32.1429	53.8462		Residual	78	17167.5	220.096
BULIISA	71.4286	77.2727		Total	79	39682.7
BUTALEJA	87.5	90.9091
BUTAMBALA	54.4643	68.3962			Coefficients	Standard Error	t Stat	P-value	Lower 95%	Upper 95%	Lower 95.0%	Upper 95.0%
BUTEBO	87.5	84.7222		Intercept	-39.7606	9.96491	-3.99006	0.000148067	-59.5992	-19.922	-59.5992	-19.922
BUYENDE	37.5	53.3654		Func-R	1.45595	0.143951	10.1142	7.61454e-16	1.16936	1.74253	1.16936	1.74253
FORT PORTAL CITY	91.9643	75.9091
GOMBA	25.8929	51.9608
GULU	44.6429	60.5769
GULU CITY	85.7143	84.7222		RESIDUAL OUTPUT
HOIMA	35.7143	54.2453
HOIMA CITY	88.3929	85		Observation	Predicted UHC-SCI	Residuals	Standard Residuals
IGANGA	80.3571	81.8182		1	79.7369	-8.30831	-0.563602
JINJA CITY	34.8214	69.7115		2	78.3633	2.88666	0.195819
JINJA D	77.6786	71.3636		3	82.7349	7.44369	0.50495
KABALE	88.3929	86.8182		4	45.8437	-1.2008	-0.0814571
KABAROLE	93.75	55.3922		5	40.6198	13.8445	0.939156
KABERAMAIDO	83.0357	80.6604		6	61.1942	15.5915	1.05767
KAGADI	75.8929	75.463		7	56.3868	-10.8511	-0.736094
KALAKI	83.0357	66.3462		8	51.236	10.3711	0.703534
KALANGALA	25.8929	56.8182		9	79.0501	14.6999	0.997181
KALIRO	42.8571	57.8704		10	71.4575	2.64962	0.17974
KALUNGU	49.1071	67.0213		11	34.3603	-0.431735	-0.0292871
KAMULI	67.8571	66.6667		12	46.5177	-4.55342	-0.308885
KANUNGU	86.6071	68.8679		13	38.6365	-6.49365	-0.440503
KAPELEBYONG	30.3571	50.5102		14	72.7443	-1.31577	-0.0892565
KASESE	28.5714	46.7391		15	92.5982	-5.09815	-0.345838
KATAKWI	78.5714	80.7692		16	59.8206	-5.35635	-0.363353
KIBAALE	37.5	52.2321		17	83.5904	3.9096	0.265211
KIKUUBE	29.4643	59.2593		18	37.9365	-0.436537	-0.0296129
KISORO	62.5	75		19	70.759	21.2053	1.43848
KOLE	42.8571	71.7593		20	35.8915	-9.99866	-0.678269
KUMI	70.5357	80.0926		21	48.4361	-3.79329	-0.257322
KWANIA	38.3929	60.1852		22	83.5904	2.12388	0.144076
KYOTERA	81.25	75		23	39.2176	-3.50334	-0.237652
LAMWO	43.75	70.283		24	83.9948	4.39802	0.298344
LIRA	83.0357	51.9231		25	79.3623	0.994865	0.0674876
LUUKA	32.1429	47.0588		26	61.7357	-26.9142	-1.82575
LWENGO	26.7857	51.8519		27	64.141	13.5375	0.918333
LYANTONDE	64.2857	83.6538		28	86.642	1.75085	0.118771
MANAFWA	98.2143	81.4815		29	40.8874	52.8626	3.58599
MASAKA CITY	29.4643	80.5556		30	77.6766	5.35914	0.363542
MASINDI	76.7857	77.2727		31	70.1094	5.78344	0.392325
MAYUGE	79.4643	64.8148		32	56.8358	26.1999	1.77729
MBALE	88.3929	85.1852		33	42.9636	-17.0708	-1.15801
MOROTO	67.8571	72.6852		34	44.4956	-1.63841	-0.111143
MOYO	60.7143	75.4545		35	57.8188	-8.71164	-0.590963
MPIGI	56.25	66.3462		36	57.3025	10.5547	0.715985
NABILATUK	39.2857	64.8148		37	60.5074	26.0997	1.7705
NAKAPIRIPIRIT	33.9286	57.2727		38	33.7795	-3.42241	-0.232162
NAMAYINGO	31.25	55.7692		39	28.2891	0.282361	0.0191542
NAMUTUMBA	37.5	65.2778		40	77.8351	0.736367	0.0499522
NEBBI	80.3571	82.4074		41	36.2866	1.2134	0.0823123
NGORA	74.1071	72.1698		42	46.5177	-17.0534	-1.15684
NTOROKO	40.1786	55.7692		43	69.4354	-6.93537	-0.470468
OBONGI	34.8214	65.0943		44	64.717	-21.8599	-1.48289
OTUKE	40.1786	67.5926		45	76.8499	-6.3142	-0.42833
OYAM	94.6429	86.7647		46	47.8658	-9.47294	-0.642606
PAKWACH	33.0357	54.3269		47	69.4354	11.8146	0.801457
RAKAI	62.5	66.6667		48	62.5677	-18.8177	-1.27652
RUBANDA	41.9643	54.1667		49	35.8366	47.1991	3.2018
RUKIGA	41.0714	62.037		50	28.7545	3.38833	0.229851
RUKUNGIRI	77.6786	69.8113		51	35.7329	-8.9472	-0.606942
SEMBABULE	57.1429	68.75		52	82.0349	-17.7492	-1.20403
SERERE	28.5714	54.5		53	78.8721	19.3422	1.3121
SOROTI CITY	83.0357	78.7736		54	77.524	-48.0597	-3.26018
TEREGO	57.1429	65.1042		55	72.7443	4.04137	0.274151
YUMBE	72.3214	80.3922		56	54.6063	24.858	1.68627
				57	84.2645	4.1284	0.280054
				58	66.0651	1.79202	0.121563
				59	70.0972	-9.38288	-0.636497
				60	56.8358	-0.585838	-0.0397409
				61	54.6063	-15.3206	-1.03929
				62	43.6254	-9.69685	-0.657795
				63	41.4364	-10.1864	-0.691005
				64	55.2803	-17.7803	-1.20615
				65	80.2202	0.136984	0.00929245
				66	65.3148	8.79237	0.596439
				67	41.4364	-1.25784	-0.0853266
				68	55.0133	-20.1918	-1.36973
				69	58.6506	-18.472	-1.25307
				70	86.5642	8.07871	0.548027
				71	39.3365	-6.30077	-0.427419
				72	57.3025	5.19751	0.352578
				73	39.1032	2.86112	0.194087
				74	50.562	-9.49057	-0.643802
				75	61.8809	15.7976	1.07165
				76	60.3357	-3.19285	-0.21659
				77	39.5885	-11.017	-0.747352
				78	74.9295	8.10621	0.549892
				79	55.0276	2.11529	0.143492
				80	77.2861	-4.96463	-0.336781
