# Supplementary material for: Validating Uganda's Subnational Health Systems Functionality Index for Universal Health Coverage Outcomes and Revealing Capacity Gaps in Access, Quality, Demand, and Resilience
Source: Research Square preprint supplement (doi:10.21203/rs.3.rs-5743811/v1), 2025-06-04
Supplement: Supplementary file 8 [file e78c08c2e067bb85bfbfcbdd.xlsx]

## Sheet: 15.F3CorDQR
		UHC Coverage minus service capacity	Func DQR
ABIM	ABIM	71.4286	80
ADJUMANI	ADJUMANI	81.25	86.9444			SUMMARY OUTPUT
AGAGO	AGAGO	90.1786	80.5556
ALEBTONG	ALEBTONG	44.6429	77.2222			Regression Statistics
AMUDAT	AMUDAT	54.4643	48.0556			Multiple R	0.416781
AMURIA	AMURIA	76.7857	68.3333			R Square	0.173707
AMURU	AMURU	45.5357	83.8889			Adjusted R Square	0.163113
ARUA CITY	ARUA CITY	61.6071	67.2222			Standard Error	20.5031
BUDUDA	BUDUDA	93.75	90			Observations	80
BUGIRI	BUGIRI	74.1071	73.6111
BUGWERI	BUGWERI	33.9286	61.3889			ANOVA
BUKEDEA	BUKEDEA	41.9643	62.7778				df	SS	MS	F	Significance F
BUKOMANSIMBI	BUKOMANSIMBI	32.1429	60.8333			Regression	1	6893.14	6893.14	16.3975	0.00012022
BULIISA	BULIISA	71.4286	79.1667			Residual	78	32789.5	420.379
BUTALEJA	BUTALEJA	87.5	93.8889			Total	79	39682.7
BUTAMBALA	BUTAMBALA	54.4643	61.6667
BUTEBO	BUTEBO	87.5	82.5				Coefficients	Standard Error	t Stat	P-value	Lower 95%	Upper 95%	Lower 95.0%	Upper 95.0%
BUYENDE	BUYENDE	37.5	60			Intercept	-4.73669	16.0576	-0.294981	0.768792	-36.7049	27.2315	-36.7049	27.2315
FORT PORTAL CITY	FORT PORTAL CITY	91.9643	83.3333			X Variable 1	0.890586	0.219932	4.04938	0.00012022	0.452736	1.32844	0.452736	1.32844
GOMBA	GOMBA	25.8929	55
GULU	GULU	44.6429	73.3333
GULU CITY	GULU CITY	85.7143	85.5556
HOIMA	HOIMA	35.7143	66.3889			RESIDUAL OUTPUT
HOIMA CITY	HOIMA CITY	88.3929	80.8333
IGANGA	IGANGA	80.3571	73.3333			Observation	Predicted Y	Residuals
JINJA CITY	JINJA CITY	34.8214	58.6111			1	66.5102	4.91836
JINJA DISTRICT	JINJA DISTRICT	77.6786	62.5			2	72.6948	8.55516
KABALE	KABALE	88.3929	87.5			3	67.005	23.1736
KABAROLE	KABAROLE	93.75	60.2778			4	64.0364	-19.3935
KABERAMAIDO	KABERAMAIDO	83.0357	85.8333			5	38.0609	16.4034
KAGADI	KAGADI	75.8929	78.8889			6	56.12	20.6657
KALAKI	KALAKI	83.0357	62.2222			7	69.9736	-24.4379
KALANGALA	KALANGALA	25.8929	69.1667			8	55.1305	6.47665
KALIRO	KALIRO	42.8571	60.2778			9	75.4161	18.3339
KALUNGU	KALUNGU	49.1071	60.5556			10	60.8204	13.2868
KAMULI	KAMULI	67.8571	66.3889			11	49.9354	-16.0068
KANUNGU	KANUNGU	86.6071	68.0556			12	51.1723	-9.20805
KAPELEBYONG	KAPELEBYONG	30.3571	62.5			13	49.4406	-17.2978
KASESE	KASESE	28.5714	45.2778			14	65.7681	5.66052
KATAKWI	KATAKWI	78.5714	70.8333			15	78.8795	8.62054
KIBAALE	KIBAALE	37.5	73.0556			16	50.1828	4.28149
KIKUUBE	KIKUUBE	29.4643	75.5556			17	68.7367	18.7633
KISORO	KISORO	62.5	79.7222			18	48.6985	-11.1985
KOLE	KOLE	42.8571	95.2778			19	69.4788	22.4855
KUMI	KUMI	70.5357	79.1667			20	44.2456	-18.3527
KWANIA	KWANIA	38.3929	75.5556			21	60.573	-15.9301
KYOTERA	KYOTERA	81.25	67.2222			22	71.4579	14.2564
LAMWO	LAMWO	43.75	80.2778			23	54.3883	-18.6741
LIRA	LIRA	83.0357	70			24	67.2524	21.1405
LUUKA	LUUKA	32.1429	63.6111			25	60.573	19.7842
LWENGO	LWENGO	26.7857	55.2778			26	47.4616	-12.6401
LYANTONDE	LYANTONDE	64.2857	83.3333			27	50.925	26.7536
MANAFWA	MANAFWA	98.2143	85.5556			28	73.1896	15.2033
MASAKA CITY	MASAKA CITY	29.4643	80			29	48.9459	44.8041
MASINDI	MASINDI	76.7857	80.2778			30	71.7053	11.3304
MAYUGE	MAYUGE	79.4643	58.3333			31	65.5207	10.3722
MBALE	MBALE	88.3929	85.2778			32	50.6776	32.3581
MOROTO	MOROTO	67.8571	63.8889			33	56.8622	-30.9693
MOYO	MOYO	60.7143	73.6111			34	48.9459	-6.08873
MPIGI	MPIGI	56.25	66.3889			35	49.1933	-0.0861128
NABILATUK	NABILATUK	39.2857	73.0556			36	54.3883	13.4688
NAKAPIRIPIRIT	NAKAPIRIPIRIT	33.9286	78.8889			37	55.8727	30.7345
NAMAYINGO	NAMAYINGO	31.25	69.7222			38	50.925	-20.5678
NAMUTUMBA	NAMUTUMBA	37.5	70.2778			39	35.5871	-7.01565
NEBBI	NEBBI	80.3571	84.4444			40	58.3465	20.2249
NGORA	NGORA	74.1071	65.2778			41	60.3256	-22.8256
NTOROKO	NTOROKO	40.1786	81.3889			42	62.552	-33.0878
OBONGI	OBONGI	34.8214	73.3333			43	66.2628	-3.76282
OTUKE	OTUKE	40.1786	80.2778			44	80.1164	-37.2592
OYAM	OYAM	94.6429	86.1111			45	65.7681	4.76766
PAKWACH	PAKWACH	33.0357	71.3889			46	62.552	-24.1592
RAKAI	RAKAI	62.5	62.7778			47	55.1305	26.1195
RUBANDA	RUBANDA	41.9643	71.9444			48	66.7576	-23.0076
RUKIGA	RUKIGA	41.0714	73.6111			49	57.6043	25.4314
RUKUNGIRI	RUKUNGIRI	77.6786	66.1111			50	51.9145	-19.7716
SERERE	SERERE	28.5714	63.3333			51	44.4929	-17.7072
SOROTI CITY	SOROTI CITY	83.0357	75.8333			52	69.4788	-5.19312
SEMBABULE	SEMBABULE	57.1429	66.6667			53	71.4579	26.7564
TEREGO	TEREGO	57.1429	58.0556			54	66.5102	-37.0459
YUMBE	YUMBE	72.3214	82.5			55	66.7576	10.0281
						56	47.2142	32.2501
						57	71.2105	17.1823
						58	52.1619	15.6953
						59	60.8204	-0.106068
						60	54.3883	1.86166
						61	60.3256	-21.0399
						62	65.5207	-31.5921
						63	57.357	-26.107
						64	57.8517	-20.3517
						65	70.4684	9.88877
						66	53.3988	20.7083
						67	67.7471	-27.5686
						68	60.573	-25.7515
						69	66.7576	-26.579
						70	71.9527	22.6902
						71	58.8413	-25.8056
						72	51.1723	11.3277
						73	59.336	-17.3718
						74	60.8204	-19.7489
						75	54.141	23.5376
						76	51.6671	-23.0957
						77	62.7994	20.2363
						78	54.6357	2.50713
						79	46.9668	10.1761
						80	68.7367	3.58475

## Sheet: 16.F3CorAQR
	UHC Coverage minus service capacity	Func AQR
ABIM	71.4286	79.6117
ADJUMANI	81.25	83.4951		SUMMARY OUTPUT
AGAGO	90.1786	81.1275
ALEBTONG	44.6429	69.2308		Regression Statistics
AMUDAT	54.4643	46.1735		Multiple R	0.603439
AMURIA	76.7857	67.233		R Square	0.364139
AMURU	45.5357	75.9709		Adjusted R Square	0.355987
ARUA CITY	61.6071	65.1961		Standard Error	17.986
BUDUDA	93.75	86.8932		Observations	80
BUGIRI	74.1071	72.8365
BUGWERI	33.9286	54.0476		ANOVA
BUKEDEA	41.9643	56.0096			df	SS	MS	F	Significance F
BUKOMANSIMBI	32.1429	56.3725		Regression	1	14450	14450	44.6683	3.13312e-09
BULIISA	71.4286	79.2857		Residual	78	25232.7	323.496
BUTALEJA	87.5	91.9048		Total	79	39682.7
BUTAMBALA	54.4643	62.6214
BUTEBO	87.5	81.25			Coefficients	Standard Error	t Stat	P-value	Lower 95%	Upper 95%	Lower 95.0%	Upper 95.0%
BUYENDE	37.5	53.4314		Intercept	-27.6192	13.2071	-2.09124	0.0397621	-53.9126	-1.32586	-53.9126	-1.32586
FORT PORTAL CITY	91.9643	81.9048		X Variable 1	1.25992	0.188514	6.68343	3.13312e-09	0.884616	1.63522	0.884616	1.63522
GOMBA	25.8929	50.7426
GULU	44.6429	67.8922
GULU CITY	85.7143	85.8173
HOIMA	35.7143	61.6505		RESIDUAL OUTPUT
HOIMA CITY	88.3929	83.8095
IGANGA	80.3571	75.2381		Observation	Predicted Y	Residuals
JINJA CITY	34.8214	61.0294		1	72.6849	-1.25631
JINJA DISTRICT	77.6786	64.2857		2	77.5778	3.67224
KABALE	88.3929	84.5238		3	74.5947	15.5839
KABAROLE	93.75	59.4059		4	59.6058	-14.963
KABERAMAIDO	83.0357	82.5243		5	30.5555	23.9088
KAGADI	75.8929	78.125		6	57.0888	19.6969
KALAKI	83.0357	62.0098		7	68.0978	-22.5621
KALANGALA	25.8929	62.1429		8	54.5224	7.0847
KALIRO	42.8571	58.1731		9	81.859	11.891
KALUNGU	49.1071	62.3711		10	64.1488	9.95835
KAMULI	67.8571	67.5481		11	40.4763	-6.54774
KANUNGU	86.6071	71.3592		12	42.9483	-0.983977
KAPELEBYONG	30.3571	55.0505		13	43.4055	-11.2627
KASESE	28.5714	43.2292		14	72.2742	-0.845652
KATAKWI	78.5714	69.8529		15	88.1732	-0.673181
KIBAALE	37.5	63.9151		16	51.2785	3.18577
KIKUUBE	29.4643	66.8269		17	74.7491	12.7509
KISORO	62.5	76.5		18	39.6999	-2.19989
KOLE	42.8571	84.1346		19	75.574	16.3903
KUMI	70.5357	78.6058		20	36.3122	-10.4194
KWANIA	38.3929	68.0288		21	57.9193	-13.2764
KYOTERA	81.25	67.5481		22	80.5035	5.21079
LAMWO	43.75	72.0874		23	50.0553	-14.341
LIRA	83.0357	63.7255		24	77.9739	10.419
LUUKA	32.1429	54.9505		25	67.1746	13.1826
LWENGO	26.7857	51.9231		26	49.2728	-14.4514
LYANTONDE	64.2857	79.6569		27	53.3755	24.3031
MANAFWA	98.2143	84.6154		28	78.8738	9.51907
MASAKA CITY	29.4643	77.8846		29	47.2274	46.5226
MASINDI	76.7857	80		30	76.3545	6.68118
MAYUGE	79.4643	58.8942		31	70.8118	5.08104
MBALE	88.3929	83.8942		32	50.508	32.5277
MOROTO	67.8571	66.8269		33	50.6756	-24.7828
MOYO	60.7143	74.5238		34	45.674	-2.8169
MPIGI	56.25	65.4412		35	50.9633	-1.85611
NABILATUK	39.2857	65.625		36	57.4858	10.3714
NAKAPIRIPIRIT	33.9286	68.0952		37	62.2875	24.3196
NAMAYINGO	31.25	62.7451		38	41.7399	-11.3827
NAMUTUMBA	37.5	64.6635		39	26.846	1.72547
NEBBI	80.3571	82.2115		40	60.3897	18.1817
NGORA	74.1071	67.9612		41	52.9085	-15.4085
NTOROKO	40.1786	73.7745		42	56.5772	-27.1129
OBONGI	34.8214	63.835		43	68.7645	-6.26445
OTUKE	40.1786	71.6346		44	78.3834	-35.5263
OYAM	94.6429	87.1287		45	71.4175	-0.881835
PAKWACH	33.0357	66.1765		46	58.0915	-19.6986
RAKAI	62.5	66.1058		47	57.4858	23.7642
RUBANDA	41.9643	62.0192		48	63.2049	-19.4549
RUKIGA	41.0714	63.4615		49	52.6696	30.3661
RUKUNGIRI	77.6786	67.7184		50	41.6139	-9.471
SERERE	28.5714	67.402		51	37.7996	-11.0138
SOROTI CITY	83.0357	56.5		52	72.7418	-8.45613
SEMBABULE	57.1429	75.9709		53	78.9892	19.2251
TEREGO	57.1429	53.5714		54	70.509	-41.0447
YUMBE	72.3214	81.4356		55	73.1742	3.61155
				56	46.5826	32.8816
				57	78.0806	10.3123
				58	56.5772	11.28
				59	66.2746	-5.56033
				60	54.8313	1.41875
				61	55.0629	-15.7771
				62	58.1751	-24.2466
				63	51.4344	-20.1844
				64	53.8514	-16.3514
				65	75.9605	4.39662
				66	58.0062	16.1009
				67	65.3306	-25.152
				68	52.8075	-17.9861
				69	62.6345	-22.4559
				70	82.1558	12.4871
				71	55.7577	-22.7219
				72	55.6686	6.83142
				73	50.5199	-8.5556
				74	52.3371	-11.2656
				75	57.7004	19.9781
				76	57.3017	-28.7302
				77	43.5661	39.4696
				78	68.0978	-10.9549
				79	39.8763	17.2665
				80	74.983	-2.66153

## Sheet: 17.F3CorADR
	UHC Coverage minus service capacity	FuncADR
ABIM	71.4286	82.3232
ADJUMANI	81.25	83.0808		SUMMARY OUTPUT
AGAGO	90.1786	78.5714
ALEBTONG	44.6429	70.5		Regression Statistics
AMUDAT	54.4643	50.7979		Multiple R	0.606148
AMURIA	76.7857	69.4444		R Square	0.367415
AMURU	45.5357	75.2525		Adjusted R Square	0.359305
ARUA CITY	61.6071	67.602		Standard Error	17.9396
BUDUDA	93.75	87.1212		Observations	80
BUGIRI	74.1071	73.25
BUGWERI	33.9286	57.4257		ANOVA
BUKEDEA	41.9643	58.75			df	SS	MS	F	Significance F
BUKOMANSIMBI	32.1429	55.102		Regression	1	14580	14580	45.3036	2.55067e-09
BULIISA	71.4286	78.9604		Residual	78	25102.7	321.829
BUTALEJA	87.5	91.3366		Total	79	39682.7
BUTAMBALA	54.4643	61.8687
BUTEBO	87.5	82.75			Coefficients	Standard Error	t Stat	P-value	Lower 95%	Upper 95%	Lower 95.0%	Upper 95.0%
BUYENDE	37.5	52.2959		Intercept	-31.2849	13.654	-2.29126	0.0246479	-58.4679	-4.10184	-58.4679	-4.10184
FORT PORTAL CITY	91.9643	82.1782		X Variable 1	1.30349	0.193661	6.7308	2.55067e-09	0.917945	1.68904	0.917945	1.68904
GOMBA	25.8929	52.0619
GULU	44.6429	66.3265
GULU CITY	85.7143	84.25
HOIMA	35.7143	63.1313		RESIDUAL OUTPUT
HOIMA CITY	88.3929	84.1584
IGANGA	80.3571	74.7525		Observation	Predicted Y	Residuals
JINJA CITY	34.8214	57.6531		1	76.023	-4.59443
JINJA DISTRICT	77.6786	63.6139		2	77.0105	4.23951
KABALE	88.3929	84.6535		3	71.1325	19.046
KABAROLE	93.75	64.1753		4	60.6115	-15.9686
KABERAMAIDO	83.0357	82.3232		5	34.9299	19.5344
KAGADI	75.8929	79.25		6	59.2356	17.5501
KALAKI	83.0357	61.2245		7	66.8064	-21.2707
KALANGALA	25.8929	61.1386		8	56.834	4.77314
KALIRO	42.8571	60.25		9	82.2771	11.4729
KALUNGU	49.1071	61.828		10	64.1961	9.91105
KAMULI	67.8571	68.75		11	43.5693	-9.64068
KANUNGU	86.6071	70.202		12	45.2954	-3.33113
KAPELEBYONG	30.3571	57.1053		13	40.5403	-8.39746
KASESE	28.5714	46.1957		14	71.6396	-0.210987
KATAKWI	78.5714	70.4082		15	87.7719	-0.271918
KIBAALE	37.5	66.1765		16	49.3606	5.10368
KIKUUBE	29.4643	69.75		17	76.5793	10.9207
KISORO	62.5	79.1667		18	36.8826	0.617445
KOLE	42.8571	84.25		19	75.834	16.1303
KUMI	70.5357	80.5		20	36.5775	-10.6846
KWANIA	38.3929	67.25		21	55.1714	-10.5285
KYOTERA	81.25	68		22	78.5345	7.17976
LAMWO	43.75	71.2121		23	51.0064	-15.2921
LIRA	83.0357	62.2449		24	78.4151	9.97771
LUUKA	32.1429	56.9588		25	66.1546	14.2026
LWENGO	26.7857	50.5		26	43.8656	-9.04413
LYANTONDE	64.2857	80.102		27	51.6354	26.0431
MANAFWA	98.2143	84.25		28	79.0604	9.33241
MASAKA CITY	29.4643	79.5		29	52.3672	41.3828
MASINDI	76.7857	80.9406		30	76.023	7.01272
MAYUGE	79.4643	59		31	72.0171	3.8758
MBALE	88.3929	84		32	48.5209	34.5148
MOROTO	67.8571	64.75		33	48.409	-22.5161
MOYO	60.7143	75		34	47.2507	-4.39351
MPIGI	56.25	66.0714		35	49.3075	-0.200373
NABILATUK	39.2857	65		36	58.3304	9.52678
NAKAPIRIPIRIT	33.9286	69.0594		37	60.2231	26.3841
NAMAYINGO	31.25	63.7755		38	43.1515	-12.7944
NAMUTUMBA	37.5	63		39	28.9309	-0.359462
NEBBI	80.3571	83.5		40	60.4918	18.0797
NGORA	74.1071	69.1919		41	54.9758	-17.4758
NTOROKO	40.1786	74.4898		42	59.6339	-30.1696
OBONGI	34.8214	63.8889		43	71.9084	-9.40843
OTUKE	40.1786	72.5		44	78.5345	-35.6774
OYAM	94.6429	87.6289		45	73.6464	-3.11071
PAKWACH	33.0357	66.3265		46	56.3751	-17.9823
RAKAI	62.5	64.5		47	57.3527	23.8973
RUBANDA	41.9643	63.5		48	61.5397	-17.7897
RUKIGA	41.0714	66		49	49.851	33.1847
RUKUNGIRI	77.6786	66.9192		50	42.9605	-10.8177
SERERE	28.5714	67.0918		51	34.5416	-7.75587
SOROTI CITY	83.0357	58.8542		52	73.1277	-8.84197
SEMBABULE	57.1429	75.7576		53	78.5345	19.6798
TEREGO	57.1429	55.5851		54	72.3429	-42.8786
YUMBE	72.3214	80.9278		55	74.2207	2.56498
				56	45.6213	33.843
				57	78.2087	10.1842
				58	53.1164	14.7408
				59	66.4772	-5.76292
				60	54.8389	1.41114
				61	53.4423	-14.1565
				62	58.7337	-24.8051
				63	51.8461	-20.5961
				64	50.8353	-13.3353
				65	77.5569	2.80023
				66	58.9064	15.2007
				67	65.8122	-25.6336
				68	51.9939	-17.1725
				69	63.2185	-23.0399
				70	82.9389	11.704
				71	55.1714	-22.1357
				72	52.7905	9.70949
				73	51.487	-9.52273
				74	54.7458	-13.6743
				75	55.9439	21.7347
				76	56.169	-27.5975
				77	45.4312	37.6045
				78	67.4647	-10.3218
				79	41.17	15.9729
				80	74.2041	-1.88268
