# Supplementary material for: Validating Uganda's Subnational Health Systems Functionality Index for Universal Health Coverage Outcomes and Revealing Capacity Gaps in Access, Quality, Demand, and Resilience
Source: Research Square preprint supplement (doi:10.21203/rs.3.rs-5743811/v1), 2025-06-04
Supplement: Supplementary file 9 [file eb217acf7795de5aab0c2d79.xlsx]

## Sheet: 7.4Func-InherentResTransUHC
Resilience Transformation Capacity	Quality Overall	Demand Overall	Access Overall	Functionality Overall	SNUs (Districts)- Region	Coverage of Essential Services			SNUs (Districts)- Region	UHC-SCI	4FuncInhResTrans
81	94	77	81	83.25	AGAGO-Acholi	90			GOMBA-South Buganda	26	52.75			SUMMARY OUTPUT
97	83	79	49	77	AMURU-Acholi	46			KALANGALA- South Buganda	26	63.25
81	77	67	47	68	GULU-Acholi	45			LWENGO- South Buganda	27	55			Regression Statistics
75	91	79	84	82.25	GULU C-Acholi	86			KASESE-Tooro	29	42			Multiple R	0.650473
100	97	100	79	94	KITGUM - Acholi				MASAKA D- South Buganda	29	54.75			R Square	0.423115
83	89	88	50	77.5	LAMWO-Acholi	44			SERERE-Teso	29	55.5			Adjusted R Square	0.415719
100	70	85	88	85.75	NWOYA- Acholi				KIKUUBE-Bunyoro	29	71.25			Standard Error	17.1229
75	67	98	44	71	OMORO- Acholi				KAPELEBYONG-Teso	30	52.25			Observations	80
100	86	88	76	87.5	BUDUDA-Bugisu Elgon	94			NAMAYINGO-Busoga	31	63.5
100	84	81	80	86.25	MANAFWA- Bugisu Elgon	98			LUUKA-Busoga	32	55.5			ANOVA
89	88	90	82	87.25	MBALE D - Bugisu Elgon	88			BUKOMANSIMBI-South Buganda	32	56.25				df	SS	MS	F	Significance F
75	64	67	81	71.75	MBALE C- Bugisu Elgon				PAKWACH-West Nil	33	54.5			Regression	1	16773.2	16773.2	57.2088	6.55609e-11
94	97	94	86	92.75	BUTALEJA-Bukedi	88			BUGWERI-Busoga	34	59.75			Residual	78	22869	293.192
89	81	94	83	86.75	BUTEBO-Bukedi	88			NAKAPIRIPIRIT-Karamoja	34	66.5			Total	79	39642.2
81	78	75	78	78	BULIISA-Bunyoro	71			OBONGI-West Nile	35	65.5
72	56	67	47	60.5	HOIMA D-Bunyoro	36			JINJA CITY-Busoga	35	69				Coefficients	Standard Error	t Stat	P-value	Lower 95%	Upper 95%	Lower 95.0%	Upper 95.0%
61	78	79	92	77.5	HOIMA C-Bunyoro	88			HOIMA D-Bunyoro	36	60.5			Intercept	-32.6838	12.3568	-2.64501	0.00987437	-57.2842	-8.08337	-57.2842	-8.08337
83	72	79	76	77.5	KAGADI-Bunyoro	76			BUYENDE-Busoga	38	57			4FuncInhResTrans	1.31512	0.173874	7.56365	6.55609e-11	0.968965	1.66128	0.968965	1.66128
72	58	75	39	61	KIBAALE-Bunyoro	38			KIBAALE-Bunyoro	38	61
92	63	85	45	71.25	KIKUUBE-Bunyoro	29			KWANIA-Lango	38	67.25
97	73	79	79	82	MASINDI-Bunyoro	77			NAMUTUMBA-Busoga	38	70.75
78	77	81	74	77.5	BUGIRI-Busoga	74			NABILATUK-Karamoja	39	69.5			RESIDUAL OUTPUT
72	50	77	40	59.75	BUGWERI-Busoga	34			NTOROKO-Tooro	40	69.5
56	70	67	35	57	BUYENDE-Busoga	38			OTUKE-Lango	40	75.25			Observation	Predicted UHC-SCI	Residuals
75	81	79	83	79.5	IGANGA-Busoga	80			RUKIGA-Kigezi	41	66			1	36.6888	-10.6888
69	80	58	69	69	JINJA CITY-Busoga	35			RUBANDA-Kigezi	42	64.75			2	50.4976	-24.4976
75	72	69	72	72	JINJA D-Busoga	78			BUKEDEA-Teso	42	66.75			3	39.6478	-12.6478
56	53	69	56	58.5	KALIRO-Busoga	43			KALIRO-Busoga	43	58.5			4	22.5513	6.44873
69	59	67	71	66.5	KAMULI-Busoga	68			KOLE-Lango	43	83.75			5	39.3191	-10.3191
67	55	71	29	55.5	LUUKA-Busoga	32			LAMWO-Acholi	44	77.5			6	40.3054	-11.3054
56	64	67	64	62.75	MAYUGE-Busoga	79			GULU-Acholi	45	68			7	61.0185	-32.0185
75	64	73	42	63.5	NAMAYINGO-Busoga	31			ALEBTONG-Lango	45	68.75			8	36.0313	-6.03126
75	83	75	50	70.75	NAMUTUMBA-Busoga	38			AMURU-Acholi	46	77			9	50.8264	-19.8264
92	72	92	84	85	ABIM-Karamoja	71			KALUNGU- South Buganda	49	62.5			10	40.3054	-8.3054
36	41	75	55	51.75	AMUDAT-Karamoja	54			AMUDAT-Karamoja	54	51.75			11	41.2917	-9.29174
50	77	63	75	66.25	MOROTO-Karamoja	68			BUTAMBALA-South Buganda	54	69.25			12	38.9903	-5.99028
69	81	81	47	69.5	NABILATUK-Karamoja	39			MPIGI- South Buganda	56	64.5			13	45.8947	-11.8947
75	72	81	38	66.5	NAKAPIRIPIRIT-Karamoja	34			TEREGO-West Nile	57	60			14	54.7717	-20.7717
					NAPAK-Karamoja	83			SEMBABULE-S South Buganda	57	69.5			15	53.4566	-18.4566
86	92	96	80	88.5	KABALE-Kigezi	88			MOYO-West Nile	61	76.5			16	58.0595	-23.0595
53	67	56	76	63	KANUNGU-Kigezi	87			ARUA CITY-West Nile	62	62			17	46.881	-10.881
78	70	90	70	77	KISORO-Kigezi	63			RAKAI- South Buganda	63	67			18	42.2781	-4.27808
78	66	79	36	64.75	RUBANDA-Kigezi	42			KISORO-Kigezi	63	77			19	47.5386	-9.53856
58	70	94	42	66	RUKIGA-Kigezi	41			LYANTONDE- South Buganda	64	86.25			20	55.7581	-17.7581
61	70	65	72	67	RUKUNGIRI-Kigezi	78			MOROTO-Karamoja	68	66.25			21	60.361	-22.361
86	67	77	45	68.75	ALEBTONG-Lango	45			KAMULI-Busoga	68	66.5			22	58.7171	-19.7171
86	83	75	87	82.75	AMOLATAR-Lango				BULIISA-Bunyoro	71	78			23	58.7171	-18.7171
100	91	94	50	83.75	KOLE-Lango	43			KUMI-Teso	71	80.75			24	66.279	-26.279
75	77	73	44	67.25	KWANIA-Lango	38			ABIM-Karamoja	71	85			25	54.1142	-13.1142
81	69	58	38	61.5	LIRA-Lango	83			YUMBE-West Nile	72	79.25			26	52.4703	-10.4703
81	80	90	50	75.25	OTUKE-Lango	40			NGORA-Teso	74	66.5			27	55.1005	-13.1005
97	83	85	90	88.75	OYAM-Lango	95			BUGIRI-Busoga	74	77.5			28	44.2508	-1.25076
					BUIKWE-North Buganda	88			KAGADI-Bunyoro	76	77.5			29	77.4576	-34.4576
					KIBOGA-North Buganda	87			AMURIA-Teso	77	64.5			30	69.2381	-25.2381
56	67	60	42	56.25	BUKOMANSIMBI-South Buganda	32			MASINDI-Bunyoro	77	82			31	56.7444	-11.7444
72	70	67	68	69.25	BUTAMBALA-South Buganda	54			RUKUNGIRI-Kigezi	78	67			32	57.7307	-12.7307
47	55	67	42	52.75	GOMBA-South Buganda	26			JINJA D-Busoga	78	72			33	68.5805	-22.5805
69	73	69	42	63.25	KALANGALA- South Buganda	26			MAYUGE-Busoga	79	62.75			34	49.5112	-0.511242
50	66	63	71	62.5	KALUNGU- South Buganda	49			KATAKWI-Teso	79	76.25			35	35.3737	18.6263
72	73	79	74	74.5	KYOTERA- South Buganda	81			IGANGA-Busoga	80	79.5			36	58.3883	-4.38831
58	64	56	42	55	LWENGO- South Buganda	27			NEBBI-West Nile	80	85.25			37	52.1415	3.85852
86	89	96	74	86.25	LYANTONDE- South Buganda	64			KYOTERA- South Buganda	81	74.5			38	46.2234	10.7766
53	66	58	42	54.75	MASAKA D- South Buganda	29			ADJUMANI-West Nile	81	87.5			39	58.7171	-1.71709
72	78	92	77	79.75	MASAKA C- South Buganda				LIRA-Lango	83	61.5			40	67.9229	-6.92293
56	66	71	65	64.5	MPIGI- South Buganda	56			KALAKI-Teso	83	64.25			41	48.8537	13.1463
75	67	54	72	67	RAKAI- South Buganda	63			SOROTI CITY-Teso	83	73.75			42	55.4293	7.57072
72	69	67	70	69.5	SEMBABULE-S South Buganda	57			KABERAMAIDO-Teso	83	85.25			43	68.5805	-5.58049
47	63	79	69	64.5	AMURIA-Teso	77			GULU C-Acholi	86	82.25			44	80.7454	-16.7454
75	61	85	46	66.75	BUKEDEA-Teso	42			KANUNGU-Kigezi	87	63			45	54.4429	13.5571
92	88	88	73	85.25	KABERAMAIDO-Teso	83			HOIMA C-Bunyoro	88	77.5			46	54.7717	13.2283
56	70	67	64	64.25	KALAKI-Teso	83			BUTEBO-Bukedi	88	86.75			47	69.8956	1.10439
47	56	73	33	52.25	KAPELEBYONG-Teso	30			MBALE D - Bugisu Elgon	88	87.25			48	73.5122	-2.51219
58	81	90	76	76.25	KATAKWI-Teso	79			KABALE-Kigezi	88	88.5			49	79.1015	-8.10146
81	73	88	81	80.75	KUMI-Teso	71			BUTALEJA-Bukedi	88	92.75			50	71.5395	0.460488
53	63	71	79	66.5	NGORA-Teso	74			AGAGO-Acholi	90	83.25			51	54.7717	19.2283
47	58	77	40	55.5	SERERE-Teso	29			FORT PORTAL C- Tooro	92	78			52	69.2381	4.76195
58	80	79	78	73.75	SOROTI CITY-Teso	83			KABAROLE- Tooro	94	56.5			53	69.2381	6.76195
					BUNYANGABU-Tooro	38			BUDUDA-Bugisu Elgon	94	87.5			54	52.1415	24.8585
83	77	77	75	78	FORT PORTAL C- Tooro	92			OYAM-Lango	95	88.75			55	75.1561	1.84391
58	38	69	61	56.5	KABAROLE- Tooro	94			MANAFWA- Bugisu Elgon	98	86.25			56	55.4293	22.5707
25	39	60	44	42	KASESE-Tooro	29								57	62.0049	15.9951
					KYENJOJO-Tooro	29								58	49.84	29.16
100	66	69	43	69.5	NTOROKO-Tooro	40								59	67.5942	11.4058
100	89	88	73	87.5	ADJUMANI-West Nile	81								60	71.8683	8.13171
58	56	73	61	62	ARUA CITY-West Nile	62								61	79.4302	0.569764
81	72	75	78	76.5	MOYO-West Nile	61								62	65.2927	15.7073
89	81	92	79	85.25	NEBBI-West Nile	80								63	82.3893	-1.38926
47	83	90	42	65.5	OBONGI-West Nile	35								64	48.1961	34.8039
47	63	63	45	54.5	PAKWACH-West Nil	33								65	51.8127	31.1873
36	66	85	53	60	TEREGO-West Nile	57								66	64.3063	18.6937
75	84	81	77	79.25	YUMBE-West Nile	72								67	79.4302	3.56976
72	72	77	63	71	Grand Total	60								68	75.4849	10.5151
														69	50.1688	36.8312
														70	69.2381	18.7619
														71	81.4029	6.59708
														72	82.0605	5.93952
														73	83.7044	4.29562
														74	89.2936	-1.29364
														75	76.8	13.2
														76	69.8956	22.1044
														77	41.6205	52.3795
														78	82.3893	11.6107
														79	84.0332	10.9668
														80	80.7454	17.2546

## Sheet: 8.4Func-InherentResMobUHC
Mobilization Capacity	Quality Overall	Demand Overall	Access Overall	Functionality Overall	SNUs (Districts)- Region	Coverage of Essential Services		SNUs (Districts)- Region	UHC-SCI	Funct ADQInResMob
75	94	77	81	81.75	AGAGO-Acholi	90		GOMBA-South Buganda	26	53.5		SUMMARY OUTPUT
85	83	79	49	74	AMURU-Acholi	46		KALANGALA- South Buganda	26	62.25
75	77	67	47	66.5	GULU-Acholi	45		LWENGO- South Buganda	27	50.5		Regression Statistics
80	91	79	84	83.5	GULU C-Acholi	86		KASESE-Tooro	29	43.25		Multiple R	0.656477
85	97	100	79	90.25	KITGUM - Acholi			MASAKA D- South Buganda	29	56.5		R Square	0.430962
70	89	88	50	74.25	LAMWO-Acholi	44		SERERE-Teso	29	61.25		Adjusted R Square	0.423667
95	70	85	88	84.5	NWOYA- Acholi			KIKUUBE-Bunyoro	29	67		Standard Error	17.006
70	67	98	44	69.75	OMORO- Acholi			KAPELEBYONG-Teso	30	59.25		Observations	80
100	86	88	76	87.5	BUDUDA-Bugisu Elgon	94		NAMAYINGO-Busoga	31	64.75
85	84	81	80	82.5	MANAFWA- Bugisu Elgon	98		LUUKA-Busoga	32	56.25		ANOVA
95	88	90	82	88.75	MBALE D - Bugisu Elgon	88		BUKOMANSIMBI-South Buganda	32	58.5			df	SS	MS	F	Significance F
75	64	67	81	71.75	MBALE C- Bugisu Elgon			PAKWACH-West Nil	33	65.25		Regression	1	17084.3	17084.3	59.0734	3.80972e-11
100	97	94	86	94.25	BUTALEJA-Bukedi	88		BUGWERI-Busoga	34	61.75		Residual	78	22557.9	289.204
95	81	94	83	88.25	BUTEBO-Bukedi	88		NAKAPIRIPIRIT-Karamoja	34	69		Total	79	39642.2
85	78	75	78	79	BULIISA-Bunyoro	71		JINJA CITY-Busoga	35	69.25
90	56	67	47	65	HOIMA D-Bunyoro	36		OBONGI-West Nile	35	73.75			Coefficients	Standard Error	t Stat	P-value	Lower 95%	Upper 95%	Lower 95.0%	Upper 95.0%
85	78	79	92	83.5	HOIMA C-Bunyoro	88		HOIMA D-Bunyoro	36	65		Intercept	-41.5617	13.305	-3.12376	0.00250638	-68.0499	-15.0735	-68.0499	-15.0735
85	72	79	76	78	KAGADI-Bunyoro	76		BUYENDE-Busoga	38	61.75		Funct ADQInResMob	1.41295	0.183837	7.68592	3.80972e-11	1.04696	1.77894	1.04696	1.77894
100	58	75	39	68	KIBAALE-Bunyoro	38		KWANIA-Lango	38	67.25
75	63	85	45	67	KIKUUBE-Bunyoro	29		KIBAALE-Bunyoro	38	68
90	73	79	79	80.25	MASINDI-Bunyoro	77		NAMUTUMBA-Busoga	38	69.5
90	77	81	74	80.5	BUGIRI-Busoga	74		NABILATUK-Karamoja	39	68.5		RESIDUAL OUTPUT
80	50	77	40	61.75	BUGWERI-Busoga	34		NTOROKO-Tooro	40	69.5
75	70	67	35	61.75	BUYENDE-Busoga	38		OTUKE-Lango	40	77.5		Observation	Predicted UHC-SCI	Residuals
75	81	79	83	79.5	IGANGA-Busoga	80		RUKIGA-Kigezi	41	71.5		1	34.0314	-8.03137
70	80	58	69	69.25	JINJA CITY-Busoga	35		RUBANDA-Kigezi	42	66.5		2	46.3947	-20.3947
65	72	69	72	69.5	JINJA D-Busoga	78		BUKEDEA-Teso	42	66.75		3	29.7925	-2.79251
75	53	69	56	63.25	KALIRO-Busoga	43		KALIRO-Busoga	43	63.25		4	19.5486	9.45141
70	59	67	71	66.75	KAMULI-Busoga	68		KOLE-Lango	43	83.75		5	38.2702	-9.27024
70	55	71	29	56.25	LUUKA-Busoga	32		LAMWO-Acholi	44	74.25		6	44.9818	-15.9818
60	64	67	64	63.75	MAYUGE-Busoga	79		GULU-Acholi	45	66.5		7	53.1063	-24.1063
80	64	73	42	64.75	NAMAYINGO-Busoga	31		ALEBTONG-Lango	45	68.5		8	42.1559	-12.1559
70	83	75	50	69.5	NAMUTUMBA-Busoga	38		AMURU-Acholi	46	74		9	49.9271	-18.9271
90	72	92	84	84.5	ABIM-Karamoja	71		KALUNGU- South Buganda	49	66.25		10	37.917	-5.917
40	41	75	55	52.75	AMUDAT-Karamoja	54		AMUDAT-Karamoja	54	52.75		11	41.0961	-9.09614
70	77	63	75	71.25	MOROTO-Karamoja	68		BUTAMBALA-South Buganda	54	62.5		12	50.6336	-17.6336
65	81	81	47	68.5	NABILATUK-Karamoja	39		MPIGI- South Buganda	56	68		13	45.6882	-11.6882
85	72	81	38	69	NAKAPIRIPIRIT-Karamoja	34		TEREGO-West Nile	57	67.25		14	55.9322	-21.9322
					NAPAK-Karamoja	83		SEMBABULE-S South Buganda	57	69		15	56.2854	-21.2854
90	92	96	80	89.5	KABALE-Kigezi	88		MOYO-West Nile	61	76.25		16	62.6437	-27.6437
60	67	56	76	64.75	KANUNGU-Kigezi	87		ARUA CITY-West Nile	62	65		17	50.2803	-14.2803
90	70	90	70	80	KISORO-Kigezi	63		RAKAI- South Buganda	63	65.75		18	45.6882	-7.68825
85	66	79	36	66.5	RUBANDA-Kigezi	42		KISORO-Kigezi	63	80		19	53.4595	-15.4595
80	70	94	42	71.5	RUKIGA-Kigezi	41		LYANTONDE- South Buganda	64	89.75		20	54.5192	-16.5192
60	70	65	72	66.75	RUKUNGIRI-Kigezi	78		KAMULI-Busoga	68	66.75		21	56.6386	-18.6386
85	67	77	45	68.5	ALEBTONG-Lango	45		MOROTO-Karamoja	68	71.25		22	55.2257	-16.2257
80	83	75	87	81.25	AMOLATAR-Lango			BULIISA-Bunyoro	71	79		23	56.6386	-16.6386
100	91	94	50	83.75	KOLE-Lango	43		KUMI-Teso	71	84.25		24	67.9423	-27.9423
75	77	73	44	67.25	KWANIA-Lango	38		ABIM-Karamoja	71	84.5		25	59.4645	-18.4645
90	69	58	38	63.75	LIRA-Lango	83		YUMBE-West Nile	72	83		26	52.3998	-10.3998
90	80	90	50	77.5	OTUKE-Lango	40		NGORA-Teso	74	72		27	52.753	-10.753
95	83	85	90	88.25	OYAM-Lango	95		BUGIRI-Busoga	74	80.5		28	47.8077	-4.80768
					BUIKWE-North Buganda	88		KAGADI-Bunyoro	76	78		29	76.7732	-33.7732
					KIBOGA-North Buganda	87		AMURIA-Teso	77	74		30	63.3502	-19.3502
65	67	60	42	58.5	BUKOMANSIMBI-South Buganda	32		MASINDI-Bunyoro	77	80.25		31	52.3998	-7.39978
45	70	67	68	62.5	BUTAMBALA-South Buganda	54		RUKUNGIRI-Kigezi	78	66.75		32	55.2257	-10.2257
50	55	67	42	53.5	GOMBA-South Buganda	26		JINJA D-Busoga	78	69.5		33	62.9969	-16.9969
65	73	69	42	62.25	KALANGALA- South Buganda	26		MAYUGE-Busoga	79	63.75		34	52.0465	-3.04654
65	66	63	71	66.25	KALUNGU- South Buganda	49		KATAKWI-Teso	79	73		35	32.9717	21.0283
75	73	79	74	75.25	KYOTERA- South Buganda	81		IGANGA-Busoga	80	79.5		36	46.748	7.25204
40	64	56	42	50.5	LWENGO- South Buganda	27		NEBBI-West Nile	80	85.5		37	54.5192	1.48079
100	89	96	74	89.75	LYANTONDE- South Buganda	64		KYOTERA- South Buganda	81	75.25		38	53.4595	3.54051
60	66	58	42	56.5	MASAKA D- South Buganda	29		ADJUMANI-West Nile	81	86.25		39	55.9322	1.06784
75	78	92	77	80.5	MASAKA C- South Buganda			LIRA-Lango	83	63.75		40	66.1761	-5.17608
70	66	71	65	68	MPIGI- South Buganda	56		KALAKI-Teso	83	67.75		41	50.2803	11.7197
70	67	54	72	65.75	RAKAI- South Buganda	63		SOROTI CITY-Teso	83	79.25		42	51.3401	11.6599
70	69	67	70	69	SEMBABULE-S South Buganda	57		KABERAMAIDO-Teso	83	83.5		43	71.4747	-8.47466
85	63	79	69	74	AMURIA-Teso	77		GULU C-Acholi	86	83.5		44	85.251	-21.251
75	61	85	46	66.75	BUKEDEA-Teso	42		KANUNGU-Kigezi	87	64.75		45	52.753	15.247
85	88	88	73	83.5	KABERAMAIDO-Teso	83		HOIMA C-Bunyoro	88	83.5		46	59.1113	8.88869
70	70	67	64	67.75	KALAKI-Teso	83		BUTEBO-Bukedi	88	88.25		47	70.0617	0.938293
75	56	73	33	59.25	KAPELEBYONG-Teso	30		MBALE D - Bugisu Elgon	88	88.75		48	77.4797	-6.47972
45	81	90	76	73	KATAKWI-Teso	79		KABALE-Kigezi	88	89.5		49	77.833	-6.83296
95	73	88	81	84.25	KUMI-Teso	71		BUTALEJA-Bukedi	88	94.25		50	75.7135	-3.71352
75	63	71	79	72	NGORA-Teso	74		AGAGO-Acholi	90	81.75		51	60.171	13.829
70	58	77	40	61.25	SERERE-Teso	29		FORT PORTAL C- Tooro	92	74.75		52	72.1811	1.81886
80	80	79	78	79.25	SOROTI CITY-Teso	83		KABAROLE- Tooro	94	59.5		53	68.6488	7.35125
					BUNYANGABU-Tooro	38		BUDUDA-Bugisu Elgon	94	87.5		54	62.9969	14.0031
70	77	77	75	74.75	FORT PORTAL C- Tooro	92		OYAM-Lango	95	88.25		55	71.8279	5.1721
70	38	69	61	59.5	KABAROLE- Tooro	94		MANAFWA- Bugisu Elgon	98	82.5		56	52.753	25.247
30	39	60	44	43.25	KASESE-Tooro	29						57	56.6386	21.3614
					KYENJOJO-Tooro	29						58	48.5142	30.4858
100	66	69	43	69.5	NTOROKO-Tooro	40						59	61.584	17.416
95	89	88	73	86.25	ADJUMANI-West Nile	81						60	70.7682	9.23182
70	56	73	61	65	ARUA CITY-West Nile	62						61	79.2459	0.754091
80	72	75	78	76.25	MOYO-West Nile	61						62	64.7631	16.2369
90	81	92	79	85.5	NEBBI-West Nile	80						63	80.3056	0.694375
80	83	90	42	73.75	OBONGI-West Nile	35						64	48.5142	34.4858
90	63	63	45	65.25	PAKWACH-West Nil	33						65	54.166	28.834
65	66	85	53	67.25	TEREGO-West Nile	57						66	70.4149	12.5851
90	84	81	77	83	YUMBE-West Nile	72						67	76.42	6.58
77	72	77	63	72.25	Grand Total	60						68	76.42	9.58
												69	49.9271	37.0729
												70	76.42	11.58
												71	83.1315	4.86847
												72	83.838	4.16199
												73	84.8977	3.10227
												74	91.6093	-3.60926
												75	73.9473	16.0527
												76	64.0567	27.9433
												77	42.5091	51.4909
												78	82.0718	11.9282
												79	83.1315	11.8685
												80	75.007	22.993

## Sheet: 9.4Func-InherentResDivUHC
Diversity Capacity	Quality Overall	Demand Overall	Access Overall	Functionality Overall	SNUs (Districts)- Region	Coverage of Essential Services			SNUs (Districts)- Region	UHC-SCI	Func4InhResDiv
68	94	77	81	80	AGAGO-Acholi	90			KASESE-Tooro	29	45		SUMMARY OUTPUT
83	83	79	49	73.5	AMURU-Acholi	46			LWENGO- South Buganda	27	54.25
75	77	67	47	66.5	GULU-Acholi	45			GOMBA-South Buganda	26	54.75		Regression Statistics
88	91	79	84	85.5	GULU C-Acholi	86			KAPELEBYONG-Teso	30	55		Multiple R	0.685303
93	97	100	79	92.25	KITGUM - Acholi				BUGWERI-Busoga	34	55.5		R Square	0.46964
80	89	88	50	76.75	LAMWO-Acholi	44			BUKOMANSIMBI-South Buganda	32	56.75		Adjusted R Square	0.462841
82	70	85	88	81.25	NWOYA- Acholi				LUUKA-Busoga	32	57		Standard Error	16.4179
62	67	98	44	67.75	OMORO- Acholi				SERERE-Teso	29	57.5		Observations	80
82	86	88	76	83	BUDUDA-Bugisu Elgon	94			MASAKA D- South Buganda	29	57.75
83	84	81	80	82	MANAFWA- Bugisu Elgon	98			LIRA-Lango	83	58		ANOVA
80	88	90	82	85	MBALE D - Bugisu Elgon	88			AMUDAT-Karamoja	54	58.25			df	SS	MS	F	Significance F
67	64	67	81	69.75	MBALE C- Bugisu Elgon				JINJA CITY-Busoga	35	58.5		Regression	1	18617.6	18617.6	69.07	2.34927e-12
87	97	94	86	91	BUTALEJA-Bukedi	88			KABAROLE- Tooro	94	58.75		Residual	78	21024.6	269.546
77	81	94	83	83.75	BUTEBO-Bukedi	88			HOIMA D-Bunyoro	36	60		Total	79	39642.2
82	78	75	78	78.25	BULIISA-Bunyoro	71			BUYENDE-Busoga	38	60
70	56	67	47	60	HOIMA D-Bunyoro	36			KALIRO-Busoga	43	61.25			Coefficients	Standard Error	t Stat	P-value	Lower 95%	Upper 95%	Lower 95.0%	Upper 95.0%
87	78	79	92	84	HOIMA C-Bunyoro	88			PAKWACH-West Nil	33	62.25		Intercept	-48.3982	13.1298	-3.68613	0.000418716	-74.5376	-22.2587	-74.5376	-22.2587
83	72	79	76	77.5	KAGADI-Bunyoro	76			KIBAALE-Bunyoro	38	62.25		Func4InhResDiv	1.53437	0.184622	8.31084	2.34927e-12	1.16681	1.90192	1.16681	1.90192
77	58	75	39	62.25	KIBAALE-Bunyoro	38			RUBANDA-Kigezi	42	64
77	63	85	45	67.5	KIKUUBE-Bunyoro	29			TEREGO-West Nile	57	64
80	73	79	79	77.75	MASINDI-Bunyoro	77			NTOROKO-Tooro	40	64.5
77	77	81	74	77.25	BUGIRI-Busoga	74			ARUA CITY-West Nile	62	64.5		RESIDUAL OUTPUT
55	50	77	40	55.5	BUGWERI-Busoga	34			BUKEDEA-Teso	42	65
68	70	67	35	60	BUYENDE-Busoga	38			KAMULI-Busoga	68	65		Observation	Predicted UHC-SCI	Residuals
65	81	79	83	77	IGANGA-Busoga	80			RAKAI- South Buganda	63	65.25		1	20.6483	8.35167
27	80	58	69	58.5	JINJA CITY-Busoga	35			KALANGALA- South Buganda	26	65.5		2	34.8412	-7.84122
73	72	69	72	71.5	JINJA D-Busoga	78			KWANIA-Lango	38	65.5		3	35.6084	-9.6084
67	53	69	56	61.25	KALIRO-Busoga	43			MAYUGE-Busoga	79	65.75		4	35.992	-5.99199
63	59	67	71	65	KAMULI-Busoga	68			NAMAYINGO-Busoga	31	66		5	36.7592	-2.75917
73	55	71	29	57	LUUKA-Busoga	32			ALEBTONG-Lango	45	66		6	38.6771	-6.67713
68	64	67	64	65.75	MAYUGE-Busoga	79			KALAKI-Teso	83	66		7	39.0607	-7.06072
85	64	73	42	66	NAMAYINGO-Busoga	31			BUTAMBALA-South Buganda	54	66.25		8	39.8279	-10.8279
77	83	75	50	71.25	NAMUTUMBA-Busoga	38			GULU-Acholi	45	66.5		9	40.2115	-11.2115
83	72	92	84	82.75	ABIM-Karamoja	71			KALUNGU- South Buganda	49	66.75		10	40.5951	42.4049
62	41	75	55	58.25	AMUDAT-Karamoja	54			RUKUNGIRI-Kigezi	78	66.75		11	40.9787	13.0213
72	77	63	75	71.75	MOROTO-Karamoja	68			KIKUUBE-Bunyoro	29	67.5		12	41.3623	-6.36227
72	81	81	47	70.25	NABILATUK-Karamoja	39			NGORA-Teso	74	67.75		13	41.7459	52.2541
85	72	81	38	69	NAKAPIRIPIRIT-Karamoja	34			AMURIA-Teso	77	67.75		14	43.6638	-7.66382
					NAPAK-Karamoja	83			NAKAPIRIPIRIT-Karamoja	34	69		15	43.6638	-5.66382
97	92	96	80	91.25	KABALE-Kigezi	88			RUKIGA-Kigezi	41	69		16	45.5818	-2.58178
80	67	56	76	69.75	KANUNGU-Kigezi	87			SEMBABULE-S South Buganda	57	69		17	47.1161	-14.1161
75	70	90	70	76.25	KISORO-Kigezi	63			MPIGI- South Buganda	56	69.25		18	47.1161	-9.11615
75	66	79	36	64	RUBANDA-Kigezi	42			KANUNGU-Kigezi	87	69.75		19	49.8013	-7.80129
70	70	94	42	69	RUKIGA-Kigezi	41			OBONGI-West Nile	35	70		20	49.8013	7.19871
60	70	65	72	66.75	RUKUNGIRI-Kigezi	78			NABILATUK-Karamoja	39	70.25		21	50.5685	-10.5685
75	67	77	45	66	ALEBTONG-Lango	45			NAMUTUMBA-Busoga	38	71.25		22	50.5685	11.4315
80	83	75	87	81.25	AMOLATAR-Lango				JINJA D-Busoga	78	71.5		23	51.3357	-9.33565
93	91	94	50	82	KOLE-Lango	43			MOROTO-Karamoja	68	71.75		24	51.3357	16.6643
68	77	73	44	65.5	KWANIA-Lango	38			MOYO-West Nile	61	73.25		25	51.7192	11.2808
67	69	58	38	58	LIRA-Lango	83			AMURU-Acholi	46	73.5		26	52.1028	-26.1028
82	80	90	50	75.5	OTUKE-Lango	40			KYOTERA- South Buganda	81	73.5		27	52.1028	-14.1028
90	83	85	90	87	OYAM-Lango	95			OTUKE-Lango	40	75.5		28	52.4864	26.5136
					BUIKWE-North Buganda	88			KISORO-Kigezi	63	76.25		29	52.87	-21.87
					KIBOGA-North Buganda	87			FORT PORTAL C- Tooro	92	76.5		30	52.87	-7.87002
58	67	60	42	56.75	BUKOMANSIMBI-South Buganda	32			LAMWO-Acholi	44	76.75		31	52.87	30.13
60	70	67	68	66.25	BUTAMBALA-South Buganda	54			IGANGA-Busoga	80	77		32	53.2536	0.746389
55	55	67	42	54.75	GOMBA-South Buganda	26			BUGIRI-Busoga	74	77.25		33	53.6372	-8.6372
78	73	69	42	65.5	KALANGALA- South Buganda	26			KAGADI-Bunyoro	76	77.5		34	54.0208	-5.02079
67	66	63	71	66.75	KALUNGU- South Buganda	49			SOROTI CITY-Teso	83	77.5		35	54.0208	23.9792
68	73	79	74	73.5	KYOTERA- South Buganda	81			MASINDI-Bunyoro	77	77.75		36	55.1716	-26.1716
55	64	56	42	54.25	LWENGO- South Buganda	27			KATAKWI-Teso	79	78		37	55.5552	18.4448
78	89	96	74	84.25	LYANTONDE- South Buganda	64			BULIISA-Bunyoro	71	78.25		38	55.5552	21.4448
65	66	58	42	57.75	MASAKA D- South Buganda	29			KUMI-Teso	71	80		39	57.4731	-23.4731
88	78	92	77	83.75	MASAKA C- South Buganda				AGAGO-Acholi	90	80		40	57.4731	-16.4731
75	66	71	65	69.25	MPIGI- South Buganda	56			YUMBE-West Nile	72	81		41	57.4731	-0.473118
68	67	54	72	65.25	RAKAI- South Buganda	63			ADJUMANI-West Nile	81	81.25		42	57.8567	-1.85671
70	69	67	70	69	SEMBABULE-S South Buganda	57			KOLE-Lango	43	82		43	58.6239	28.3761
60	63	79	69	67.75	AMURIA-Teso	77			MANAFWA- Bugisu Elgon	98	82		44	59.0075	-24.0075
68	61	85	46	65	BUKEDEA-Teso	42			ABIM-Karamoja	71	82.75		45	59.3911	-20.3911
85	88	88	73	83.5	KABERAMAIDO-Teso	83			BUDUDA-Bugisu Elgon	94	83		46	60.9254	-22.9254
63	70	67	64	66	KALAKI-Teso	83			KABERAMAIDO-Teso	83	83.5		47	61.309	16.691
58	56	73	33	55	KAPELEBYONG-Teso	30			BUTEBO-Bukedi	88	83.75		48	61.6926	6.30737
65	81	90	76	78	KATAKWI-Teso	79			HOIMA C-Bunyoro	88	84		49	63.9942	-2.99417
78	73	88	81	80	KUMI-Teso	71			LYANTONDE- South Buganda	64	84.25		50	64.3778	-18.3778
58	63	71	79	67.75	NGORA-Teso	74			MBALE D - Bugisu Elgon	88	85		51	64.3778	16.6222
55	58	77	40	57.5	SERERE-Teso	29			GULU C-Acholi	86	85.5		52	67.4465	-27.4465
73	80	79	78	77.5	SOROTI CITY-Teso	83			OYAM-Lango	95	87		53	68.5973	-5.59727
					BUNYANGABU-Tooro	38			NEBBI-West Nile	80	88		54	68.9809	23.0191
77	77	77	75	76.5	FORT PORTAL C- Tooro	92			BUTALEJA-Bukedi	88	91		55	69.3645	-25.3645
67	38	69	61	58.75	KABAROLE- Tooro	94			KABALE-Kigezi	88	91.25		56	69.748	10.252
37	39	60	44	45	KASESE-Tooro	29							57	70.1316	3.86836
					KYENJOJO-Tooro	29							58	70.5152	5.48477
80	66	69	43	64.5	NTOROKO-Tooro	40							59	70.5152	12.4848
75	89	88	73	81.25	ADJUMANI-West Nile	81							60	70.8988	6.10118
68	56	73	61	64.5	ARUA CITY-West Nile	62							61	71.2824	7.71759
68	72	75	78	73.25	MOYO-West Nile	61							62	71.666	-0.666006
100	81	92	79	88	NEBBI-West Nile	80							63	74.3511	-3.35115
65	83	90	42	70	OBONGI-West Nile	35							64	74.3511	15.6489
78	63	63	45	62.25	PAKWACH-West Nil	33							65	75.8855	-3.88551
52	66	85	53	64	TEREGO-West Nile	57							66	76.2691	4.7309
82	84	81	77	81	YUMBE-West Nile	72							67	77.4199	-34.4199
73	72	77	63	71.25	Grand Total	60							68	77.4199	20.5801
													69	78.5707	-7.57065
													70	78.9542	15.0458
													71	79.7214	3.27857
													72	80.105	7.89498
													73	80.4886	7.51139
													74	80.8722	-16.8722
													75	82.023	5.97702
													76	82.7902	3.20984
													77	85.0917	9.90829
													78	86.6261	-6.62608
													79	91.2292	-3.22917
													80	91.6128	-3.61277

## Sheet: 10.4Func-InherentResAwarUHC
	Awareness Capacity	Quality Overall	Demand Overall	Access Overall	Functionality Overall	SNUs (Districts)- Region	Coverage of Essential Services		SNUs (Districts)- Region	UHC-SCI	Funct ADQinhResAwar
	80	94	77	81	83	AGAGO-Acholi	90		KASESE-Tooro	29	45.75		SUMMARY OUTPUT
	85	83	79	49	74	AMURU-Acholi	46		LWENGO- South Buganda	27	49.25
	80	77	67	47	67.75	GULU-Acholi	45		GOMBA-South Buganda	26	49.75		Regression Statistics
	80	91	79	84	83.5	GULU C-Acholi	86		BUKOMANSIMBI-South Buganda	32	53.5		Multiple R	0.655536
	70	97	100	79	86.5	KITGUM - Acholi			MASAKA D- South Buganda	29	54		R Square	0.429727
	80	89	88	50	76.75	LAMWO-Acholi	44		AMUDAT-Karamoja	54	54		Adjusted R Square	0.422416
	85	70	85	88	82	NWOYA- Acholi			KAPELEBYONG-Teso	30	54.25		Standard Error	17.0244
	65	67	98	44	68.5	OMORO- Acholi			KALANGALA- South Buganda	26	56		Observations	80
	100	86	88	76	87.5	BUDUDA-Bugisu Elgon	94		LUUKA-Busoga	32	56.25
	90	84	81	80	83.75	MANAFWA- Bugisu Elgon	98		LIRA-Lango	83	57.5		ANOVA
	85	88	90	82	86.25	MBALE D - Bugisu Elgon	88		BUGWERI-Busoga	34	58			df	SS	MS	F	Significance F
	65	64	67	81	69.25	MBALE C- Bugisu Elgon			JINJA CITY-Busoga	35	58		Regression	1	17035.3	17035.3	58.7766	4.15148e-11
	95	97	94	86	93	BUTALEJA-Bukedi	88		SERERE-Teso	29	58.75		Residual	78	22606.9	289.832
	65	81	94	83	80.75	BUTEBO-Bukedi	88		HOIMA D-Bunyoro	36	58.75		Total	79	39642.2
	80	78	75	78	77.75	BULIISA-Bunyoro	71		BUYENDE-Busoga	38	59.25
	65	56	67	47	58.75	HOIMA D-Bunyoro	36		KALIRO-Busoga	43	60.75			Coefficients	Standard Error	t Stat	P-value	Lower 95%	Upper 95%	Lower 95.0%	Upper 95.0%
	80	78	79	92	82.25	HOIMA C-Bunyoro	88		BUTAMBALA-South Buganda	54	61.25		Intercept	-39.0353	13.0121	-2.99992	0.00362403	-64.9403	-13.1302	-64.9403	-13.1302
	75	72	79	76	75.5	KAGADI-Bunyoro	76		MAYUGE-Busoga	79	61.25		Funct ADQinhResAwar	1.42589	0.185988	7.66659	4.15148e-11	1.05562	1.79617	1.05562	1.79617
	80	58	75	39	63	KIBAALE-Bunyoro	38		RUKUNGIRI-Kigezi	78	61.75
	75	63	85	45	67	KIKUUBE-Bunyoro	29		KIBAALE-Bunyoro	38	63
	75	73	79	79	76.5	MASINDI-Bunyoro	77		KABAROLE- Tooro	94	63.25
	75	77	81	74	76.75	BUGIRI-Busoga	74		NAMAYINGO-Busoga	31	63.5		RESIDUAL OUTPUT
	65	50	77	40	58	BUGWERI-Busoga	34		ARUA CITY-West Nile	62	63.75
	65	70	67	35	59.25	BUYENDE-Busoga	38		PAKWACH-West Nil	33	64		Observation	Predicted UHC-SCI	Residuals
	65	81	79	83	77	IGANGA-Busoga	80		RUBANDA-Kigezi	42	64		1	26.1994	2.80059
	25	80	58	69	58	JINJA CITY-Busoga	35		SEMBABULE-S South Buganda	57	64		2	31.19	-4.19004
	50	72	69	72	65.75	JINJA D-Busoga	78		KAMULI-Busoga	68	64.25		3	31.903	-5.90299
	65	53	69	56	60.75	KALIRO-Busoga	43		RAKAI- South Buganda	63	64.5		4	37.2501	-5.25009
	60	59	67	71	64.25	KAMULI-Busoga	68		TEREGO-West Nile	57	64.75		5	37.963	-8.96304
	70	55	71	29	56.25	LUUKA-Busoga	32		NAKAPIRIPIRIT-Karamoja	34	65.25		6	37.963	16.037
	50	64	67	64	61.25	MAYUGE-Busoga	79		KYOTERA- South Buganda	81	65.25		7	38.3195	-8.31951
	75	64	73	42	63.5	NAMAYINGO-Busoga	31		MPIGI- South Buganda	56	65.5		8	40.8148	-14.8148
	55	83	75	50	65.75	NAMUTUMBA-Busoga	38		NAMUTUMBA-Busoga	38	65.75		9	41.1713	-9.1713
	85	72	92	84	83.25	ABIM-Karamoja	71		NGORA-Teso	74	65.75		10	42.9537	40.0463
	45	41	75	55	54	AMUDAT-Karamoja	54		JINJA D-Busoga	78	65.75		11	43.6666	-9.66662
	60	77	63	75	68.75	MOROTO-Karamoja	68		ALEBTONG-Lango	45	66		12	43.6666	-8.66662
	75	81	81	47	71	NABILATUK-Karamoja	39		KALUNGU- South Buganda	49	66.25		13	44.736	-15.736
	70	72	81	38	65.25	NAKAPIRIPIRIT-Karamoja	34		KALAKI-Teso	83	66.5		14	44.736	-8.73604
						NAPAK-Karamoja	83		BUKEDEA-Teso	42	66.75		15	45.449	-7.44898
	75	92	96	80	85.75	KABALE-Kigezi	88		KIKUUBE-Bunyoro	29	67		16	47.5878	-4.58783
	70	67	56	76	67.25	KANUNGU-Kigezi	87		KWANIA-Lango	38	67.25		17	48.3008	5.69923
	80	70	90	70	77.5	KISORO-Kigezi	63		KANUNGU-Kigezi	87	67.25		18	48.3008	30.6992
	75	66	79	36	64	RUBANDA-Kigezi	42		GULU-Acholi	45	67.75		19	49.0137	28.9863
	80	70	94	42	71.5	RUKIGA-Kigezi	41		AMURIA-Teso	77	67.75		20	50.7961	-12.7961
	40	70	65	72	61.75	RUKUNGIRI-Kigezi	78		MOROTO-Karamoja	68	68.75		21	51.1526	42.8474
	75	67	77	45	66	ALEBTONG-Lango	45		NTOROKO-Tooro	40	69.5		22	51.509	-20.509
	90	83	75	87	83.75	AMOLATAR-Lango			NABILATUK-Karamoja	39	71		23	51.8655	10.1345
	80	91	94	50	78.75	KOLE-Lango	43		OBONGI-West Nile	35	71.25		24	52.222	-19.222
	75	77	73	44	67.25	KWANIA-Lango	38		RUKIGA-Kigezi	41	71.5		25	52.222	-10.222
	65	69	58	38	57.5	LIRA-Lango	83		MOYO-West Nile	61	72.5		26	52.222	4.77802
	85	80	90	50	76.25	OTUKE-Lango	40		SOROTI CITY-Teso	83	73		27	52.5785	15.4215
	40	83	85	90	74.5	OYAM-Lango	95		AMURU-Acholi	46	74		28	52.9349	10.0651
						BUIKWE-North Buganda	88		OYAM-Lango	95	74.5		29	53.2914	3.7086
						KIBOGA-North Buganda	87		FORT PORTAL C- Tooro	92	74.75		30	54.0043	-20.0043
	45	67	60	42	53.5	BUKOMANSIMBI-South Buganda	32		KAGADI-Bunyoro	76	75.5		31	54.0043	26.9957
	40	70	67	68	61.25	BUTAMBALA-South Buganda	54		OTUKE-Lango	40	76.25		32	54.3608	1.63918
	35	55	67	42	49.75	GOMBA-South Buganda	26		MASINDI-Bunyoro	77	76.5		33	54.7173	-16.7173
	40	73	69	42	56	KALANGALA- South Buganda	26		LAMWO-Acholi	44	76.75		34	54.7173	19.2827
	65	66	63	71	66.25	KALUNGU- South Buganda	49		KUMI-Teso	71	76.75		35	54.7173	23.2827
	35	73	79	74	65.25	KYOTERA- South Buganda	81		BUGIRI-Busoga	74	76.75		36	55.0738	-10.0738
	35	64	56	42	49.25	LWENGO- South Buganda	27		IGANGA-Busoga	80	77		37	55.4302	-6.43024
	75	89	96	74	83.5	LYANTONDE- South Buganda	64		KISORO-Kigezi	63	77.5		38	55.7867	27.2133
	50	66	58	42	54	MASAKA D- South Buganda	29		BULIISA-Bunyoro	71	77.75		39	56.1432	-14.1432
	80	78	92	77	81.75	MASAKA C- South Buganda			KATAKWI-Teso	79	78		40	56.4997	-27.4997
	60	66	71	65	65.5	MPIGI- South Buganda	56		KOLE-Lango	43	78.75		41	56.8561	-18.8561
	65	67	54	72	64.5	RAKAI- South Buganda	63		NEBBI-West Nile	80	80.5		42	56.8561	30.1439
	50	69	67	70	64	SEMBABULE-S South Buganda	57		BUTEBO-Bukedi	88	80.75		43	57.5691	-12.5691
	60	63	79	69	67.75	AMURIA-Teso	77		KABERAMAIDO-Teso	83	82.25		44	57.5691	19.4309
	75	61	85	46	66.75	BUKEDEA-Teso	42		HOIMA C-Bunyoro	88	82.25		45	58.995	9.00502
	80	88	88	73	82.25	KABERAMAIDO-Teso	83		YUMBE-West Nile	72	83		46	60.0644	-20.0644
	65	70	67	64	66.5	KALAKI-Teso	83		AGAGO-Acholi	90	83		47	62.2032	-23.2032
	55	56	73	33	54.25	KAPELEBYONG-Teso	30		ABIM-Karamoja	71	83.25		48	62.5597	-27.5597
	65	81	90	76	78	KATAKWI-Teso	79		LYANTONDE- South Buganda	64	83.5		49	62.9162	-21.9162
	65	73	88	81	76.75	KUMI-Teso	71		GULU C-Acholi	86	83.5		50	64.3421	-3.34208
	50	63	71	79	65.75	NGORA-Teso	74		MANAFWA- Bugisu Elgon	98	83.75		51	65.055	17.945
	60	58	77	40	58.75	SERERE-Teso	29		KABALE-Kigezi	88	85.75		52	66.4809	-20.4809
	55	80	79	78	73	SOROTI CITY-Teso	83		MBALE D - Bugisu Elgon	88	86.25		53	67.1939	27.8061
						BUNYANGABU-Tooro	38		ADJUMANI-West Nile	81	87.5		54	67.5503	24.4497
	70	77	77	75	74.75	FORT PORTAL C- Tooro	92		BUDUDA-Bugisu Elgon	94	87.5		55	68.6198	7.38023
	85	38	69	61	63.25	KABAROLE- Tooro	94		BUTALEJA-Bukedi	88	93		56	69.6892	-29.6892
	40	39	60	44	45.75	KASESE-Tooro	29						57	70.0457	6.95434
						KYENJOJO-Tooro	29						58	70.4021	-26.4021
	100	66	69	43	69.5	NTOROKO-Tooro	40						59	70.4021	0.597866
	100	89	88	73	87.5	ADJUMANI-West Nile	81						60	70.4021	3.59787
	65	56	73	61	63.75	ARUA CITY-West Nile	62						61	70.7586	9.24139
	65	72	75	78	72.5	MOYO-West Nile	61						62	71.4716	-8.47155
	70	81	92	79	80.5	NEBBI-West Nile	80						63	71.828	-0.828028
	70	83	90	42	71.25	OBONGI-West Nile	35						64	72.1845	6.8155
	85	63	63	45	64	PAKWACH-West Nil	33						65	73.2539	-30.2539
	55	66	85	53	64.75	TEREGO-West Nile	57						66	75.7492	4.25076
	90	84	81	77	83	YUMBE-West Nile	72						67	76.1057	11.8943
	68	72	77	63	70	Grand Total	60						68	78.2446	4.75545
													69	78.2446	9.75545
													70	79.314	-7.31397
													71	79.314	10.686
													72	79.6704	-8.67045
													73	80.0269	-16.0269
													74	80.0269	5.97308
													75	80.3834	17.6166
													76	83.2352	4.76482
													77	83.9481	4.05187
													78	85.7305	-4.7305
													79	85.7305	8.2695
													80	93.5729	-5.57292
