# Supplementary material for: Validating Uganda's Subnational Health Systems Functionality Index for Universal Health Coverage Outcomes and Revealing Capacity Gaps in Access, Quality, Demand, and Resilience
Source: Research Square preprint supplement (doi:10.21203/rs.3.rs-5743811/v1), 2025-06-04
Supplement: Supplementary file 10 [file f19dab79b7703e92cdeb3703.xlsx]

## Sheet: 11.4Func-TargetResLeadUHC 
			Row Labels	Func- Resilience		District	UHC-SCI		Row Labels	UHC-SCI	Func- Resilience														Coordination Capacity	Laboratory Capacity	Leadership Capacity	Monitoring Capacity	Targeted Resilience	Resilience Overall	Quality Overall	Demand Overall	Access Overall	Functionality Overall	SNUs (Districts)- Region	Coverage of Essential Services			Leadership Capacity	Quality Overall	Demand Overall	Access Overall	Functionality Overall	SNUs (Districts)- Region	Coverage of Essential Services		SNUs (Districts)- Region	UHC-SCI	Funct ADQRTargLead
			ABIM	79.8387		ABIM	71.4286		ABIM	71.4286	79.8387														75	88	75	92	82	78	94	77	81	81	AGAGO-Acholi	90			75	94	77	81	81.75	AGAGO-Acholi	90		LIRA-Lango	83	47.5
service_area	(All)		ADJUMANI	86.2903		ADJUMANI	81.25		ADJUMANI	81.25	86.2903		SUMMARY OUTPUT												88	88	83	67	82	85	83	79	49	76	AMURU-Acholi	46			83	83	79	49	73.5	AMURU-Acholi	46		KASESE-Tooro	29	48.25
sub_section	Robust Resilience to Shock events		AGAGO	77.8226		AGAGO	90.1786		AGAGO	90.1786	77.8226														63	81	58	75	70	74	77	67	47	68	GULU-Acholi	45			58	77	67	47	62.25	GULU-Acholi	45		KALIRO-Busoga	43	52.75
			ALEBTONG	79.8387		ALEBTONG	44.6429		ALEBTONG	44.6429	79.8387		Regression Statistics												94	88	92	83	89	85	91	79	84	85	GULU C-Acholi	86			92	91	79	84	86.5	GULU C-Acholi	86		KAPELEBYONG-Teso	30	53
Row Labels	Average of attribute_score_percent		AMUDAT	44.7581		AMUDAT	54.4643		AMUDAT	54.4643	44.7581		Multiple R	0.394224											100	100	100	100	100	95	97	100	79	92	KITGUM - Acholi				100	97	100	79	94	KITGUM - Acholi			LUUKA-Busoga	32	53.25
ABIM	79.8387		AMURIA	67.7419		AMURIA	76.7857		AMURIA	76.7857	67.7419		R Square	0.155413											56	81	75	83	73	77	89	88	50	74	LAMWO-Acholi	44			75	89	88	50	75.5	LAMWO-Acholi	44		AMUDAT-Karamoja	54	53.25
ADJUMANI	86.2903		AMURU	85.0806		AMURU	45.5357		AMURU	45.5357	85.0806		Adjusted R Square	0.144585											100	88	67	92	88	88	70	85	88	85	NWOYA- Acholi				67	70	85	88	77.5	NWOYA- Acholi			BUYENDE-Busoga	38	53.5
AGAGO	77.8226		ARUA CITY	68.9516		ARUA CITY	61.6071		ARUA CITY	61.6071	68.9516		Standard Error	20.7289											81	100	75	100	89	77	67	98	44	71	OMORO- Acholi				75	67	98	44	71	OMORO- Acholi			KABAROLE- Tooro	94	54.5
ALEBTONG	79.8387		BUDUDA	91.5323		BUDUDA	93.75		BUDUDA	93.75	91.5323		Observations	80											88	94	92	92	91	92	86	88	76	87	BUDUDA-Bugisu Elgon	94			92	86	88	76	85.5	BUDUDA-Bugisu Elgon	94		LWENGO- South Buganda	27	55
AMOLATAR	85.0806		BUGIRI	71.371		BUGIRI	74.1071		BUGIRI	74.1071	71.371														88	94	75	75	84	87	84	81	80	84	MANAFWA- Bugisu Elgon	98			75	84	81	80	80	MANAFWA- Bugisu Elgon	98		PAKWACH-West Nil	33	55.25
AMUDAT	44.7581		BUGWERI	61.2903		BUGWERI	33.9286		BUGWERI	33.9286	61.2903		ANOVA												63	88	83	100	82	84	88	90	82	84	MBALE D - Bugisu Elgon	88			83	88	90	82	85.75	MBALE D - Bugisu Elgon	88		GOMBA-South Buganda	26	55.5
AMURIA	67.7419		BUKEDEA	58.871		BUKEDEA	41.9643		BUKEDEA	41.9643	58.871			df	SS	MS	F	Significance F							88	94	75	75	84	76	64	67	81	75	MBALE C- Bugisu Elgon				75	64	67	81	71.75	MBALE C- Bugisu Elgon			MASAKA D- South Buganda	29	56
AMURU	85.0806		BUKOMANSIMBI	59.2742		BUKOMANSIMBI	32.1429		BUKOMANSIMBI	32.1429	59.2742		Regression	1	6167.2	6167.2	14.3528	0.000296595							94	94	92	100	95	93	97	94	86	92	BUTALEJA-Bukedi	88			92	97	94	86	92.25	BUTALEJA-Bukedi	88		SERERE-Teso	29	56.25
ARUA CITY	68.9516		BULIISA	80.2419		BULIISA	71.4286		BULIISA	71.4286	80.2419		Residual	78	33515.5	429.686									63	75	92	100	80	81	81	94	83	83	BUTEBO-Bukedi	88			92	81	94	83	87.5	BUTEBO-Bukedi	88		BUKEDEA-Teso	42	56.25
BUDUDA	91.5323		BUTALEJA	93.1452		BUTALEJA	87.5		BUTALEJA	87.5	93.1452		Total	79	39682.7										75	81	75	83	79	80	78	75	78	79	BULIISA-Bunyoro	71			75	78	75	78	76.5	BULIISA-Bunyoro	71		BUKOMANSIMBI-South Buganda	32	56.75
BUGIRI	71.371		BUTAMBALA	58.4677		BUTAMBALA	54.4643		BUTAMBALA	54.4643	58.4677														50	75	58	75	64	69	56	67	47	62	HOIMA D-Bunyoro	36			58	56	67	47	57	HOIMA D-Bunyoro	36		HOIMA D-Bunyoro	36	57
BUGWERI	61.2903		BUTEBO	80.6452		BUTEBO	87.5		BUTEBO	87.5	80.6452			Coefficients	Standard Error	t Stat	P-value	Lower 95%	Upper 95%	Lower 95.0%	Upper 95.0%				88	100	67	83	86	82	78	79	92	83	HOIMA C-Bunyoro	88			67	78	79	92	79	HOIMA C-Bunyoro	88		MAYUGE-Busoga	79	57
BUKEDEA	58.871		BUYENDE	56.0484		BUYENDE	37.5		BUYENDE	37.5	56.0484		Intercept	4.58871	14.7097	0.311951	0.75591	-24.696	33.8735	-24.696	33.8735				81	81	75	75	79	81	72	79	76	78	KAGADI-Bunyoro	76			75	72	79	76	75.5	KAGADI-Bunyoro	76		RUBANDA-Kigezi	42	57.75
BUKOMANSIMBI	59.2742		FORT PORTAL CITY	86.2903		FORT PORTAL CITY	91.9643		FORT PORTAL CITY	91.9643	86.2903		X Variable 1	0.769166	0.203026	3.78851	0.000296595	0.364972	1.17336	0.364972	1.17336				56	81	75	83	73	77	58	75	39	65	KIBAALE-Bunyoro	38			75	58	75	39	61.75	KIBAALE-Bunyoro	38		BUGWERI-Busoga	34	58.5
BULIISA	80.2419		GOMBA	52.8226		GOMBA	25.8929		GOMBA	25.8929	52.8226														69	81	67	75	73	77	63	85	45	69	KIKUUBE-Bunyoro	29			67	63	85	45	65	KIKUUBE-Bunyoro	29		KALAKI-Teso	83	58.5
BUTALEJA	93.1452		GULU	73.7903		GULU	44.6429		GULU	44.6429	73.7903														63	94	67	92	79	82	73	79	79	80	MASINDI-Bunyoro	77			67	73	79	79	74.5	MASINDI-Bunyoro	77		NAMAYINGO-Busoga	31	59.25
BUTAMBALA	58.4677		GULU CITY	85.4839		GULU CITY	85.7143		GULU CITY	85.7143	85.4839														44	81	50	75	63	71	77	81	74	74	BUGIRI-Busoga	74			50	77	81	74	70.5	BUGIRI-Busoga	74		RAKAI- South Buganda	63	60.75
BUTEBO	80.6452		HOIMA	68.9516		HOIMA	35.7143		HOIMA	35.7143	68.9516		RESIDUAL OUTPUT												56	50	67	58	57	61	50	77	40	56	BUGWERI-Busoga	34			67	50	77	40	58.5	BUGWERI-Busoga	34		TEREGO-West Nile	57	61.5
BUYENDE	56.0484		HOIMA CITY	81.8548		HOIMA CITY	88.3929		HOIMA CITY	88.3929	81.8548														38	56	42	42	45	56	70	67	35	55	BUYENDE-Busoga	38			42	70	67	35	53.5	BUYENDE-Busoga	38		KIBAALE-Bunyoro	38	61.75
FORT PORTAL CITY	86.2903		IGANGA	70.1613		IGANGA	80.3571		IGANGA	80.3571	70.1613		Observation	Predicted Y	Residuals										63	75	75	75	71	70	81	79	83	76	IGANGA-Busoga	80			75	81	79	83	79.5	IGANGA-Busoga	80		KAMULI-Busoga	68	61.75
GOMBA	52.8226		JINJA CITY	53.2258		JINJA CITY	34.8214		JINJA CITY	34.8214	53.2258		1	65.9979	5.43062										44	69	67	83	64	53	80	58	69	61	JINJA CITY-Busoga	35			67	80	58	69	68.5	JINJA CITY-Busoga	35		GULU-Acholi	45	62.25
GULU	73.7903		JINJA DISTRICT	58.871		JINJA D	77.6786		JINJA DISTRICT	77.6786	58.871		2	70.9603	10.2897										56	56	42	25	46	59	72	69	72	65	JINJA D-Busoga	78			42	72	69	72	63.75	JINJA D-Busoga	78		KALUNGU- South Buganda	49	62.5
GULU CITY	85.4839		KABALE	84.6774		KABALE	88.3929		KABALE	88.3929	84.6774		3	64.4472	25.7314										56	69	33	58	55	60	53	69	56	59	KALIRO-Busoga	43			33	53	69	56	52.75	KALIRO-Busoga	43		NGORA-Teso	74	63.75
HOIMA	68.9516		KABAROLE	64.5161		KABAROLE	93.75		KABAROLE	93.75	64.5161		4	65.9979	-21.3551										88	69	50	75	71	68	59	67	71	67	KAMULI-Busoga	68			50	59	67	71	61.75	KAMULI-Busoga	68		JINJA D-Busoga	78	63.75
HOIMA CITY	81.8548		KABERAMAIDO	85.0806		KABERAMAIDO	83.0357		KABERAMAIDO	83.0357	85.0806		5	39.0151	15.4492										50	75	58	42	57	65	55	71	29	57	LUUKA-Busoga	32			58	55	71	29	53.25	LUUKA-Busoga	32		ALEBTONG-Lango	45	64
IGANGA	70.1613		KAGADI	80.6452		KAGADI	75.8929		KAGADI	75.8929	80.6452		6	56.6935	20.0922										38	63	33	58	48	55	64	67	64	60	MAYUGE-Busoga	79			33	64	67	64	57	MAYUGE-Busoga	79		NAMUTUMBA-Busoga	38	64.5
JINJA CITY	53.2258		KALAKI	59.2742		KALAKI	83.0357		KALAKI	83.0357	59.2742		7	70.0299	-24.4942										69	63	58	42	59	71	64	73	42	64	NAMAYINGO-Busoga	31			58	64	73	42	59.25	NAMAYINGO-Busoga	31		KALANGALA- South Buganda	26	64.75
JINJA DISTRICT	58.871		KALANGALA	68.1452		KALANGALA	25.8929		KALANGALA	25.8929	68.1452		8	57.624	3.98318										56	69	50	58	59	66	83	75	50	66	NAMUTUMBA-Busoga	38			50	83	75	50	64.5	NAMUTUMBA-Busoga	38		NABILATUK-Karamoja	39	64.75
KABALE	84.6774		KALIRO	60.4839		KALIRO	42.8571		KALIRO	42.8571	60.4839		9	74.9922	18.7578										50	75	67	100	71	80	72	92	84	81	ABIM-Karamoja	71			67	72	92	84	78.75	ABIM-Karamoja	71		KIKUUBE-Bunyoro	29	65
KABAROLE	64.5161		KALUNGU	58.871		KALUNGU	49.1071		KALUNGU	49.1071	58.871		10	59.4848	14.6223										31	44	42	42	39	45	41	75	55	49	AMUDAT-Karamoja	54			42	41	75	55	53.25	AMUDAT-Karamoja	54		MPIGI- South Buganda	56	65
KABERAMAIDO	85.0806		KAMULI	68.1452		KAMULI	67.8571		KAMULI	67.8571	68.1452		11	51.7312	-17.8026										63	63	50	50	57	61	77	63	75	66	MOROTO-Karamoja	68			50	77	63	75	66.25	MOROTO-Karamoja	68		BUTAMBALA-South Buganda	54	65.75
KAGADI	80.6452		KANUNGU	70.5645		KANUNGU	86.6071		KANUNGU	86.6071	70.5645		12	49.8703	-7.90598										69	81	50	67	68	69	81	81	47	67	NABILATUK-Karamoja	39			50	81	81	47	64.75	NABILATUK-Karamoja	39		RUKIGA-Kigezi	41	66
KALAKI	59.2742		KAPELEBYONG	62.0968		KAPELEBYONG	30.3571		KAPELEBYONG	30.3571	62.0968		13	50.1804	-18.0376										81	81	83	75	80	80	72	81	38	69	NAKAPIRIPIRIT-Karamoja	34			83	72	81	38	68.5	NAKAPIRIPIRIT-Karamoja	34		SEMBABULE-S South Buganda	57	66
KALANGALA	68.1452		KASESE	43.9516		KASESE	28.5714		KASESE	28.5714	43.9516		14	66.3081	5.12048																				NAPAK-Karamoja	83								NAPAK-Karamoja	83		OBONGI-West Nile	35	66.25
KALIRO	60.4839		KATAKWI	64.5161		KATAKWI	78.5714		KATAKWI	78.5714	64.5161		15	76.2328	11.2672										81	81	58	92	79	85	92	96	80	86	KABALE-Kigezi	88			58	92	96	80	81.5	KABALE-Kigezi	88		ARUA CITY-West Nile	62	66.25
KALUNGU	58.871		KIBAALE	76.6129		KIBAALE	37.5		KIBAALE	37.5	76.6129		16	49.5601	4.90416										75	81	75	58	73	71	67	56	76	70	KANUNGU-Kigezi	87			75	67	56	76	68.5	KANUNGU-Kigezi	87		MOROTO-Karamoja	68	66.25
KAMULI	68.1452		KIKUUBE	77.0161		KIKUUBE	29.4643		KIKUUBE	29.4643	77.0161		17	66.6182	20.8818										75	88	83	83	82	80	70	90	70	78	KISORO-Kigezi	63			83	70	90	70	78.25	KISORO-Kigezi	63		KWANIA-Lango	38	67.25
KANUNGU	70.5645		KISORO	80.2419		KISORO	62.5		KISORO	62.5	80.2419		18	47.6992	-10.1992										63	75	50	75	66	72	66	79	36	64	RUBANDA-Kigezi	42			50	66	79	36	57.75	RUBANDA-Kigezi	42		NAKAPIRIPIRIT-Karamoja	34	68.5
KAPELEBBYONG	62.0968		KOLE	96.7742		KOLE	42.8571		KOLE	42.8571	96.7742		19	70.9603	21.004										75	69	58	83	71	71	70	94	42	67	RUKIGA-Kigezi	41			58	70	94	42	66	RUKIGA-Kigezi	41		JINJA CITY-Busoga	35	68.5
KASESE	43.9516		KUMI	79.0323		KUMI	70.5357		KUMI	70.5357	79.0323		20	45.2181	-19.3252										56	81	83	83	75	65	70	65	72	67	RUKUNGIRI-Kigezi	78			83	70	65	72	72.5	RUKUNGIRI-Kigezi	78		KANUNGU-Kigezi	87	68.5
KATAKWI	64.5161		KWANIA	75.8065		KWANIA	38.3929		KWANIA	38.3929	75.8065		21	61.3457	-16.7029										75	88	67	92	80	80	67	77	45	70	ALEBTONG-Lango	45			67	67	77	45	64	ALEBTONG-Lango	45		OTUKE-Lango	40	69.5
KIBAALE	76.6129		KYOTERA	63.3065		KYOTERA	81.25		KYOTERA	81.25	63.3065		22	70.34	15.3743										100	94	50	100	88	85	83	75	87	84	AMOLATAR-Lango				50	83	75	87	73.75	AMOLATAR-Lango			NTOROKO-Tooro	40	69.5
KIKUUBE	77.0161		LAMWO	76.6129		LAMWO	43.75		LAMWO	43.75	76.6129		23	57.624	-21.9097										100	100	100	100	100	97	91	94	50	85	KOLE-Lango	43			100	91	94	50	83.75	KOLE-Lango	43		BUGIRI-Busoga	74	70.5
KISORO	80.2419		LIRA	72.5806		LIRA	83.0357		LIRA	83.0357	72.5806		24	67.5487	20.8442										81	88	75	75	80	76	77	73	44	69	KWANIA-Lango	38			75	77	73	44	67.25	KWANIA-Lango	38		MOYO-West Nile	61	70.75
KITGUM	94.7581		LUUKA	64.5161		LUUKA	32.1429		LUUKA	32.1429	64.5161		25	58.5544	21.8027										63	100	25	92	71	73	69	58	38	63	LIRA-Lango	83			25	69	58	38	47.5	LIRA-Lango	83		AMURIA-Teso	77	71.5
KOLE	96.7742		LWENGO	52.8226		LWENGO	26.7857		LWENGO	26.7857	52.8226		26	45.5282	-10.7068										81	75	58	75	73	79	80	90	50	73	OTUKE-Lango	40			58	80	90	50	69.5	OTUKE-Lango	40		RUKUNGIRI-Kigezi	78	72.5
KUMI	79.0323		LYANTONDE	79.4355		LYANTONDE	64.2857		LYANTONDE	64.2857	79.4355		27	49.8703	27.8083										81	100	92	83	89	87	83	85	90	87	OYAM-Lango	95			92	83	85	90	87.5	OYAM-Lango	95		KYOTERA- South Buganda	81	73.25
KWANIA	75.8065		MANAFWA	86.6935		MANAFWA	98.2143		MANAFWA	98.2143	86.6935		28	69.7197	18.6731																				BUIKWE-North Buganda	88							#DIV/0!	BUIKWE-North Buganda	88		AMURU-Acholi	46	73.5
KYOTERA	63.3065		MASAKA CITY	78.2258		MASAKA CITY	29.4643		MASAKA CITY	29.4643	78.2258		29	54.2123	39.5377																				KIBOGA-North Buganda	87							#DIV/0!	KIBOGA-North Buganda	87		MASINDI-Bunyoro	77	74.5
LAMWO	76.6129		MASINDI	82.2581		MASINDI	76.7857		MASINDI	76.7857	82.2581		30	70.0299	13.0058										63	69	58	58	63	59	67	60	42	57	BUKOMANSIMBI-South Buganda	32			58	67	60	42	56.75	BUKOMANSIMBI-South Buganda	32		KUMI-Teso	71	75
LIRA	72.5806		MAYUGE	55.2419		MAYUGE	79.4643		MAYUGE	79.4643	55.2419		31	66.6182	9.27461										63	63	58	50	59	58	70	67	68	63	BUTAMBALA-South Buganda	54			58	70	67	68	65.75	BUTAMBALA-South Buganda	54		ADJUMANI-West Nile	81	75
LUUKA	64.5161		MBALE	83.871		MBALE	88.3929		MBALE	88.3929	83.871		32	50.1804	32.8553										63	56	58	50	57	53	55	67	42	52	GOMBA-South Buganda	26			58	55	67	42	55.5	GOMBA-South Buganda	26		LAMWO-Acholi	44	75.5
LWENGO	52.8226		MOROTO	60.8871		MOROTO	67.8571		MOROTO	67.8571	60.8871		33	57.0037	-31.1108										63	75	75	58	68	68	73	69	42	63	KALANGALA- South Buganda	26			75	73	69	42	64.75	KALANGALA- South Buganda	26		KAGADI-Bunyoro	76	75.5
LYANTONDE	79.4355		MOYO	73.7903		MOYO	60.7143		MOYO	60.7143	73.7903		34	51.1109	-8.25372										63	56	50	50	55	59	66	63	71	62	KALUNGU- South Buganda	49			50	66	63	71	62.5	KALUNGU- South Buganda	49		BULIISA-Bunyoro	71	76.5
MANAFWA	86.6935		MPIGI	65.7258		MPIGI	56.25		MPIGI	56.25	65.7258		35	49.8703	-0.763126										63	56	67	58	61	63	73	79	74	69	KYOTERA- South Buganda	81			67	73	79	74	73.25	KYOTERA- South Buganda	81		NEBBI-West Nile	80	77.5
MASAKA	59.6774		NABILATUK	69.3548		NABILATUK	39.2857		NABILATUK	39.2857	69.3548		36	57.0037	10.8535										63	50	58	50	55	53	64	56	42	52	LWENGO- South Buganda	27			58	64	56	42	55	LWENGO- South Buganda	27		KISORO-Kigezi	63	78.25
MASAKA CITY	78.2258		NAKAPIRIPIRIT	80.2419		NAKAPIRIPIRIT	33.9286		NAKAPIRIPIRIT	33.9286	80.2419		37	58.8646	27.7426										69	75	83	75	75	79	89	96	74	81	LYANTONDE- South Buganda	64			83	89	96	74	85.5	LYANTONDE- South Buganda	64		ABIM-Karamoja	71	78.75
MASINDI	82.2581		NAMAYINGO	70.5645		NAMAYINGO	31.25		NAMAYINGO	31.25	70.5645		38	52.3515	-21.9943										63	63	58	58	61	60	66	58	42	57	MASAKA D- South Buganda	29			58	66	58	42	56	MASAKA D- South Buganda	29		HOIMA C-Bunyoro	88	79
MAYUGE	55.2419		NAMUTUMBA	66.129		NAMUTUMBA	37.5		NAMUTUMBA	37.5	66.129		39	38.3948	-9.82338										69	81	67	83	75	78	78	92	77	79	MASAKA C- South Buganda				67	78	92	77	78.5	MASAKA C- South Buganda			IGANGA-Busoga	80	79.5
MBALE	83.871		NEBBI	83.871		NEBBI	80.3571		NEBBI	80.3571	83.871		40	54.2123	24.3591										69	69	58	58	64	66	66	71	65	66	MPIGI- South Buganda	56			58	66	71	65	65	MPIGI- South Buganda	56		SOROTI CITY-Teso	83	80
MBALE CITY	76.2097		NGORA	64.9194		NGORA	74.1071		NGORA	74.1071	64.9194		41	63.5168	-26.0168										63	56	50	50	55	63	67	54	72	65	RAKAI- South Buganda	63			50	67	54	72	60.75	RAKAI- South Buganda	63		MANAFWA- Bugisu Elgon	98	80
MOROTO	60.8871		NTOROKO	87.9032		NTOROKO	40.1786		NTOROKO	40.1786	87.9032		42	63.8269	-34.3626										63	69	58	67	64	66	69	67	70	67	SEMBABULE-S South Buganda	57			58	69	67	70	66	SEMBABULE-S South Buganda	57		FORT PORTAL C- Tooro	92	80.25
MOYO	73.7903		OBONGI	67.7419		OBONGI	34.8214		OBONGI	34.8214	67.7419		43	66.3081	-3.80809										69	81	75	83	77	68	63	79	69	68	AMURIA-Teso	77			75	63	79	69	71.5	AMURIA-Teso	77		KABERAMAIDO-Teso	83	81
MPIGI	65.7258		OTUKE	78.629		OTUKE	40.1786		OTUKE	40.1786	78.629		44	79.0241	-36.167										63	38	33	33	43	59	61	85	46	59	BUKEDEA-Teso	42			33	61	85	46	56.25	BUKEDEA-Teso	42		KABALE-Kigezi	88	81.5
NABILATUK	69.3548		OYAM	87.0968		OYAM	94.6429		OYAM	94.6429	87.0968		45	65.3777	5.15806										88	88	75	83	84	85	88	88	73	83	KABERAMAIDO-Teso	83			75	88	88	73	81	KABERAMAIDO-Teso	83		AGAGO-Acholi	90	81.75
NAKAPIRIPIRIT	80.2419		PAKWACH	75.4032		PAKWACH	33.0357		PAKWACH	33.0357	75.4032		46	62.8965	-24.5036										50	63	33	75	55	59	70	67	64	63	KALAKI-Teso	83			33	70	67	64	58.5	KALAKI-Teso	83		KATAKWI-Teso	79	82.5
NAMAYINGO	70.5645		RAKAI	63.3065		RAKAI	62.5		RAKAI	62.5	63.3065		47	53.2819	27.9681										50	88	50	83	68	62	56	73	33	57	KAPELEBYONG-Teso	30			50	56	73	33	53	KAPELEBYONG-Teso	30		YUMBE-West Nile	72	83.5
NAMUTUMBA	66.129		RUBANDA	72.1774		RUBANDA	41.9643		RUBANDA	41.9643	72.1774		48	63.5168	-19.7668										56	63	83	83	70	65	81	90	76	72	KATAKWI-Teso	79			83	81	90	76	82.5	KATAKWI-Teso	79		KOLE-Lango	43	83.75
NEBBI	83.871		RUKIGA	70.5645		RUKIGA	41.0714		RUKIGA	41.0714	70.5645		49	60.4153	22.6204										75	100	58	75	79	79	73	88	81	80	KUMI-Teso	71			58	73	88	81	75	KUMI-Teso	71		LYANTONDE- South Buganda	64	85.5
NGORA	64.9194		RUKUNGIRI	65.3226		RUKUNGIRI	77.6786		RUKUNGIRI	77.6786	65.3226		50	54.2123	-22.0695										69	94	42	83	73	65	63	71	79	68	NGORA-Teso	74			42	63	71	79	63.75	NGORA-Teso	74		BUDUDA-Bugisu Elgon	94	85.5
NTOROKO	87.9032		SEMBABULE	66.129		SEMBABULE	57.1429		SEMBABULE	57.1429	66.129		51	45.2181	-18.4323										63	81	50	83	70	62	58	77	40	59	SERERE-Teso	29			50	58	77	40	56.25	SERERE-Teso	29		MBALE D - Bugisu Elgon	88	85.75
NWOYA	88.3065		SERERE	62.0968		SERERE	28.5714		SERERE	28.5714	62.0968		52	65.6878	-1.40208										75	88	83	83	82	74	80	79	78	76	SOROTI CITY-Teso	83			83	80	79	78	80	SOROTI CITY-Teso	83		GULU C-Acholi	86	86.5
OBONGI	67.7419		SOROTI CITY	74.1935		SOROTI CITY	83.0357		SOROTI CITY	83.0357	74.1935		53	71.2705	26.9438																				BUNYANGABU-Tooro	38							#DIV/0!	BUNYANGABU-Tooro	38		BUTEBO-Bukedi	88	87.5
OMORO	77.0161		TEREGO	50.8065		TEREGO	57.1429		TEREGO	57.1429	50.8065		54	64.7574	-35.2931										100	100	92	100	98	86	77	77	75	81	FORT PORTAL C- Tooro	92			92	77	77	75	80.25	FORT PORTAL C- Tooro	92		OYAM-Lango	95	87.5
OTUKE	78.629		YUMBE	82.2581		YUMBE	72.3214		YUMBE	72.3214	82.2581		55	67.8588	8.92688										81	56	50	50	61	65	38	69	61	60	KABAROLE- Tooro	94			50	38	69	61	54.5	KABAROLE- Tooro	94		BUTALEJA-Bukedi	88	92.25
OYAM	87.0968												56	47.0789	32.3853										56	75	50	42	57	44	39	60	44	45	KASESE-Tooro	29			50	39	60	44	48.25	KASESE-Tooro	29
PAKWACH	75.4032												57	69.0994	19.2934																				KYENJOJO-Tooro	29							#DIV/0!	KYENJOJO-Tooro	29
RAKAI	63.3065												58	51.421	16.4361										63	81	100	100	84	88	66	69	43	73	NTOROKO-Tooro	40			100	66	69	43	69.5	NTOROKO-Tooro	40
RUBANDA	72.1774												59	61.3457	-0.631446										81	100	50	100	84	86	89	88	73	84	ADJUMANI-West Nile	81			50	89	88	73	75	ADJUMANI-West Nile	81
RUKIGA	70.5645												60	55.1428	1.10722										69	75	75	75	73	69	56	73	61	66	ARUA CITY-West Nile	62			75	56	73	61	66.25	ARUA CITY-West Nile	62
RUKUNGIRI	65.3226												61	57.9341	-18.6484										75	81	58	83	75	74	72	75	78	75	MOYO-West Nile	61			58	72	75	78	70.75	MOYO-West Nile	61
SERERE	62.0968												62	66.3081	-32.3795										81	88	58	67	75	84	81	92	79	83	NEBBI-West Nile	80			58	81	92	79	77.5	NEBBI-West Nile	80
SOROTI CITY	74.1935												63	58.8646	-27.6146										81	88	50	67	73	68	83	90	42	67	OBONGI-West Nile	35			50	83	90	42	66.25	OBONGI-West Nile	35
SSEMBABULE	66.129												64	55.4529	-17.9529										63	100	50	100	79	75	63	63	45	66	PAKWACH-West Nil	33			50	63	63	45	55.25	PAKWACH-West Nil	33
TEREGO	50.8065												65	69.0994	11.2577										56	63	42	42	52	51	66	85	53	57	TEREGO-West Nile	57			42	66	85	53	61.5	TEREGO-West Nile	57
YUMBE	82.2581												66	54.5225	19.5847										94	69	92	75	82	82	84	81	77	81	YUMBE-West Nile	72			92	84	81	77	83.5	YUMBE-West Nile	72
Grand Total	72.1493												67	72.2009	-32.0223										69	78	65	74	72	72	72	77	63	72	Grand Total	60			65	72	77	63	69.25	Grand Total	60
													68	56.6935	-21.8721
													69	65.0675	-24.8889
													70	71.5806	23.0623
													71	62.5863	-29.5506
													72	53.2819	9.21811
													73	60.1051	-18.1409
													74	58.8646	-17.7931
													75	54.8326	22.8459
													76	55.4529	1.68993
													77	52.3515	-23.78
													78	61.6559	21.3798
													79	43.6673	13.4755
													80	67.8588	4.4626

## Sheet: 12.4Func-TargetResMonUHC 
			Row Labels	Func- Resilience		District	UHC-SCI		Row Labels	UHC-SCI	Func- Resilience														Coordination Capacity	Laboratory Capacity	Leadership Capacity	Monitoring Capacity	Targeted Resilience	Resilience Overall	Quality Overall	Demand Overall	Access Overall	Functionality Overall	SNUs (Districts)- Region	Coverage of Essential Services			Monitoring Capacity	Quality Overall	Demand Overall	Access Overall	Functionality Overall	SNUs (Districts)- Region	Coverage of Essential Services		SNUs (Districts)- Region	UHC-SCI	Funct ADQRTargMon
			ABIM	79.8387		ABIM	71.4286		ABIM	71.4286	79.8387														75	88	75	92	82	78	94	77	81	81	AGAGO-Acholi	90			92	94	77	81	86	AGAGO-Acholi	90		MASAKA D- South Buganda	29	59.5
service_area	(All)		ADJUMANI	86.2903		ADJUMANI	81.25		ADJUMANI	81.25	86.2903		SUMMARY OUTPUT												88	88	83	67	82	85	83	79	49	76	AMURU-Acholi	46			67	83	79	49	69.5	AMURU-Acholi	46		KASESE-Tooro	29	37.5
sub_section	Robust Resilience to Shock events		AGAGO	77.8226		AGAGO	90.1786		AGAGO	90.1786	77.8226														63	81	58	75	70	74	77	67	47	68	GULU-Acholi	45			75	77	67	47	66.5	GULU-Acholi	45		KYENJOJO-Tooro	29	37
			ALEBTONG	79.8387		ALEBTONG	44.6429		ALEBTONG	44.6429	79.8387		Regression Statistics												94	88	92	83	89	85	91	79	84	85	GULU C-Acholi	86			83	91	79	84	84.25	GULU C-Acholi	86		BUKOMANSIMBI-South Buganda	32	59
Row Labels	Average of attribute_score_percent		AMUDAT	44.7581		AMUDAT	54.4643		AMUDAT	54.4643	44.7581		Multiple R	0.394224											100	100	100	100	100	95	97	100	79	92	KITGUM - Acholi				100	97	100	79	94	KITGUM - Acholi			BUYENDE-Busoga	38	38
ABIM	79.8387		AMURIA	67.7419		AMURIA	76.7857		AMURIA	76.7857	67.7419		R Square	0.155413											56	81	75	83	73	77	89	88	50	74	LAMWO-Acholi	44			83	89	88	50	77.5	LAMWO-Acholi	44		JINJA CITY-Busoga	35	39.5
ADJUMANI	86.2903		AMURU	85.0806		AMURU	45.5357		AMURU	45.5357	85.0806		Adjusted R Square	0.144585											100	88	67	92	88	88	70	85	88	85	NWOYA- Acholi				92	70	85	88	83.75	NWOYA- Acholi			KALANGALA- South Buganda	26	26
AGAGO	77.8226		ARUA CITY	68.9516		ARUA CITY	61.6071		ARUA CITY	61.6071	68.9516		Standard Error	20.7289											81	100	75	100	89	77	67	98	44	71	OMORO- Acholi				100	67	98	44	77.25	OMORO- Acholi			LWENGO- South Buganda	27	27
ALEBTONG	79.8387		BUDUDA	91.5323		BUDUDA	93.75		BUDUDA	93.75	91.5323		Observations	80											88	94	92	92	91	92	86	88	76	87	BUDUDA-Bugisu Elgon	94			92	86	88	76	85.5	BUDUDA-Bugisu Elgon	94		BUNYANGABU-Tooro	38	66
AMOLATAR	85.0806		BUGIRI	71.371		BUGIRI	74.1071		BUGIRI	74.1071	71.371														88	94	75	75	84	87	84	81	80	84	MANAFWA- Bugisu Elgon	98			75	84	81	80	80	MANAFWA- Bugisu Elgon	98		SERERE-Teso	29	63.5
AMUDAT	44.7581		BUGWERI	61.2903		BUGWERI	33.9286		BUGWERI	33.9286	61.2903		ANOVA												63	88	83	100	82	84	88	90	82	84	MBALE D - Bugisu Elgon	88			100	88	90	82	90	MBALE D - Bugisu Elgon	88		NTOROKO-Tooro	40	64
AMURIA	67.7419		BUKEDEA	58.871		BUKEDEA	41.9643		BUKEDEA	41.9643	58.871			df	SS	MS	F	Significance F							88	94	75	75	84	76	64	67	81	75	MBALE C- Bugisu Elgon				75	64	67	81	71.75	MBALE C- Bugisu Elgon			KALIRO-Busoga	43	43
AMURU	85.0806		BUKOMANSIMBI	59.2742		BUKOMANSIMBI	32.1429		BUKOMANSIMBI	32.1429	59.2742		Regression	1	6167.2	6167.2	14.3528	0.000296595							94	94	92	100	95	93	97	94	86	92	BUTALEJA-Bukedi	88			100	97	94	86	94.25	BUTALEJA-Bukedi	88		LAMWO-Acholi	44	66
ARUA CITY	68.9516		BULIISA	80.2419		BULIISA	71.4286		BULIISA	71.4286	80.2419		Residual	78	33515.5	429.686									63	75	92	100	80	81	81	94	83	83	BUTEBO-Bukedi	88			100	81	94	83	89.5	BUTEBO-Bukedi	88		KIBAALE-Bunyoro	38	63
BUDUDA	91.5323		BUTALEJA	93.1452		BUTALEJA	87.5		BUTALEJA	87.5	93.1452		Total	79	39682.7										75	81	75	83	79	80	78	75	78	79	BULIISA-Bunyoro	71			83	78	75	78	78.5	BULIISA-Bunyoro	71		NABILATUK-Karamoja	39	55
BUGIRI	71.371		BUTAMBALA	58.4677		BUTAMBALA	54.4643		BUTAMBALA	54.4643	58.4677														50	75	58	75	64	69	56	67	47	62	HOIMA D-Bunyoro	36			75	56	67	47	61.25	HOIMA D-Bunyoro	36		GULU-Acholi	45	40.5
BUGWERI	61.2903		BUTEBO	80.6452		BUTEBO	87.5		BUTEBO	87.5	80.6452			Coefficients	Standard Error	t Stat	P-value	Lower 95%	Upper 95%	Lower 95.0%	Upper 95.0%				88	100	67	83	86	82	78	79	92	83	HOIMA C-Bunyoro	88			83	78	79	92	83	HOIMA C-Bunyoro	88		RUBANDA-Kigezi	42	65
BUKEDEA	58.871		BUYENDE	56.0484		BUYENDE	37.5		BUYENDE	37.5	56.0484		Intercept	4.58871	14.7097	0.311951	0.75591	-24.696	33.8735	-24.696	33.8735				81	81	75	75	79	81	72	79	76	78	KAGADI-Bunyoro	76			75	72	79	76	75.5	KAGADI-Bunyoro	76		BUTAMBALA-South Buganda	54	65
BUKOMANSIMBI	59.2742		FORT PORTAL CITY	86.2903		FORT PORTAL CITY	91.9643		FORT PORTAL CITY	91.9643	86.2903		X Variable 1	0.769166	0.203026	3.78851	0.000296595	0.364972	1.17336	0.364972	1.17336				56	81	75	83	73	77	58	75	39	65	KIBAALE-Bunyoro	38			83	58	75	39	63.75	KIBAALE-Bunyoro	38		AMUDAT-Karamoja	54	46
BULIISA	80.2419		GOMBA	52.8226		GOMBA	25.8929		GOMBA	25.8929	52.8226														69	81	67	75	73	77	63	85	45	69	KIKUUBE-Bunyoro	29			75	63	85	45	67	KIKUUBE-Bunyoro	29		AMURU-Acholi	46	37.5
BUTALEJA	93.1452		GULU	73.7903		GULU	44.6429		GULU	44.6429	73.7903														63	94	67	92	79	82	73	79	79	80	MASINDI-Bunyoro	77			92	73	79	79	80.75	MASINDI-Bunyoro	77		AMURIA-Teso	77	77
BUTAMBALA	58.4677		GULU CITY	85.4839		GULU CITY	85.7143		GULU CITY	85.7143	85.4839														44	81	50	75	63	71	77	81	74	74	BUGIRI-Busoga	74			75	77	81	74	76.75	BUGIRI-Busoga	74		ARUA CITY-West Nile	62	68
BUTEBO	80.6452		HOIMA	68.9516		HOIMA	35.7143		HOIMA	35.7143	68.9516		RESIDUAL OUTPUT												56	50	67	58	57	61	50	77	40	56	BUGWERI-Busoga	34			58	50	77	40	56.25	BUGWERI-Busoga	34		KISORO-Kigezi	63	48.5
BUYENDE	56.0484		HOIMA CITY	81.8548		HOIMA CITY	88.3929		HOIMA CITY	88.3929	81.8548														38	56	42	42	45	56	70	67	35	55	BUYENDE-Busoga	38			42	70	67	35	53.5	BUYENDE-Busoga	38		JINJA D-Busoga	78	58
FORT PORTAL CITY	86.2903		IGANGA	70.1613		IGANGA	80.3571		IGANGA	80.3571	70.1613		Observation	Predicted Y	Residuals										63	75	75	75	71	70	81	79	83	76	IGANGA-Busoga	80			75	81	79	83	79.5	IGANGA-Busoga	80		NAKAPIRIPIRIT-Karamoja	34	57
GOMBA	52.8226		JINJA CITY	53.2258		JINJA CITY	34.8214		JINJA CITY	34.8214	53.2258		1	65.9979	5.43062										44	69	67	83	64	53	80	58	69	61	JINJA CITY-Busoga	35			83	80	58	69	72.5	JINJA CITY-Busoga	35		KATAKWI-Teso	79	57
GULU	73.7903		JINJA DISTRICT	58.871		JINJA D	77.6786		JINJA DISTRICT	77.6786	58.871		2	70.9603	10.2897										56	56	42	25	46	59	72	69	72	65	JINJA D-Busoga	78			25	72	69	72	59.5	JINJA D-Busoga	78		KAGADI-Bunyoro	76	77
GULU CITY	85.4839		KABALE	84.6774		KABALE	88.3929		KABALE	88.3929	84.6774		3	64.4472	25.7314										56	69	33	58	55	60	53	69	56	59	KALIRO-Busoga	43			58	53	69	56	59	KALIRO-Busoga	43		LYANTONDE- South Buganda	64	53.5
HOIMA	68.9516		KABAROLE	64.5161		KABAROLE	93.75		KABAROLE	93.75	64.5161		4	65.9979	-21.3551										88	69	50	75	71	68	59	67	71	67	KAMULI-Busoga	68			75	59	67	71	68	KAMULI-Busoga	68		BULIISA-Bunyoro	71	69.5
HOIMA CITY	81.8548		KABERAMAIDO	85.0806		KABERAMAIDO	83.0357		KABERAMAIDO	83.0357	85.0806		5	39.0151	15.4492										50	75	58	42	57	65	55	71	29	57	LUUKA-Busoga	32			42	55	71	29	49.25	LUUKA-Busoga	32		NEBBI-West Nile	80	56
IGANGA	70.1613		KAGADI	80.6452		KAGADI	75.8929		KAGADI	75.8929	80.6452		6	56.6935	20.0922										38	63	33	58	48	55	64	67	64	60	MAYUGE-Busoga	79			58	64	67	64	63.25	MAYUGE-Busoga	79		BUKEDEA-Teso	42	60.5
JINJA CITY	53.2258		KALAKI	59.2742		KALAKI	83.0357		KALAKI	83.0357	59.2742		7	70.0299	-24.4942										69	63	58	42	59	71	64	73	42	64	NAMAYINGO-Busoga	31			42	64	73	42	55.25	NAMAYINGO-Busoga	31		MOROTO-Karamoja	68	49.5
JINJA DISTRICT	58.871		KALANGALA	68.1452		KALANGALA	25.8929		KALANGALA	25.8929	68.1452		8	57.624	3.98318										56	69	50	58	59	66	83	75	50	66	NAMUTUMBA-Busoga	38			58	83	75	50	66.5	NAMUTUMBA-Busoga	38		KUMI-Teso	71	54.5
KABALE	84.6774		KALIRO	60.4839		KALIRO	42.8571		KALIRO	42.8571	60.4839		9	74.9922	18.7578										50	75	67	100	71	80	72	92	84	81	ABIM-Karamoja	71			100	72	92	84	87	ABIM-Karamoja	71		HOIMA D-Bunyoro	36	53.5
KABAROLE	64.5161		KALUNGU	58.871		KALUNGU	49.1071		KALUNGU	49.1071	58.871		10	59.4848	14.6223										31	44	42	42	39	45	41	75	55	49	AMUDAT-Karamoja	54			42	41	75	55	53.25	AMUDAT-Karamoja	54		KWANIA-Lango	38	46
KABERAMAIDO	85.0806		KAMULI	68.1452		KAMULI	67.8571		KAMULI	67.8571	68.1452		11	51.7312	-17.8026										63	63	50	50	57	61	77	63	75	66	MOROTO-Karamoja	68			50	77	63	75	66.25	MOROTO-Karamoja	68		KIKUUBE-Bunyoro	29	48.5
KAGADI	80.6452		KANUNGU	70.5645		KANUNGU	86.6071		KANUNGU	86.6071	70.5645		12	49.8703	-7.90598										69	81	50	67	68	69	81	81	47	67	NABILATUK-Karamoja	39			67	81	81	47	69	NABILATUK-Karamoja	39		NAMUTUMBA-Busoga	38	38.5
KALAKI	59.2742		KAPELEBYONG	62.0968		KAPELEBYONG	30.3571		KAPELEBYONG	30.3571	62.0968		13	50.1804	-18.0376										81	81	83	75	80	80	72	81	38	69	NAKAPIRIPIRIT-Karamoja	34			75	72	81	38	66.5	NAKAPIRIPIRIT-Karamoja	34		GOMBA-South Buganda	26	30
KALANGALA	68.1452		KASESE	43.9516		KASESE	28.5714		KASESE	28.5714	43.9516		14	66.3081	5.12048																				NAPAK-Karamoja	83								NAPAK-Karamoja	83		ALEBTONG-Lango	45	64
KALIRO	60.4839		KATAKWI	64.5161		KATAKWI	78.5714		KATAKWI	78.5714	64.5161		15	76.2328	11.2672										81	81	58	92	79	85	92	96	80	86	KABALE-Kigezi	88			92	92	96	80	90	KABALE-Kigezi	88		KALUNGU- South Buganda	49	68.5
KALUNGU	58.871		KIBAALE	76.6129		KIBAALE	37.5		KIBAALE	37.5	76.6129		16	49.5601	4.90416										75	81	75	58	73	71	67	56	76	70	KANUNGU-Kigezi	87			58	67	56	76	64.25	KANUNGU-Kigezi	87		KANUNGU-Kigezi	87	87
KAMULI	68.1452		KIKUUBE	77.0161		KIKUUBE	29.4643		KIKUUBE	29.4643	77.0161		17	66.6182	20.8818										75	88	83	83	82	80	70	90	70	78	KISORO-Kigezi	63			83	70	90	70	78.25	KISORO-Kigezi	63		BUTEBO-Bukedi	88	75.5
KANUNGU	70.5645		KISORO	80.2419		KISORO	62.5		KISORO	62.5	80.2419		18	47.6992	-10.1992										63	75	50	75	66	72	66	79	36	64	RUBANDA-Kigezi	42			75	66	79	36	64	RUBANDA-Kigezi	42		RUKIGA-Kigezi	41	41.5
KAPELEBBYONG	62.0968		KOLE	96.7742		KOLE	42.8571		KOLE	42.8571	96.7742		19	70.9603	21.004										75	69	58	83	71	71	70	94	42	67	RUKIGA-Kigezi	41			83	70	94	42	72.25	RUKIGA-Kigezi	41		LUUKA-Busoga	32	36.5
KASESE	43.9516		KUMI	79.0323		KUMI	70.5357		KUMI	70.5357	79.0323		20	45.2181	-19.3252										56	81	83	83	75	65	70	65	72	67	RUKUNGIRI-Kigezi	78			83	70	65	72	72.5	RUKUNGIRI-Kigezi	78		OTUKE-Lango	40	59
KATAKWI	64.5161		KWANIA	75.8065		KWANIA	38.3929		KWANIA	38.3929	75.8065		21	61.3457	-16.7029										75	88	67	92	80	80	67	77	45	70	ALEBTONG-Lango	45			92	67	77	45	70.25	ALEBTONG-Lango	45		PAKWACH-West Nil	33	39
KIBAALE	76.6129		KYOTERA	63.3065		KYOTERA	81.25		KYOTERA	81.25	63.3065		22	70.34	15.3743										100	94	50	100	88	85	83	75	87	84	AMOLATAR-Lango				100	83	75	87	86.25	AMOLATAR-Lango			FORT PORTAL C- Tooro	92	92
KIKUUBE	77.0161		LAMWO	76.6129		LAMWO	43.75		LAMWO	43.75	76.6129		23	57.624	-21.9097										100	100	100	100	100	97	91	94	50	85	KOLE-Lango	43			100	91	94	50	83.75	KOLE-Lango	43		BUGWERI-Busoga	34	38.5
KISORO	80.2419		LIRA	72.5806		LIRA	83.0357		LIRA	83.0357	72.5806		24	67.5487	20.8442										81	88	75	75	80	76	77	73	44	69	KWANIA-Lango	38			75	77	73	44	67.25	KWANIA-Lango	38		KOLE-Lango	43	40.5
KITGUM	94.7581		LUUKA	64.5161		LUUKA	32.1429		LUUKA	32.1429	64.5161		25	58.5544	21.8027										63	100	25	92	71	73	69	58	38	63	LIRA-Lango	83			92	69	58	38	64.25	LIRA-Lango	83		OBONGI-West Nile	35	59
KOLE	96.7742		LWENGO	52.8226		LWENGO	26.7857		LWENGO	26.7857	52.8226		26	45.5282	-10.7068										81	75	58	75	73	79	80	90	50	73	OTUKE-Lango	40			75	80	90	50	73.75	OTUKE-Lango	40		BUDUDA-Bugisu Elgon	94	67
KUMI	79.0323		LYANTONDE	79.4355		LYANTONDE	64.2857		LYANTONDE	64.2857	79.4355		27	49.8703	27.8083										81	100	92	83	89	87	83	85	90	87	OYAM-Lango	95			83	83	85	90	85.25	OYAM-Lango	95		KAPELEBYONG-Teso	30	62.5
KWANIA	75.8065		MANAFWA	86.6935		MANAFWA	98.2143		MANAFWA	98.2143	86.6935		28	69.7197	18.6731																				BUIKWE-North Buganda	88							#DIV/0!	BUIKWE-North Buganda	88		MOYO-West Nile	61	74.5
KYOTERA	63.3065		MASAKA CITY	78.2258		MASAKA CITY	29.4643		MASAKA CITY	29.4643	78.2258		29	54.2123	39.5377																				KIBOGA-North Buganda	87							#DIV/0!	KIBOGA-North Buganda	87		KALAKI-Teso	83	85
LAMWO	76.6129		MASINDI	82.2581		MASINDI	76.7857		MASINDI	76.7857	82.2581		30	70.0299	13.0058										63	69	58	58	63	59	67	60	42	57	BUKOMANSIMBI-South Buganda	32			58	67	60	42	56.75	BUKOMANSIMBI-South Buganda	32		KABALE-Kigezi	88	60
LIRA	72.5806		MAYUGE	55.2419		MAYUGE	79.4643		MAYUGE	79.4643	55.2419		31	66.6182	9.27461										63	63	58	50	59	58	70	67	68	63	BUTAMBALA-South Buganda	54			50	70	67	68	63.75	BUTAMBALA-South Buganda	54		RUKUNGIRI-Kigezi	78	66
LUUKA	64.5161		MBALE	83.871		MBALE	88.3929		MBALE	88.3929	83.871		32	50.1804	32.8553										63	56	58	50	57	53	55	67	42	52	GOMBA-South Buganda	26			50	55	67	42	53.5	GOMBA-South Buganda	26		NAMAYINGO-Busoga	31	28.5
LWENGO	52.8226		MOROTO	60.8871		MOROTO	67.8571		MOROTO	67.8571	60.8871		33	57.0037	-31.1108										63	75	75	58	68	68	73	69	42	63	KALANGALA- South Buganda	26			58	73	69	42	60.5	KALANGALA- South Buganda	26		MASINDI-Bunyoro	77	51.5
LYANTONDE	79.4355		MOYO	73.7903		MOYO	60.7143		MOYO	60.7143	73.7903		34	51.1109	-8.25372										63	56	50	50	55	59	66	63	71	62	KALUNGU- South Buganda	49			50	66	63	71	62.5	KALUNGU- South Buganda	49		KABAROLE- Tooro	94	71.5
MANAFWA	86.6935		MPIGI	65.7258		MPIGI	56.25		MPIGI	56.25	65.7258		35	49.8703	-0.763126										63	56	67	58	61	63	73	79	74	69	KYOTERA- South Buganda	81			58	73	79	74	71	KYOTERA- South Buganda	81		KAMULI-Busoga	68	74.5
MASAKA	59.6774		NABILATUK	69.3548		NABILATUK	39.2857		NABILATUK	39.2857	69.3548		36	57.0037	10.8535										63	50	58	50	55	53	64	56	42	52	LWENGO- South Buganda	27			50	64	56	42	53	LWENGO- South Buganda	27		ADJUMANI-West Nile	81	54
MASAKA CITY	78.2258		NAKAPIRIPIRIT	80.2419		NAKAPIRIPIRIT	33.9286		NAKAPIRIPIRIT	33.9286	80.2419		37	58.8646	27.7426										69	75	83	75	75	79	89	96	74	81	LYANTONDE- South Buganda	64			75	89	96	74	83.5	LYANTONDE- South Buganda	64		MPIGI- South Buganda	56	60
MASINDI	82.2581		NAMAYINGO	70.5645		NAMAYINGO	31.25		NAMAYINGO	31.25	70.5645		38	52.3515	-21.9943										63	63	58	58	61	60	66	58	42	57	MASAKA D- South Buganda	29			58	66	58	42	56	MASAKA D- South Buganda	29		LIRA-Lango	83	56
MAYUGE	55.2419		NAMUTUMBA	66.129		NAMUTUMBA	37.5		NAMUTUMBA	37.5	66.129		39	38.3948	-9.82338										69	81	67	83	75	78	78	92	77	79	MASAKA C- South Buganda				83	78	92	77	82.5	MASAKA C- South Buganda			RAKAI- South Buganda	63	63
MBALE	83.871		NEBBI	83.871		NEBBI	80.3571		NEBBI	80.3571	83.871		40	54.2123	24.3591										69	69	58	58	64	66	66	71	65	66	MPIGI- South Buganda	56			58	66	71	65	65	MPIGI- South Buganda	56		TEREGO-West Nile	57	56.5
MBALE CITY	76.2097		NGORA	64.9194		NGORA	74.1071		NGORA	74.1071	64.9194		41	63.5168	-26.0168										63	56	50	50	55	63	67	54	72	65	RAKAI- South Buganda	63			50	67	54	72	60.75	RAKAI- South Buganda	63		IGANGA-Busoga	80	71.5
MOROTO	60.8871		NTOROKO	87.9032		NTOROKO	40.1786		NTOROKO	40.1786	87.9032		42	63.8269	-34.3626										63	69	58	67	64	66	69	67	70	67	SEMBABULE-S South Buganda	57			67	69	67	70	68.25	SEMBABULE-S South Buganda	57		SEMBABULE-S South Buganda	57	57
MOYO	73.7903		OBONGI	67.7419		OBONGI	34.8214		OBONGI	34.8214	67.7419		43	66.3081	-3.80809										69	81	75	83	77	68	63	79	69	68	AMURIA-Teso	77			83	63	79	69	73.5	AMURIA-Teso	77		ABIM-Karamoja	71	74
MPIGI	65.7258		OTUKE	78.629		OTUKE	40.1786		OTUKE	40.1786	78.629		44	79.0241	-36.167										63	38	33	33	43	59	61	85	46	59	BUKEDEA-Teso	42			33	61	85	46	56.25	BUKEDEA-Teso	42		MBALE D - Bugisu Elgon	88	65
NABILATUK	69.3548		OYAM	87.0968		OYAM	94.6429		OYAM	94.6429	87.0968		45	65.3777	5.15806										88	88	75	83	84	85	88	88	73	83	KABERAMAIDO-Teso	83			83	88	88	73	83	KABERAMAIDO-Teso	83		MAYUGE-Busoga	79	81
NAKAPIRIPIRIT	80.2419		PAKWACH	75.4032		PAKWACH	33.0357		PAKWACH	33.0357	75.4032		46	62.8965	-24.5036										50	63	33	75	55	59	70	67	64	63	KALAKI-Teso	83			75	70	67	64	69	KALAKI-Teso	83		KABERAMAIDO-Teso	83	83
NAMAYINGO	70.5645		RAKAI	63.3065		RAKAI	62.5		RAKAI	62.5	63.3065		47	53.2819	27.9681										50	88	50	83	68	62	56	73	33	57	KAPELEBYONG-Teso	30			83	56	73	33	61.25	KAPELEBYONG-Teso	30		MANAFWA- Bugisu Elgon	98	64
NAMUTUMBA	66.129		RUBANDA	72.1774		RUBANDA	41.9643		RUBANDA	41.9643	72.1774		48	63.5168	-19.7668										56	63	83	83	70	65	81	90	76	72	KATAKWI-Teso	79			83	81	90	76	82.5	KATAKWI-Teso	79		NGORA-Teso	74	76.5
NEBBI	83.871		RUKIGA	70.5645		RUKIGA	41.0714		RUKIGA	41.0714	70.5645		49	60.4153	22.6204										75	100	58	75	79	79	73	88	81	80	KUMI-Teso	71			75	73	88	81	79.25	KUMI-Teso	71		BUGIRI-Busoga	74	72.5
NGORA	64.9194		RUKUNGIRI	65.3226		RUKUNGIRI	77.6786		RUKUNGIRI	77.6786	65.3226		50	54.2123	-22.0695										69	94	42	83	73	65	63	71	79	68	NGORA-Teso	74			83	63	71	79	74	NGORA-Teso	74		KYOTERA- South Buganda	81	77.5
NTOROKO	87.9032		SEMBABULE	66.129		SEMBABULE	57.1429		SEMBABULE	57.1429	66.129		51	45.2181	-18.4323										63	81	50	83	70	62	58	77	40	59	SERERE-Teso	29			83	58	77	40	64.5	SERERE-Teso	29		BUTALEJA-Bukedi	88	58.5
NWOYA	88.3065		SERERE	62.0968		SERERE	28.5714		SERERE	28.5714	62.0968		52	65.6878	-1.40208										75	88	83	83	82	74	80	79	78	76	SOROTI CITY-Teso	83			83	80	79	78	80	SOROTI CITY-Teso	83		SOROTI CITY-Teso	83	83
OBONGI	67.7419		SOROTI CITY	74.1935		SOROTI CITY	83.0357		SOROTI CITY	83.0357	74.1935		53	71.2705	26.9438																				BUNYANGABU-Tooro	38							#DIV/0!	BUNYANGABU-Tooro	38		KIBOGA-North Buganda	87	62.5
OMORO	77.0161		TEREGO	50.8065		TEREGO	57.1429		TEREGO	57.1429	50.8065		54	64.7574	-35.2931										100	100	92	100	98	86	77	77	75	81	FORT PORTAL C- Tooro	92			100	77	77	75	82.25	FORT PORTAL C- Tooro	92		YUMBE-West Nile	72	82
OTUKE	78.629		YUMBE	82.2581		YUMBE	72.3214		YUMBE	72.3214	82.2581		55	67.8588	8.92688										81	56	50	50	61	65	38	69	61	60	KABAROLE- Tooro	94			50	38	69	61	54.5	KABAROLE- Tooro	94		GULU C-Acholi	86	90
OYAM	87.0968												56	47.0789	32.3853										56	75	50	42	57	44	39	60	44	45	KASESE-Tooro	29			42	39	60	44	46.25	KASESE-Tooro	29		HOIMA C-Bunyoro	88	58.5
PAKWACH	75.4032												57	69.0994	19.2934																				KYENJOJO-Tooro	29							#DIV/0!	KYENJOJO-Tooro	29		OYAM-Lango	95	62
RAKAI	63.3065												58	51.421	16.4361										63	81	100	100	84	88	66	69	43	73	NTOROKO-Tooro	40			100	66	69	43	69.5	NTOROKO-Tooro	40		BUIKWE-North Buganda	88	64
RUBANDA	72.1774												59	61.3457	-0.631446										81	100	50	100	84	86	89	88	73	84	ADJUMANI-West Nile	81			100	89	88	73	87.5	ADJUMANI-West Nile	81		AGAGO-Acholi	90	85.5
RUKIGA	70.5645												60	55.1428	1.10722										69	75	75	75	73	69	56	73	61	66	ARUA CITY-West Nile	62			75	56	73	61	66.25	ARUA CITY-West Nile	62
RUKUNGIRI	65.3226												61	57.9341	-18.6484										75	81	58	83	75	74	72	75	78	75	MOYO-West Nile	61			83	72	75	78	77	MOYO-West Nile	61
SERERE	62.0968												62	66.3081	-32.3795										81	88	58	67	75	84	81	92	79	83	NEBBI-West Nile	80			67	81	92	79	79.75	NEBBI-West Nile	80
SOROTI CITY	74.1935												63	58.8646	-27.6146										81	88	50	67	73	68	83	90	42	67	OBONGI-West Nile	35			67	83	90	42	70.5	OBONGI-West Nile	35
SSEMBABULE	66.129												64	55.4529	-17.9529										63	100	50	100	79	75	63	63	45	66	PAKWACH-West Nil	33			100	63	63	45	67.75	PAKWACH-West Nil	33
TEREGO	50.8065												65	69.0994	11.2577										56	63	42	42	52	51	66	85	53	57	TEREGO-West Nile	57			42	66	85	53	61.5	TEREGO-West Nile	57
YUMBE	82.2581												66	54.5225	19.5847										94	69	92	75	82	82	84	81	77	81	YUMBE-West Nile	72			75	84	81	77	79.25	YUMBE-West Nile	72
Grand Total	72.1493												67	72.2009	-32.0223										69	78	65	74	72	72	72	77	63	72	Grand Total	60			74	72	77	63	71.5	Grand Total	60
													68	56.6935	-21.8721
													69	65.0675	-24.8889
													70	71.5806	23.0623
													71	62.5863	-29.5506
													72	53.2819	9.21811
													73	60.1051	-18.1409
													74	58.8646	-17.7931
													75	54.8326	22.8459
													76	55.4529	1.68993
													77	52.3515	-23.78
													78	61.6559	21.3798
													79	43.6673	13.4755
													80	67.8588	4.4626

## Sheet: 13.4Func-TargetResLabUHC
	Laboratory Capacity	Quality Overall	Demand Overall	Access Overall	Functionality Overall	SNUs (Districts)- Region	Coverage of Essential Services		SNUs (Districts)- Region	UHC-SCI	Funct ADQRTargLab
	88	94	77	81	85	AGAGO-Acholi	90		LWENGO- South Buganda	27	53		SUMMARY OUTPUT
	88	83	79	49	74.75	AMURU-Acholi	46		AMUDAT-Karamoja	54	53.75
	81	77	67	47	68	GULU-Acholi	45		BUGWERI-Busoga	34	54.25		Regression Statistics
	88	91	79	84	85.5	GULU C-Acholi	86		KASESE-Tooro	29	54.5		Multiple R	0.681656
	100	97	100	79	94	KITGUM - Acholi			GOMBA-South Buganda	26	55		R Square	0.464654
	81	89	88	50	77	LAMWO-Acholi	44		KABAROLE- Tooro	94	56		Adjusted R Square	0.457791
	88	70	85	88	82.75	NWOYA- Acholi			BUYENDE-Busoga	38	57		Standard Error	16.4949
	100	67	98	44	77.25	OMORO- Acholi			MASAKA D- South Buganda	29	57.25		Observations	80
	94	86	88	76	86	BUDUDA-Bugisu Elgon	94		LUUKA-Busoga	32	57.5
	94	84	81	80	84.75	MANAFWA- Bugisu Elgon	98		BUKEDEA-Teso	42	57.5		ANOVA
	88	88	90	82	87	MBALE D - Bugisu Elgon	88		BUKOMANSIMBI-South Buganda	32	59.5			df	SS	MS	F	Significance F
	94	64	67	81	76.5	MBALE C- Bugisu Elgon			NAMAYINGO-Busoga	31	60.5		Regression	1	18419.9	18419.9	67.7002	3.40114e-12
	94	97	94	86	92.75	BUTALEJA-Bukedi	88		HOIMA D-Bunyoro	36	61.25		Residual	78	21222.3	272.081
	75	81	94	83	83.25	BUTEBO-Bukedi	88		KALIRO-Busoga	43	61.75		Total	79	39642.2
	81	78	75	78	78	BULIISA-Bunyoro	71		RAKAI- South Buganda	63	62.25
	75	56	67	47	61.25	HOIMA D-Bunyoro	36		KAPELEBYONG-Teso	30	62.5			Coefficients	Standard Error	t Stat	P-value	Lower 95%	Upper 95%	Lower 95.0%	Upper 95.0%
	100	78	79	92	87.25	HOIMA C-Bunyoro	88		KIBAALE-Bunyoro	38	63.25		Intercept	-47.7771	13.1859	-3.62336	0.000515843	-74.0282	-21.5261	-74.0282	-21.5261
	81	72	79	76	77	KAGADI-Bunyoro	76		SERERE-Teso	29	64		Funct ADQRTargLab	1.50064	0.182382	8.22802	3.40114e-12	1.13755	1.86374	1.13755	1.86374
	81	58	75	39	63.25	KIBAALE-Bunyoro	38		RUBANDA-Kigezi	42	64
	81	63	85	45	68.5	KIKUUBE-Bunyoro	29		KALUNGU- South Buganda	49	64
	94	73	79	79	81.25	MASINDI-Bunyoro	77		MAYUGE-Busoga	79	64.5
	81	77	81	74	78.25	BUGIRI-Busoga	74		KALANGALA- South Buganda	26	64.75		RESIDUAL OUTPUT
	50	50	77	40	54.25	BUGWERI-Busoga	34		NTOROKO-Tooro	40	64.75
	56	70	67	35	57	BUYENDE-Busoga	38		KALAKI-Teso	83	66		Observation	Predicted UHC-SCI	Residuals	Standard Residuals
	75	81	79	83	79.5	IGANGA-Busoga	80		ARUA CITY-West Nile	62	66.25		1	31.7568	-4.75683	-0.290225
	69	80	58	69	69	JINJA CITY-Busoga	35		LIRA-Lango	83	66.25		2	32.8823	21.1177	1.28844
	56	72	69	72	67.25	JINJA D-Busoga	78		KAMULI-Busoga	68	66.5		3	33.6326	0.367365	0.0224138
	69	53	69	56	61.75	KALIRO-Busoga	43		TEREGO-West Nile	57	66.75		4	34.0078	-5.0078	-0.305537
	69	59	67	71	66.5	KAMULI-Busoga	68		BUTAMBALA-South Buganda	54	67		5	34.7581	-8.75812	-0.534353
	75	55	71	29	57.5	LUUKA-Busoga	32		JINJA D-Busoga	78	67.25		6	36.2588	57.7412	3.52293
	63	64	67	64	64.5	MAYUGE-Busoga	79		PAKWACH-West Nil	33	67.75		7	37.7594	0.240602	0.0146797
	63	64	73	42	60.5	NAMAYINGO-Busoga	31		MPIGI- South Buganda	56	67.75		8	38.1346	-9.13456	-0.557321
	69	83	75	50	69.25	NAMUTUMBA-Busoga	38		NAKAPIRIPIRIT-Karamoja	34	68		9	38.5097	-6.50972	-0.397173
	75	72	92	84	80.75	ABIM-Karamoja	71		GULU-Acholi	45	68		10	38.5097	3.49028	0.21295
	44	41	75	55	53.75	AMUDAT-Karamoja	54		KIKUUBE-Bunyoro	29	68.5		11	41.511	-9.511	-0.580288
	63	77	63	75	69.5	MOROTO-Karamoja	68		RUKIGA-Kigezi	41	68.75		12	43.0116	-12.0116	-0.732858
	81	81	81	47	72.5	NABILATUK-Karamoja	39		SEMBABULE-S South Buganda	57	68.75		13	44.1371	-8.13712	-0.496465
	81	72	81	38	68	NAKAPIRIPIRIT-Karamoja	34		JINJA CITY-Busoga	35	69		14	44.8874	-1.88744	-0.115157
						NAPAK-Karamoja	83		NAMUTUMBA-Busoga	38	69.25		15	45.6378	17.3622	1.05931
	81	92	96	80	87.25	KABALE-Kigezi	88		ALEBTONG-Lango	45	69.25		16	46.0129	-16.0129	-0.976986
	81	67	56	76	70	KANUNGU-Kigezi	87		MOROTO-Karamoja	68	69.5		17	47.1384	-9.13841	-0.557555
	88	70	90	70	79.5	KISORO-Kigezi	63		KANUNGU-Kigezi	87	70		18	48.2639	-19.2639	-1.17533
	75	66	79	36	64	RUBANDA-Kigezi	42		KWANIA-Lango	38	70.5		19	48.2639	-6.26389	-0.382174
	69	70	94	42	68.75	RUKIGA-Kigezi	41		KYOTERA- South Buganda	81	70.5		20	48.2639	0.736114	0.044912
	81	70	65	72	72	RUKUNGIRI-Kigezi	78		RUKUNGIRI-Kigezi	78	72		21	49.0142	29.9858	1.8295
	88	67	77	45	69.25	ALEBTONG-Lango	45		NABILATUK-Karamoja	39	72.5		22	49.3894	-23.3894	-1.42704
	94	83	75	87	84.75	AMOLATAR-Lango			AMURIA-Teso	77	73		23	49.3894	-9.38937	-0.572867
	100	91	94	50	83.75	KOLE-Lango	43		OTUKE-Lango	40	73.75		24	51.2652	31.7348	1.93622
	88	77	73	44	70.5	KWANIA-Lango	38		AMURU-Acholi	46	74.75		25	51.6403	10.3597	0.632068
	100	69	58	38	66.25	LIRA-Lango	83		OBONGI-West Nile	35	75.75		26	51.6403	31.3597	1.91333
	75	80	90	50	73.75	OTUKE-Lango	40		MOYO-West Nile	61	76.5		27	52.0155	15.9845	0.975252
	100	83	85	90	89.5	OYAM-Lango	95		NGORA-Teso	74	76.75		28	52.3906	4.60935	0.281227
					#DIV/0!	BUIKWE-North Buganda	88		LAMWO-Acholi	44	77		29	52.7658	1.23419	0.0753008
					#DIV/0!	KIBOGA-North Buganda	87		KAGADI-Bunyoro	76	77		30	53.141	24.859	1.51671
	69	67	60	42	59.5	BUKOMANSIMBI-South Buganda	32		KATAKWI-Teso	79	77.5		31	53.8913	-20.8913	-1.27463
	63	70	67	68	67	BUTAMBALA-South Buganda	54		YUMBE-West Nile	72	77.75		32	53.8913	2.10871	0.128657
	56	55	67	42	55	GOMBA-South Buganda	26		BULIISA-Bunyoro	71	78		33	54.2665	-20.2665	-1.2365
	75	73	69	42	64.75	KALANGALA- South Buganda	26		BUGIRI-Busoga	74	78.25		34	54.2665	-9.26645	-0.565368
	56	66	63	71	64	KALUNGU- South Buganda	49		KISORO-Kigezi	63	79.5		35	55.0168	-26.0168	-1.58734
	56	73	79	74	70.5	KYOTERA- South Buganda	81		IGANGA-Busoga	80	79.5		36	55.3919	-14.3919	-0.878085
	50	64	56	42	53	LWENGO- South Buganda	27		ABIM-Karamoja	71	80.75		37	55.3919	1.60807	0.098112
	75	89	96	74	83.5	LYANTONDE- South Buganda	64		MASINDI-Bunyoro	77	81.25		38	55.7671	-20.7671	-1.26705
	63	66	58	42	57.25	MASAKA D- South Buganda	29		SOROTI CITY-Teso	83	81.25		39	56.1423	-18.1423	-1.1069
	81	78	92	77	82	MASAKA C- South Buganda			FORT PORTAL C- Tooro	92	82.25		40	56.1423	-11.1423	-0.679815
	69	66	71	65	67.75	MPIGI- South Buganda	56		BUTEBO-Bukedi	88	83.25		41	56.5174	11.4826	0.700579
	56	67	54	72	62.25	RAKAI- South Buganda	63		LYANTONDE- South Buganda	64	83.5		42	57.2677	29.7323	1.81403
	69	69	67	70	68.75	SEMBABULE-S South Buganda	57		KOLE-Lango	43	83.75		43	58.0181	-20.0181	-1.22135
	81	63	79	69	73	AMURIA-Teso	77		KABERAMAIDO-Teso	83	84.25		44	58.0181	22.9819	1.40218
	38	61	85	46	57.5	BUKEDEA-Teso	42		MANAFWA- Bugisu Elgon	98	84.75		45	60.269	17.731	1.08181
	88	88	88	73	84.25	KABERAMAIDO-Teso	83		NEBBI-West Nile	80	85		46	61.0193	-22.0193	-1.34345
	63	70	67	64	66	KALAKI-Teso	83		AGAGO-Acholi	90	85		47	61.7697	15.2303	0.929239
	88	56	73	33	62.5	KAPELEBYONG-Teso	30		KUMI-Teso	71	85.5		48	62.8951	-22.8951	-1.39689
	63	81	90	76	77.5	KATAKWI-Teso	79		GULU C-Acholi	86	85.5		49	64.3958	-18.3958	-1.12237
	100	73	88	81	85.5	KUMI-Teso	71		BUDUDA-Bugisu Elgon	94	86		50	65.8964	-30.8964	-1.88506
	94	63	71	79	76.75	NGORA-Teso	74		MBALE D - Bugisu Elgon	88	87		51	67.0219	-6.0219	-0.36741
	81	58	77	40	64	SERERE-Teso	29		HOIMA C-Bunyoro	88	87.25		52	67.3971	6.60294	0.402861
	88	80	79	78	81.25	SOROTI CITY-Teso	83		KABALE-Kigezi	88	87.25		53	67.7722	-23.7722	-1.4504
					#DIV/0!	BUNYANGABU-Tooro	38		ADJUMANI-West Nile	81	87.5		54	67.7722	8.22778	0.501996
	100	77	77	75	82.25	FORT PORTAL C- Tooro	92		OYAM-Lango	95	89.5		55	68.5225	10.4775	0.639254
	56	38	69	61	56	KABAROLE- Tooro	94		BUTALEJA-Bukedi	88	92.75		56	68.8977	3.1023	0.189278
	75	39	60	44	54.5	KASESE-Tooro	29						57	69.2729	1.72714	0.105377
					#DIV/0!	KYENJOJO-Tooro	29						58	69.648	4.35198	0.265524
	81	66	69	43	64.75	NTOROKO-Tooro	40						59	71.5238	-8.52382	-0.520058
	100	89	88	73	87.5	ADJUMANI-West Nile	81						60	71.5238	8.47618	0.517151
	75	56	73	61	66.25	ARUA CITY-West Nile	62						61	73.3996	-2.39962	-0.146407
	81	72	75	78	76.5	MOYO-West Nile	61						62	74.1499	2.85006	0.173888
	88	81	92	79	85	NEBBI-West Nile	80						63	74.1499	8.85006	0.539962
	88	83	90	42	75.75	OBONGI-West Nile	35						64	75.6506	16.3494	0.997516
	100	63	63	45	67.75	PAKWACH-West Nil	33						65	77.1512	10.8488	0.661909
	63	66	85	53	66.75	TEREGO-West Nile	57						66	77.5264	-13.5264	-0.825276
	69	84	81	77	77.75	YUMBE-West Nile	72						67	77.9015	-34.9015	-2.12942
	78	72	77	63	72.5	Grand Total	60						68	78.6519	4.34813	0.26529
													69	79.4022	18.5978	1.1347
													70	79.7773	0.222652	0.0135845
													71	79.7773	10.2227	0.623708
													72	80.5277	-9.52767	-0.581305
													73	80.5277	5.47233	0.33388
													74	81.278	12.722	0.776199
													75	82.7786	5.22137	0.318568
													76	83.1538	4.84621	0.295678
													77	83.1538	4.84621	0.295678
													78	83.529	-2.52895	-0.154297
													79	86.5302	8.46977	0.51676
													80	91.4073	-3.40732	-0.207888

## Sheet: 14.4Func-TargetResCoorUHC
Coordination Capacity	Quality Overall	Demand Overall	Access Overall	Functionality Overall	SNUs (Districts)- Region	Coverage of Essential Services		SNUs (Districts)- Region	UHC-SCI	Funct ADQTarResCoor
75	94	77	81	81.75	AGAGO-Acholi	90		KASESE-Tooro	29	49.75		SUMMARY OUTPUT
88	83	79	49	74.75	AMURU-Acholi	46		AMUDAT-Karamoja	54	50.5
63	77	67	47	63.5	GULU-Acholi	45		LUUKA-Busoga	32	51.25		Regression Statistics
94	91	79	84	87	GULU C-Acholi	86		BUYENDE-Busoga	38	52.5		Multiple R	0.683103
100	97	100	79	94	KITGUM - Acholi			KAPELEBYONG-Teso	30	53		R Square	0.46663
56	89	88	50	70.75	LAMWO-Acholi	44		HOIMA D-Bunyoro	36	55		Adjusted R Square	0.459792
100	70	85	88	85.75	NWOYA- Acholi			BUGWERI-Busoga	34	55.75		Standard Error	16.4644
81	67	98	44	72.5	OMORO- Acholi			LWENGO- South Buganda	27	56.25		Observations	80
88	86	88	76	84.5	BUDUDA-Bugisu Elgon	94		GOMBA-South Buganda	26	56.75
88	84	81	80	83.25	MANAFWA- Bugisu Elgon	98		KIBAALE-Bunyoro	38	57		ANOVA
63	88	90	82	80.75	MBALE D - Bugisu Elgon	88		LIRA-Lango	83	57			df	SS	MS	F	Significance F
88	64	67	81	75	MBALE C- Bugisu Elgon			MASAKA D- South Buganda	29	57.25		Regression	1	18498.2	18498.2	68.2399	2.93853e-12
94	97	94	86	92.75	BUTALEJA-Bukedi	88		BUKOMANSIMBI-South Buganda	32	58		Residual	78	21144	271.076
63	81	94	83	80.25	BUTEBO-Bukedi	88		MAYUGE-Busoga	79	58.25		Total	79	39642.2
75	78	75	78	76.5	BULIISA-Bunyoro	71		PAKWACH-West Nil	33	58.5
50	56	67	47	55	HOIMA D-Bunyoro	36		KALIRO-Busoga	43	58.5			Coefficients	Standard Error	t Stat	P-value	Lower 95%	Upper 95%	Lower 95.0%	Upper 95.0%
88	78	79	92	84.25	HOIMA C-Bunyoro	88		SERERE-Teso	29	59.5		Intercept	-43.289	12.5965	-3.4366	0.00094732	-68.3666	-18.2114	-68.3666	-18.2114
81	72	79	76	77	KAGADI-Bunyoro	76		NTOROKO-Tooro	40	60.25		Funct ADQTarResCoor	1.48381	0.179621	8.26075	2.93853e-12	1.12621	1.8414	1.12621	1.8414
56	58	75	39	57	KIBAALE-Bunyoro	38		RUBANDA-Kigezi	42	61
69	63	85	45	65.5	KIKUUBE-Bunyoro	29		KALANGALA- South Buganda	26	61.75
63	73	79	79	73.5	MASINDI-Bunyoro	77		NAMAYINGO-Busoga	31	62
44	77	81	74	69	BUGIRI-Busoga	74		KABAROLE- Tooro	94	62.25		RESIDUAL OUTPUT
56	50	77	40	55.75	BUGWERI-Busoga	34		JINJA CITY-Busoga	35	62.75
38	70	67	35	52.5	BUYENDE-Busoga	38		KALAKI-Teso	83	62.75		Observation	Predicted UHC-SCI	Residuals	Standard Residuals
63	81	79	83	76.5	IGANGA-Busoga	80		GULU-Acholi	45	63.5		1	30.5303	-1.53031	-0.0935407
44	80	58	69	62.75	JINJA CITY-Busoga	35		BUKEDEA-Teso	42	63.75		2	31.6432	22.3568	1.36657
56	72	69	72	67.25	JINJA D-Busoga	78		RAKAI- South Buganda	63	64		3	32.756	-0.756022	-0.046212
56	53	69	56	58.5	KALIRO-Busoga	43		ARUA CITY-West Nile	62	64.75		4	34.6108	3.38922	0.207167
88	59	67	71	71.25	KAMULI-Busoga	68		TEREGO-West Nile	57	65		5	35.3527	-5.35268	-0.327184
50	55	71	29	51.25	LUUKA-Busoga	32		KIKUUBE-Bunyoro	29	65.5		6	38.3203	-2.32029	-0.141828
38	64	67	64	58.25	MAYUGE-Busoga	79		KALUNGU- South Buganda	49	65.75		7	39.4331	-5.43315	-0.332102
69	64	73	42	62	NAMAYINGO-Busoga	31		RUKUNGIRI-Kigezi	78	65.75		8	40.1751	-13.1751	-0.805328
56	83	75	50	66	NAMUTUMBA-Busoga	38		NAMUTUMBA-Busoga	38	66		9	40.917	-14.917	-0.911802
50	72	92	84	74.5	ABIM-Karamoja	71		ALEBTONG-Lango	45	66		10	41.2879	-3.2879	-0.200974
31	41	75	55	50.5	AMUDAT-Karamoja	54		BUTAMBALA-South Buganda	54	67		11	41.2879	41.7121	2.54966
63	77	63	75	69.5	MOROTO-Karamoja	68		SEMBABULE-S South Buganda	57	67.25		12	41.6589	-12.6589	-0.773775
69	81	81	47	69.5	NABILATUK-Karamoja	39		JINJA D-Busoga	78	67.25		13	42.7717	-10.7717	-0.658423
81	72	81	38	68	NAKAPIRIPIRIT-Karamoja	34		MPIGI- South Buganda	56	67.75		14	43.1427	35.8573	2.19179
					NAPAK-Karamoja	83		NAKAPIRIPIRIT-Karamoja	34	68		15	43.5136	-10.5136	-0.642647
81	92	96	80	87.25	KABALE-Kigezi	88		KANUNGU-Kigezi	87	68.5		16	43.5136	-0.513613	-0.0313947
75	67	56	76	68.5	KANUNGU-Kigezi	87		KWANIA-Lango	38	68.75		17	44.9974	-15.9974	-0.977845
75	70	90	70	76.25	KISORO-Kigezi	63		BUGIRI-Busoga	74	69		18	46.1103	-6.11027	-0.373492
63	66	79	36	61	RUBANDA-Kigezi	42		NABILATUK-Karamoja	39	69.5		19	47.2231	-5.22313	-0.319265
75	70	94	42	70.25	RUKIGA-Kigezi	41		MOROTO-Karamoja	68	69.5		20	48.336	-22.336	-1.36529
56	70	65	72	65.75	RUKUNGIRI-Kigezi	78		AMURIA-Teso	77	70		21	48.7069	-17.7069	-1.08234
75	67	77	45	66	ALEBTONG-Lango	45		RUKIGA-Kigezi	41	70.25		22	49.0779	44.9221	2.74587
100	83	75	87	86.25	AMOLATAR-Lango			NGORA-Teso	74	70.5		23	49.8198	-14.8198	-0.905863
100	91	94	50	83.75	KOLE-Lango	43		LAMWO-Acholi	44	70.75		24	49.8198	33.1802	2.02815
81	77	73	44	68.75	KWANIA-Lango	38		KAMULI-Busoga	68	71.25		25	50.9326	-5.93264	-0.362634
63	69	58	38	57	LIRA-Lango	83		KYOTERA- South Buganda	81	72.25		26	51.3036	-9.30359	-0.568684
81	80	90	50	75.25	OTUKE-Lango	40		MASINDI-Bunyoro	77	73.5		27	51.6745	11.3255	0.692271
81	83	85	90	84.75	OYAM-Lango	95		OBONGI-West Nile	35	74		28	52.7874	9.2126	0.563122
				#DIV/0!	BUIKWE-North Buganda	88		ABIM-Karamoja	71	74.5		29	53.1584	3.84165	0.234822
				#DIV/0!	KIBOGA-North Buganda	87		AMURU-Acholi	46	74.75		30	53.9003	-24.9003	-1.52203
63	67	60	42	58	BUKOMANSIMBI-South Buganda	32		MOYO-West Nile	61	75		31	54.2712	-5.2712	-0.322203
63	70	67	68	67	BUTAMBALA-South Buganda	54		OTUKE-Lango	40	75.25		32	54.2712	23.7288	1.45043
63	55	67	42	56.75	GOMBA-South Buganda	26		KATAKWI-Teso	79	75.75		33	54.6422	-16.6422	-1.01726
63	73	69	42	61.75	KALANGALA- South Buganda	26		KISORO-Kigezi	63	76.25		34	54.6422	-9.64216	-0.589379
63	66	63	71	65.75	KALUNGU- South Buganda	49		BULIISA-Bunyoro	71	76.5		35	56.126	-2.12596	-0.12995
63	73	79	74	72.25	KYOTERA- South Buganda	81		IGANGA-Busoga	80	76.5		36	56.4969	0.503087	0.0307513
63	64	56	42	56.25	LWENGO- South Buganda	27		KAGADI-Bunyoro	76	77		37	56.4969	21.5031	1.31438
69	89	96	74	82	LYANTONDE- South Buganda	64		SOROTI CITY-Teso	83	78		38	57.2388	-1.23882	-0.0757229
63	66	58	42	57.25	MASAKA D- South Buganda	29		KUMI-Teso	71	79.25		39	57.6098	-23.6098	-1.44315
69	78	92	77	79	MASAKA C- South Buganda			BUTEBO-Bukedi	88	80.25		40	58.3517	28.6483	1.75114
69	66	71	65	67.75	MPIGI- South Buganda	56		MBALE D - Bugisu Elgon	88	80.75		41	58.7226	-20.7226	-1.26667
63	67	54	72	64	RAKAI- South Buganda	63		AGAGO-Acholi	90	81.75		42	59.0936	14.9064	0.911158
63	69	67	70	67.25	SEMBABULE-S South Buganda	57		LYANTONDE- South Buganda	64	82		43	59.8355	-20.8355	-1.27357
69	63	79	69	70	AMURIA-Teso	77		FORT PORTAL C- Tooro	92	82.25		44	59.8355	8.16452	0.499058
63	61	85	46	63.75	BUKEDEA-Teso	42		ADJUMANI-West Nile	81	82.75		45	60.5774	16.4226	1.00384
88	88	88	73	84.25	KABERAMAIDO-Teso	83		NEBBI-West Nile	80	83.25		46	60.9483	-19.9483	-1.21935
50	70	67	64	62.75	KALAKI-Teso	83		MANAFWA- Bugisu Elgon	98	83.25		47	61.3193	12.6807	0.775112
50	56	73	33	53	KAPELEBYONG-Teso	30		KOLE-Lango	43	83.75		48	61.6902	-17.6902	-1.08132
56	81	90	76	75.75	KATAKWI-Teso	79		YUMBE-West Nile	72	84		49	62.4321	5.56786	0.340337
75	73	88	81	79.25	KUMI-Teso	71		KABERAMAIDO-Teso	83	84.25		50	63.9159	17.0841	1.04427
69	63	71	79	70.5	NGORA-Teso	74		HOIMA C-Bunyoro	88	84.25		51	65.7707	11.2293	0.686393
63	58	77	40	59.5	SERERE-Teso	29		BUDUDA-Bugisu Elgon	94	84.5		52	66.5126	-31.5126	-1.92621
75	80	79	78	78	SOROTI CITY-Teso	83		OYAM-Lango	95	84.75		53	67.2545	3.7455	0.228944
				#DIV/0!	BUNYANGABU-Tooro	38		GULU C-Acholi	86	87		54	67.6255	-21.6255	-1.32186
100	77	77	75	82.25	FORT PORTAL C- Tooro	92		KABALE-Kigezi	88	87.25		55	67.9964	-6.99641	-0.427657
81	38	69	61	62.25	KABAROLE- Tooro	94		BUTALEJA-Bukedi	88	92.75		56	68.3674	-28.3674	-1.73396
56	39	60	44	49.75	KASESE-Tooro	29						57	69.1093	9.89074	0.604573
				#DIV/0!	KYENJOJO-Tooro	29						58	69.8512	-6.85116	-0.418779
63	66	69	43	60.25	NTOROKO-Tooro	40						59	70.2221	0.777884	0.0475483
81	89	88	73	82.75	ADJUMANI-West Nile	81						60	70.2221	9.77788	0.597675
69	56	73	61	64.75	ARUA CITY-West Nile	62						61	70.964	5.03598	0.307825
75	72	75	78	75	MOYO-West Nile	61						62	72.4478	10.5522	0.645004
81	81	92	79	83.25	NEBBI-West Nile	80						63	74.3026	-3.30258	-0.201871
81	83	90	42	74	OBONGI-West Nile	35						64	75.7864	12.2136	0.74656
63	63	63	45	58.5	PAKWACH-West Nil	33						65	76.5283	11.4717	0.701211
56	66	85	53	65	TEREGO-West Nile	57						66	78.0121	11.9879	0.732763
94	84	81	77	84	YUMBE-West Nile	72						67	78.383	-14.383	-0.879167
69	72	77	63	70.25	Grand Total	60						68	78.754	13.246	0.809665
												69	79.4959	1.5041	0.0919383
												70	80.2378	-0.237804	-0.0145358
												71	80.2378	17.7622	1.08572
												72	80.9797	-37.9797	-2.32152
												73	81.3507	-9.35066	-0.571561
												74	81.7216	1.27839	0.0781419
												75	81.7216	6.27839	0.383768
												76	82.0926	11.9074	0.727845
												77	82.4635	12.5365	0.766295
												78	85.8021	0.197925	0.0120982
												79	86.173	1.82697	0.111674
												80	94.334	-6.33396	-0.387164
